# Supplementary material for: Visualization of endogenous G proteins on endosomes and other organelles
Source: eLife journal article supplement (doi:10.7554/elife.97033), 2024-05-02

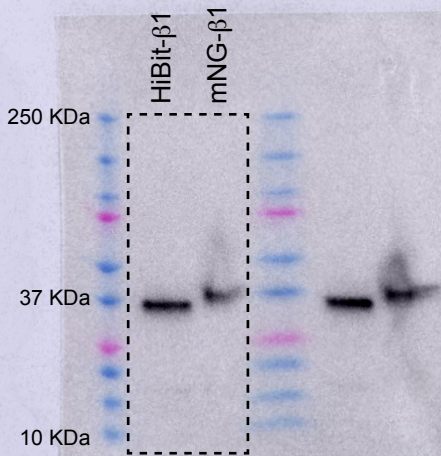

Supplement: fig1-data1 [file elife-97033-fig1-data1-v1.pdf]
