# Supplementary material for: Visualization of endogenous G proteins on endosomes and other organelles
Source: eLife. 2024 Nov 8;13:RP97033. doi: 10.7554/eLife.97033 (PMC11548881; doi:10.7554/eLife.97033)
Supplement: Figure 1—figure supplement 1—source data 1. [file elife-97033-fig1-figsupp1-data1.xlsx]

## Sheet: panels A and B
Time (seconds)	HiBit-beta1																				parental HEK																			mNG-beta1
0	1.34771	1.36054	1.34953	1.35501	1.32275	1.33511	1.32802	1.32275	1.29702	1.30039	1.29032	1.28205	1.31234	1.31752	1.3245	1.30548	1.29702	1.29534	1.27714	1.2837	1.49477	1.51057	1.53374	1.45138	1.44718	1.4556	1.44718	1.35501	1.3624	1.3587	1.38313	1.29534	1.2987	1.32275	1.31926	1.28535	1.31062	1.3089	1.31926	1.44092	1.43885	1.46199	1.43472	1.40647	1.40647	1.40845	1.41844	1.39276	1.40056
1.18	1.38696	1.35685	1.35318	1.35501	1.34953	1.31579	1.32626	1.32979	1.31062	1.30719	1.30039	1.31234	1.31926	1.31062	1.30719	1.31752	1.29702	1.29702	1.30548	1.29032	1.54321	1.53374	1.51286	1.45985	1.45773	1.45349	1.44509	1.38313	1.36799	1.36799	1.38313	1.32979	1.31234	1.32275	1.321	1.31752	1.3245	1.30548	1.31579	1.44928	1.43885	1.44092	1.42857	1.41643	1.42653	1.42857	1.43061	1.38889	1.39276
3.55	1.37552	1.35685	1.34771	1.37931	1.3587	1.31406	1.32275	1.31234	1.31234	1.29366	1.30208	1.29366	1.32979	1.31062	1.30719	1.31926	1.31579	1.30208	1.2987	1.2987	1.53139	1.51745	1.50602	1.45138	1.45138	1.4556	1.44092	1.36799	1.36054	1.37363	1.37552	1.32979	1.30719	1.31926	1.31579	1.30208	1.30208	1.31752	1.30208	1.45349	1.443	1.4556	1.44718	1.41243	1.41044	1.42653	1.41044	1.3947	1.3947
5.91	1.37552	1.3624	1.35135	1.35685	1.34409	1.33511	1.32979	1.33869	1.30548	1.29199	1.30208	1.31406	1.31926	1.30378	1.31752	1.31579	1.30039	1.2837	1.29032	1.30039	1.54083	1.52439	1.52439	1.45985	1.45349	1.44718	1.443	1.38313	1.37363	1.34953	1.36799	1.32626	1.31062	1.31406	1.3089	1.31579	1.29702	1.30208	1.31406	1.43061	1.43678	1.43472	1.43678	1.42857	1.41044	1.4245	1.42857	1.37552	1.40647
8.29	1.3624	1.36054	1.36426	1.35685	1.35685	1.321	1.32626	1.33511	1.321	1.28041	1.31062	1.30719	1.32979	1.31752	1.29534	1.31752	1.30039	1.29534	1.30208	1.29032	1.54083	1.51976	1.52672	1.47493	1.45985	1.46199	1.44928	1.38122	1.37363	1.37552	1.38889	1.31752	1.31234	1.32275	1.31926	1.3089	1.28866	1.30719	1.3089	1.43267	1.42857	1.44092	1.41844	1.42046	1.41844	1.4245	1.42046	1.40056	1.40056
10.65	1.35501	1.33511	1.36426	1.35685	1.34409	1.34048	1.35501	1.32802	1.30548	1.31234	1.29702	1.30378	1.31752	1.31579	1.321	1.31234	1.30039	1.29534	1.30039	1.28866	1.52439	1.52672	1.51976	1.45985	1.45773	1.44509	1.45138	1.39082	1.36612	1.36054	1.37931	1.321	1.31406	1.321	1.3245	1.30719	1.30378	1.29032	1.30719	1.45985	1.45138	1.44718	1.45349	1.42046	1.42247	1.3947	1.40845	1.37931	1.41044
13.02	1.3624	1.37363	1.36612	1.36799	1.3587	1.32626	1.32979	1.32626	1.31062	1.2987	1.287	1.30378	1.321	1.31579	1.32979	1.31234	1.30039	1.27551	1.29366	1.29199	1.54083	1.51976	1.49925	1.44509	1.45985	1.44928	1.44718	1.37931	1.37552	1.3624	1.38889	1.321	1.31406	1.31406	1.31234	1.3089	1.2987	1.3089	1.2987	1.45349	1.443	1.45138	1.44718	1.43267	1.39665	1.41844	1.41443	1.3986	1.39276
15.38	1.36612	1.36426	1.37174	1.36426	1.33511	1.32626	1.3369	1.32979	1.321	1.287	1.29702	1.30039	1.32275	1.31062	1.31406	1.32979	1.31926	1.30548	1.29702	1.2987	1.54321	1.51976	1.52439	1.48588	1.43885	1.44928	1.43267	1.38504	1.35685	1.37931	1.38504	1.31926	1.31062	1.32275	1.321	1.31062	1.2987	1.30719	1.30208	1.44718	1.44718	1.43267	1.43061	1.42653	1.43472	1.40253	1.42653	1.40253	1.40056
17.75	1.36054	1.35135	1.3624	1.3624	1.34409	1.33333	1.3459	1.33156	1.30719	1.28866	1.2837	1.31234	1.31926	1.3089	1.31579	1.31926	1.31062	1.29366	1.31234	1.29534	1.5361	1.50376	1.53374	1.45773	1.44928	1.45138	1.45138	1.38313	1.3624	1.35685	1.37931	1.31752	1.30719	1.30719	1.32275	1.31406	1.2987	1.30378	1.3089	1.45138	1.44092	1.46413	1.443	1.42653	1.41844	1.41443	1.43472	1.40056	1.37931
20.11	1.3624	1.37552	1.3624	1.36986	1.3369	1.32802	1.3369	1.321	1.3089	1.29032	1.30719	1.3089	1.32275	1.31234	1.30378	1.3089	1.30548	1.27388	1.287	1.28866	1.53374	1.53374	1.52905	1.46413	1.4556	1.45138	1.45773	1.37552	1.37741	1.37741	1.36986	1.31926	1.31062	1.33156	1.32626	1.2987	1.2987	1.31062	1.31062	1.46628	1.43472	1.45773	1.4245	1.4245	1.42653	1.3986	1.43267	1.37552	1.3986
22.48	1.37363	1.3624	1.35685	1.36799	1.3369	1.32626	1.32275	1.32979	1.28535	1.29032	1.287	1.29199	1.31406	1.31579	1.30378	1.30548	1.29534	1.30548	1.30208	1.28535	1.53374	1.52672	1.52439	1.46628	1.46199	1.44509	1.44509	1.37552	1.37174	1.37174	1.38504	1.31579	1.30548	1.3369	1.31579	1.30208	1.2987	1.29702	1.30208	1.44092	1.42857	1.44718	1.43061	1.41443	1.43061	1.42247	1.41844	1.38696	1.39082
24.85	1.35501	1.35685	1.36799	1.37174	1.34953	1.34228	1.34228	1.3369	1.31926	1.3089	1.2987	1.30548	1.3089	1.30208	1.31579	1.32979	1.3089	1.31234	1.2987	1.29366	1.51515	1.52207	1.51745	1.46843	1.44092	1.45773	1.46628	1.39082	1.36799	1.35685	1.36799	1.32275	1.31406	1.32802	1.32626	1.31752	1.2987	1.30378	1.31579	1.45773	1.44928	1.443	1.43678	1.40647	1.40647	1.41844	1.41844	1.37363	1.40253
27.21	1.37741	1.3624	1.36986	1.3587	1.33869	1.34953	1.32802	1.34048	1.31234	1.28205	1.27877	1.29702	1.31926	1.30378	1.31926	1.31406	1.30719	1.2987	1.28535	1.29534	1.53374	1.51057	1.52905	1.46413	1.45773	1.45773	1.45349	1.38313	1.36799	1.37174	1.38696	1.321	1.31062	1.31234	1.32275	1.31579	1.29702	1.31062	1.30719	1.44509	1.43267	1.443	1.42857	1.42046	1.40449	1.41243	1.41044	1.40253	1.40253
29.75	1.33869	1.31406	1.27877	1.2285	1.40449	1.37552	1.27877	1.24224	1.2987	1.287	1.22249	1.19474	1.38504	1.30548	1.24533	1.221	1.30548	1.28041	1.25	1.17509	1.5625	1.48588	1.47275	1.49031	1.44928	1.44928	1.3947	1.38504	1.34228	1.32802	1.3369	1.31579	1.31234	1.26422	1.22549	1.30548	1.3369	1.29032	1.24533	1.47275	1.44928	1.52207	1.38889	1.42046	1.43885	1.40449	1.41643	1.37174	1.32626
32.12	1.39082	1.39276	1.38889	1.36799	1.37741	1.36799	1.35318	1.3459	1.31406	1.31406	1.31406	1.31062	1.35685	1.34771	1.3369	1.3369	1.36612	1.33869	1.31234	1.30378	1.56986	1.54799	1.5456	1.49031	1.48148	1.48148	1.48148	1.40449	1.40253	1.38313	1.39665	1.3624	1.34228	1.35501	1.32979	1.3624	1.32979	1.32979	1.32802	1.46843	1.44509	1.443	1.46628	1.4556	1.43678	1.40845	1.42653	1.41643	1.40647
34.49	1.42653	1.4245	1.41643	1.40845	1.40647	1.38504	1.38696	1.38122	1.36799	1.33156	1.35501	1.34953	1.42857	1.39276	1.39665	1.37741	1.45985	1.40056	1.37363	1.36799	1.5873	1.55279	1.55039	1.50376	1.51057	1.50602	1.49701	1.41643	1.40845	1.41243	1.41243	1.41643	1.40449	1.38889	1.3947	1.43678	1.39276	1.37552	1.40845	1.50602	1.45349	1.49031	1.51515	1.4771	1.44928	1.46628	1.45349	1.44092	1.44718
36.85	1.46628	1.45985	1.46199	1.41443	1.45349	1.4245	1.42247	1.40449	1.39276	1.37174	1.38504	1.37741	1.51286	1.46413	1.45349	1.41044	1.55279	1.46843	1.41844	1.42653	1.60514	1.5625	1.57978	1.51976	1.52439	1.51057	1.50602	1.45773	1.43267	1.42653	1.43885	1.49477	1.4556	1.44718	1.44718	1.52207	1.44092	1.42857	1.45349	1.52905	1.49477	1.48588	1.49031	1.51745	1.46199	1.48148	1.46628	1.47275	1.47059
39.23	1.50376	1.4771	1.4771	1.44509	1.47929	1.45985	1.43885	1.42857	1.42653	1.38696	1.38504	1.40253	1.58983	1.51057	1.49701	1.47275	1.64204	1.54083	1.45985	1.46199	1.60514	1.59744	1.5873	1.5873	1.5456	1.53374	1.5361	1.47493	1.45138	1.43472	1.45985	1.5625	1.52207	1.49925	1.49254	1.63132	1.51745	1.49254	1.50602	1.55521	1.51057	1.49254	1.51745	1.52905	1.51515	1.49254	1.48809	1.50376	1.48809
41.59	1.5456	1.51745	1.47493	1.46199	1.52439	1.49254	1.44718	1.44509	1.45985	1.38696	1.40056	1.40647	1.65563	1.5674	1.53374	1.5015	1.73611	1.5949	1.50602	1.51286	1.62338	1.60514	1.6	1.57978	1.57233	1.54321	1.54083	1.51515	1.4771	1.46199	1.47059	1.65289	1.55039	1.52672	1.5361	1.7094	1.54799	1.55039	1.5625	1.55279	1.52905	1.52905	1.54799	1.54083	1.52672	1.51745	1.49031	1.53846	1.51745
43.97	1.58228	1.54083	1.51057	1.5015	1.56006	1.49925	1.48148	1.48148	1.4771	1.41643	1.41443	1.42857	1.72712	1.60772	1.57233	1.54083	1.80832	1.66113	1.5674	1.5674	1.63399	1.62602	1.63132	1.60256	1.58228	1.55039	1.55763	1.55521	1.5083	1.48148	1.49254	1.71233	1.6	1.56495	1.54321	1.78891	1.62338	1.5873	1.62075	1.59744	1.5625	1.5625	1.55521	1.59236	1.53846	1.52207	1.51286	1.55039	1.54321
46.33	1.60514	1.58228	1.55521	1.51976	1.6129	1.54083	1.5015	1.48368	1.49925	1.42653	1.43061	1.44928	1.78253	1.66389	1.61551	1.56986	1.89394	1.68634	1.56986	1.5949	1.69205	1.64745	1.62075	1.62866	1.60772	1.5873	1.5748	1.59744	1.48368	1.50376	1.49254	1.77305	1.63934	1.59744	1.61031	1.86567	1.66389	1.62338	1.65289	1.62338	1.5873	1.56495	1.5674	1.59744	1.56006	1.53139	1.55763	1.57978	1.54799
48.7	1.65837	1.5949	1.58479	1.55521	1.64204	1.55279	1.5083	1.51976	1.52905	1.45349	1.4556	1.4556	1.81818	1.67504	1.62866	1.60256	1.96464	1.71527	1.60514	1.63399	1.66667	1.63132	1.67224	1.65837	1.63399	1.57729	1.5748	1.61812	1.52672	1.50376	1.52905	1.83824	1.68067	1.62602	1.62338	1.91939	1.68919	1.65289	1.67785	1.66113	1.5748	1.5625	1.5748	1.65563	1.54083	1.56006	1.56495	1.60256	1.56986
51.06	1.69491	1.62075	1.6	1.56495	1.67224	1.58228	1.54799	1.51515	1.55763	1.45773	1.46413	1.46843	1.86567	1.71527	1.66389	1.61031	2.00803	1.76991	1.63399	1.65289	1.69205	1.66113	1.66945	1.66389	1.64204	1.62075	1.58983	1.62075	1.55279	1.51515	1.53374	1.87617	1.68634	1.66113	1.64474	1.97629	1.72414	1.67504	1.71821	1.66945	1.59236	1.61551	1.58479	1.66113	1.6	1.56006	1.57233	1.63666	1.58228
53.43	1.70358	1.63132	1.58983	1.58228	1.69205	1.6	1.54799	1.52207	1.57729	1.48588	1.49477	1.48809	1.88324	1.75131	1.7094	1.65289	2.06612	1.81818	1.66945	1.69205	1.70358	1.66113	1.68067	1.69779	1.66113	1.63934	1.6129	1.65837	1.5674	1.5361	1.5456	1.93798	1.7301	1.68634	1.67785	2.04499	1.75131	1.7301	1.7452	1.70068	1.63132	1.61551	1.62338	1.70358	1.57978	1.57978	1.61031	1.65837	1.60256
55.8	1.7452	1.67224	1.60772	1.60256	1.7301	1.63666	1.5748	1.5748	1.60772	1.48148	1.52207	1.49925	1.92308	1.76991	1.71233	1.64474	2.10526	1.82149	1.6835	1.71821	1.70649	1.69491	1.66113	1.73611	1.68634	1.63399	1.6	1.68067	1.57233	1.5625	1.55279	1.98413	1.73913	1.69779	1.69205	2.079	1.79211	1.73611	1.75747	1.70649	1.63132	1.62866	1.61551	1.70649	1.60772	1.6	1.61551	1.67785	1.62602
58.17	1.77936	1.69491	1.63934	1.6	1.75439	1.63399	1.57729	1.57233	1.62602	1.51286	1.51515	1.51745	1.94932	1.79533	1.7331	1.6835	2.11864	1.85874	1.71527	1.7452	1.71527	1.68919	1.70649	1.74825	1.69205	1.64745	1.63399	1.70649	1.5873	1.55521	1.5748	1.99601	1.76678	1.72712	1.71233	2.12766	1.80505	1.76367	1.76991	1.7331	1.64204	1.65837	1.63666	1.71821	1.63666	1.5949	1.62338	1.70068	1.63934
60.54	1.78571	1.70358	1.66945	1.63132	1.76056	1.64745	1.60772	1.5949	1.64204	1.52439	1.53374	1.53374	2.00401	1.80832	1.78571	1.69491	2.1645	1.87266	1.72414	1.74216	1.72712	1.72117	1.68067	1.75747	1.70068	1.66113	1.63666	1.72712	1.5949	1.56006	1.59236	2.1692	1.8018	1.73611	1.7301	2.14133	1.82482	1.77936	1.80832	1.76056	1.66667	1.65017	1.67785	1.7452	1.65017	1.59744	1.62866	1.7452	1.67504
62.9	1.79533	1.70358	1.69205	1.61812	1.78253	1.66667	1.60772	1.60514	1.64204	1.54321	1.55279	1.54083	1.9802	1.85185	1.76991	1.71233	2.19298	1.89036	1.74825	1.7762	1.74825	1.72117	1.71821	1.73913	1.71527	1.65017	1.6129	1.7301	1.61812	1.5873	1.58983	2.07469	1.82482	1.75439	1.74825	2.23714	1.85874	1.79211	1.82482	1.78571	1.68919	1.68067	1.66389	1.76991	1.67504	1.62866	1.64474	1.74825	1.68067
65.27	1.81159	1.72117	1.70649	1.65289	1.80505	1.69491	1.62338	1.61031	1.67224	1.5625	1.55039	1.5674	2.0202	1.85874	1.78571	1.70649	2.2173	1.90114	1.75131	1.78253	1.76367	1.74825	1.71821	1.7762	1.72414	1.67504	1.66113	1.76056	1.62075	1.58479	1.59744	2.09644	1.84162	1.77305	1.75131	2.23214	1.88324	1.81159	1.84843	1.7762	1.7094	1.68919	1.69491	1.79211	1.68634	1.65563	1.67785	1.75439	1.69205
67.63	1.86916	1.75439	1.71527	1.66389	1.81818	1.69779	1.61812	1.58983	1.66945	1.55039	1.55279	1.54321	2.07469	1.84502	1.79211	1.72117	2.24719	1.93798	1.7762	1.81159	1.7762	1.71821	1.70358	1.80505	1.72712	1.69779	1.65837	1.76678	1.63399	1.62338	1.61551	2.1322	1.84502	1.78571	1.75747	2.24719	1.88324	1.82482	1.8622	1.81159	1.71233	1.68067	1.68919	1.81159	1.66389	1.66667	1.66945	1.82482	1.7094
70.01	1.85185	1.75439	1.72712	1.64474	1.83486	1.71233	1.66667	1.63399	1.71527	1.55763	1.5625	1.5674	2.04499	1.8622	1.79211	1.74216	2.25734	1.93798	1.76991	1.80832	1.78253	1.7331	1.74216	1.78571	1.77305	1.69205	1.65017	1.78253	1.64474	1.62866	1.61812	2.1322	1.88679	1.79856	1.78891	2.26757	1.91205	1.83486	1.88324	1.82482	1.74216	1.7301	1.71527	1.79856	1.71527	1.64474	1.6835	1.83486	1.7452
72.37	1.88679	1.77936	1.72712	1.67224	1.8315	1.7331	1.65289	1.62338	1.71821	1.5625	1.5674	1.5748	2.08768	1.88324	1.78891	1.75747	2.2779	1.94932	1.76991	1.82815	1.77305	1.73913	1.7452	1.80832	1.75131	1.70649	1.67504	1.80505	1.63666	1.59744	1.61812	2.1645	1.85874	1.80832	1.79211	2.25225	1.91571	1.85185	1.89036	1.84162	1.76678	1.73611	1.70068	1.83824	1.71527	1.67785	1.70358	1.8315	1.74825
74.75	1.90114	1.77305	1.73913	1.68634	1.89394	1.76056	1.64474	1.63399	1.71233	1.57233	1.58479	1.57978	2.08333	1.89036	1.83824	1.76056	2.2831	1.95312	1.79211	1.83824	1.80832	1.75747	1.75439	1.82482	1.77305	1.71233	1.68067	1.79211	1.67504	1.62338	1.63934	2.15983	1.89036	1.8018	1.82149	2.2831	1.9305	1.7762	1.89753	1.9084	1.76991	1.73611	1.74825	1.85185	1.7331	1.67504	1.69205	1.84843	1.7331
77.11	1.90114	1.8018	1.76056	1.70068	1.90476	1.74825	1.65289	1.63934	1.74216	1.59236	1.58983	1.58228	2.10084	1.89394	1.82149	1.75747	2.30415	1.97629	1.81488	1.85529	1.79533	1.75131	1.77305	1.83824	1.77936	1.70649	1.69779	1.8018	1.63666	1.64474	1.63666	2.20264	1.89753	1.82482	1.81488	2.29358	1.94932	1.89394	1.90114	1.89394	1.77305	1.75747	1.73611	1.85185	1.7094	1.68634	1.69779	1.86916	1.75131
79.49	1.94175	1.81159	1.75131	1.7094	1.90476	1.76367	1.66667	1.64745	1.73913	1.6129	1.60772	1.58228	2.1097	1.91571	1.82149	1.75131	2.29885	2.01613	1.80832	1.85185	1.80505	1.78891	1.77305	1.84502	1.78571	1.71821	1.69779	1.83824	1.6835	1.64474	1.63666	2.1978	1.91205	1.83486	1.8018	2.35294	1.94932	1.88679	1.90476	1.8622	1.79211	1.75439	1.7452	1.86567	1.74825	1.70358	1.70068	1.86567	1.7452
81.85	1.95695	1.8018	1.78253	1.72117	1.90114	1.78253	1.67785	1.64474	1.73913	1.6	1.6129	1.61551	2.11864	1.91571	1.86567	1.78891	2.331	1.98413	1.80832	1.84502	1.8018	1.76991	1.78253	1.83486	1.79856	1.73611	1.66389	1.83824	1.69491	1.65289	1.63934	2.22222	1.92678	1.83824	1.82815	2.36407	1.94552	1.90476	1.94175	1.91205	1.78571	1.76367	1.75131	1.86567	1.74216	1.70358	1.7094	1.89753	1.78253
84.22	1.9305	1.81818	1.77305	1.70649	1.91571	1.76991	1.7094	1.65017	1.76678	1.60256	1.6	1.60256	2.11416	1.93798	1.85874	1.7762	2.34192	1.98807	1.83486	1.86916	1.84502	1.75747	1.77936	1.8622	1.76991	1.72414	1.70358	1.84502	1.67224	1.64745	1.63666	2.20751	1.91205	1.84843	1.8018	2.33645	2.04082	1.90114	1.91205	1.93424	1.79211	1.76367	1.7452	1.88679	1.76367	1.73611	1.73611	1.89753	1.7762
86.58	1.97629	1.85185	1.8018	1.71527	1.93798	1.8018	1.70068	1.66113	1.75131	1.59744	1.62338	1.5949	2.14592	1.92678	1.84843	1.79533	2.32019	2.01613	1.82482	1.87266	1.83824	1.78891	1.79211	1.85185	1.79856	1.74825	1.69779	1.85874	1.67785	1.65017	1.6835	2.23214	1.93798	1.84162	1.85529	2.36407	1.9802	1.90114	1.93798	1.93424	1.81818	1.77936	1.77936	1.89753	1.76056	1.71527	1.75131	1.90476	1.79533
88.95	1.97629	1.82149	1.80505	1.72414	1.92308	1.80505	1.71527	1.6835	1.76367	1.60514	1.61551	1.6129	2.15054	1.93798	1.85185	1.78571	2.331	2.0202	1.84162	1.86916	1.86567	1.78891	1.79856	1.84843	1.79533	1.7452	1.71233	1.82815	1.70358	1.65837	1.68067	2.24719	1.9305	1.84162	1.84843	2.38664	1.9802	1.94932	1.95312	1.94552	1.82482	1.79211	1.78891	1.91571	1.76056	1.73913	1.74216	1.92308	1.78571
91.32	1.98413	1.86567	1.80832	1.73611	1.91939	1.81159	1.7094	1.68634	1.75747	1.63132	1.62866	1.60772	2.14592	1.95695	1.86567	1.78891	2.34742	2.05339	1.83824	1.88679	1.83486	1.82149	1.78891	1.89394	1.8018	1.75131	1.7094	1.88324	1.68067	1.66945	1.69205	2.22717	1.94552	1.84843	1.82815	2.34742	1.99203	1.91571	1.95312	1.94932	1.81818	1.77936	1.80832	1.90114	1.74825	1.72712	1.73913	1.92678	1.81818
93.68	1.96464	1.86567	1.80505	1.75439	1.97629	1.8018	1.7301	1.69205	1.8018	1.63666	1.61812	1.60772	2.15054	1.95312	1.85185	1.77936	2.35849	2.03666	1.84162	1.86567	1.84843	1.77936	1.7762	1.8797	1.79856	1.72414	1.69491	1.89036	1.70068	1.67224	1.68067	2.24215	1.93798	1.84843	1.83486	2.38664	1.99601	1.94175	1.94175	1.92308	1.83824	1.83824	1.80505	1.93424	1.81159	1.73913	1.76056	1.91205	1.81488
96.05	1.98413	1.87266	1.81818	1.75131	1.99203	1.82149	1.71821	1.69491	1.76056	1.63934	1.63399	1.62602	2.15517	1.94932	1.87266	1.80505	2.34742	2.04918	1.83824	1.8797	1.85529	1.8018	1.8018	1.88679	1.81488	1.74825	1.71233	1.8622	1.7094	1.6835	1.69205	2.26757	1.95695	1.88324	1.85874	2.3753	2.01613	1.92308	1.96078	1.99203	1.83486	1.81488	1.80505	1.94552	1.79211	1.73611	1.77936	1.92308	1.8315
98.41	2.00803	1.87617	1.84162	1.75131	1.96078	1.8315	1.71821	1.69779	1.78891	1.6129	1.62602	1.60256	2.1645	1.96464	1.87266	1.81818	2.36967	2.07039	1.85529	1.89394	1.8797	1.79856	1.80832	1.89394	1.81818	1.75131	1.7301	1.89036	1.71233	1.66945	1.68634	2.2779	1.95312	1.85874	1.8622	2.39808	2.0284	1.94932	1.9685	1.95695	1.85185	1.84502	1.79533	1.97239	1.78571	1.74825	1.77936	1.91571	1.83824
100.78	2.00401	1.88324	1.82815	1.76367	1.95695	1.80832	1.74216	1.7094	1.79533	1.63399	1.63666	1.65563	2.1645	1.96078	1.86916	1.79856	2.36967	2.00803	1.83486	1.88679	1.85185	1.81159	1.82149	1.89394	1.81818	1.77305	1.71821	1.8622	1.68634	1.67785	1.68919	2.22717	1.94932	1.86567	1.86567	2.38095	2.0202	1.91205	1.96464	1.95312	1.84162	1.81488	1.82815	1.94932	1.75439	1.75439	1.7762	1.95695	1.85185
103.14	2.01207	1.89394	1.84502	1.76367	1.96078	1.8315	1.71821	1.71821	1.78253	1.63666	1.64204	1.61812	2.1692	1.97629	1.90114	1.8018	2.45098	2.05339	1.84162	1.89753	1.83486	1.81488	1.79533	1.88324	1.80832	1.73611	1.72117	1.89753	1.6835	1.68919	1.69491	2.22717	1.94932	1.88679	1.8622	2.40964	2.01613	1.93798	1.9802	1.98807	1.86916	1.80832	1.82815	1.94932	1.7762	1.75439	1.79533	1.93798	1.84502
105.52	2.02429	1.89036	1.84162	1.7762	1.98413	1.8315	1.7331	1.70068	1.79856	1.62602	1.65289	1.64204	2.1692	1.9685	1.89753	1.82815	2.36407	2.03252	1.84843	1.87266	1.84502	1.8315	1.8315	1.86916	1.84162	1.75131	1.74216	1.90114	1.73611	1.67504	1.70068	2.26757	1.98413	1.8797	1.85185	2.40385	2.03666	1.96078	1.97239	1.99203	1.85529	1.83486	1.82815	1.99203	1.8018	1.76367	1.77936	1.95695	1.82815
107.88	2.01613	1.89753	1.84843	1.7452	1.9685	1.83824	1.75439	1.71527	1.79533	1.64745	1.63934	1.62602	2.14592	1.95695	1.88679	1.81488	2.38664	2.06186	1.85874	1.89753	1.88324	1.81159	1.79856	1.86916	1.82149	1.77936	1.70358	1.89394	1.71527	1.70068	1.71527	2.2831	1.98413	1.89036	1.87266	2.40964	2.0284	1.94175	1.9802	2	1.8797	1.82149	1.79533	1.97239	1.80832	1.76678	1.76367	1.98413	1.82149
110.29	2.01613	1.89753	1.8315	1.76367	1.97239	1.85185	1.73611	1.71821	1.78571	1.63666	1.63132	1.65563	2.17391	1.97629	1.89394	1.81488	2.36967	2.06612	1.87266	1.8797	1.85529	1.82482	1.82149	1.89753	1.82815	1.74825	1.72117	1.91571	1.72414	1.70068	1.69491	2.26244	1.96464	1.88324	1.87617	2.39234	2.0284	1.9685	1.97239	1.99601	1.87617	1.84843	1.8622	1.97629	1.81488	1.7762	1.78891	1.97629	1.84502
112.65	2.03252	1.88679	1.83486	1.78571	1.98413	1.84502	1.75131	1.70358	1.79211	1.62338	1.64745	1.65289	2.17865	1.9685	1.89753	1.83486	2.40385	2.06186	1.84502	1.90476	1.87266	1.81159	1.81488	1.88324	1.83486	1.76991	1.73913	1.88324	1.72712	1.68634	1.69779	2.2831	1.9685	1.88679	1.86567	2.39808	2.06186	1.95695	1.99203	1.99601	1.88324	1.82815	1.84162	1.96078	1.78891	1.78571	1.79856	1.9685	1.85874
115.02	2.0202	1.89394	1.83824	1.76991	1.98807	1.85185	1.72712	1.7331	1.80505	1.64204	1.65289	1.63934	2.1645	1.9685	1.89394	1.82815	2.38095	2.07469	1.8797	1.91205	1.87617	1.81159	1.82149	1.86916	1.81818	1.74825	1.7094	1.90476	1.7452	1.6835	1.70068	2.2779	1.94932	1.90114	1.85874	2.40385	2.04918	1.9685	1.97629	2.01613	1.89394	1.83824	1.82149	1.9802	1.83486	1.76678	1.8018	1.98807	1.86916
117.38	2.0284	1.88324	1.82482	1.78571	1.98413	1.85874	1.73611	1.72414	1.80832	1.66389	1.66113	1.62866	2.18818	1.96464	1.88679	1.81488	2.39808	2.04918	1.8622	1.91205	1.88679	1.85529	1.82482	1.9084	1.83824	1.76991	1.73611	1.90114	1.71527	1.68919	1.72117	2.25734	1.98413	1.87617	1.85874	2.42718	2.07039	1.97629	1.97629	2.00401	1.88324	1.85185	1.84843	1.97239	1.81159	1.77305	1.76056	1.9802	1.8622
119.75	2.0284	1.92308	1.86916	1.76678	2	1.80832	1.74825	1.71821	1.8018	1.65563	1.66667	1.65017	2.19298	2	1.89036	1.8315	2.39234	2.06186	1.86567	1.90476	1.88324	1.82815	1.80832	1.8797	1.84162	1.79211	1.73611	1.91205	1.71527	1.71233	1.70068	2.2831	1.98413	1.90114	1.89036	2.43309	2.04082	1.98413	1.99601	2.0202	1.9084	1.84162	1.82482	1.98807	1.81488	1.79856	1.80505	2.00401	1.85529
122.12	2.0284	1.87266	1.85185	1.77305	2	1.8622	1.75131	1.70649	1.81159	1.63399	1.65563	1.65017	2.18341	1.99203	1.89753	1.8315	2.39234	2.03666	1.8622	1.91205	1.89394	1.83486	1.85529	1.89753	1.83824	1.75439	1.75131	1.89036	1.7301	1.70358	1.70358	2.27273	1.97629	1.91205	1.86567	2.41546	2.04082	1.9802	2.00401	2.00803	1.87617	1.85874	1.8622	1.98807	1.81159	1.76991	1.80832	2.00401	1.8622
124.48	2.05339	1.89753	1.87266	1.77936	2.00401	1.85874	1.73913	1.7301	1.79211	1.65017	1.68634	1.64204	2.19298	1.97239	1.87617	1.83486	2.39808	2.09205	1.87617	1.91939	1.87617	1.8315	1.82482	1.88324	1.84502	1.76991	1.73611	1.9084	1.7301	1.72414	1.70068	2.29358	1.9685	1.90476	1.88324	2.40385	2.05761	1.98413	2	2.00401	1.89753	1.84162	1.86916	2	1.8315	1.77305	1.81488	2.01207	1.86916
126.85	2.0284	1.92678	1.87617	1.79211	1.98413	1.86567	1.75747	1.71233	1.8018	1.66113	1.68067	1.64474	2.17865	1.98807	1.87617	1.81818	2.39808	2.09644	1.87617	1.92308	1.89036	1.83486	1.8018	1.9084	1.84502	1.79211	1.7452	1.91205	1.74216	1.70068	1.71821	2.26757	1.98807	1.90476	1.88679	2.41546	2.04918	1.98807	2.00401	2.01613	1.91205	1.84162	1.85529	1.99601	1.83486	1.77305	1.79211	1.98413	1.88679
129.21	2.06612	1.90476	1.85529	1.77305	2	1.82482	1.7452	1.7094	1.78253	1.66389	1.67224	1.64474	2.17865	1.9802	1.90476	1.8315	2.42131	2.07469	1.85185	1.91939	1.86567	1.84843	1.84162	1.89036	1.8315	1.77936	1.75131	1.90476	1.71527	1.70068	1.71821	2.29358	1.98807	1.90114	1.87266	2.43902	2.05761	1.9802	2.00803	2.0284	1.90476	1.88679	1.84162	1.95695	1.82482	1.76678	1.81488	1.96464	1.87266
131.58	2.04499	1.91571	1.8622	1.80832	1.99203	1.84843	1.76367	1.72414	1.83824	1.63934	1.66667	1.65837	2.1645	1.9802	1.89036	1.84502	2.39808	2.07469	1.89753	1.89394	1.90114	1.82815	1.84162	1.92678	1.85529	1.78253	1.74216	1.89394	1.74216	1.71821	1.7301	2.27273	1.9802	1.91939	1.91205	2.43309	2.05761	1.98807	2.00401	2.03252	1.86916	1.84162	1.87617	1.99203	1.84162	1.77936	1.79856	2.00401	2.04499
133.94	2.0284	1.92308	1.88324	1.81488	1.97239	1.82482	1.72712	1.71233	1.78891	1.64745	1.66945	1.65017	2.1978	1.96464	1.89753	1.8315	2.40964	2.06612	1.88324	1.91939	1.87266	1.84843	1.83824	1.88679	1.83824	1.77936	1.74825	1.89753	1.72712	1.71527	1.7094	2.2831	1.97239	1.88324	1.90114	2.39808	2.06186	1.97629	1.98807	2.02429	1.92678	1.87617	1.84502	1.9802	1.84502	1.80832	1.82149	1.97239	1.87266
136.32	2.05339	1.93424	1.85529	1.79856	2.00803	1.84162	1.74216	1.73913	1.80832	1.67785	1.67504	1.66945	2.18341	1.9802	1.91205	1.81818	2.38095	2.06186	1.89394	1.90114	1.88679	1.87266	1.82482	1.90114	1.83486	1.77936	1.73913	1.90476	1.74825	1.70649	1.71821	2.2779	1.98807	1.90476	1.88679	2.41546	2.04918	1.97239	2.0202	2.0202	1.90476	1.88324	1.85529	2.01207	1.84502	1.80505	1.81488	1.9802	1.86567
138.68	2.01613	1.91205	1.8797	1.81159	1.99601	1.85874	1.76056	1.71821	1.82149	1.63399	1.66945	1.66945	2.17865	2.00401	1.89394	1.84162	2.38664	2.05761	1.87266	1.89394	1.89394	1.85529	1.82149	1.89036	1.82149	1.79533	1.7331	1.89753	1.7331	1.70358	1.7094	2.2831	1.99203	1.92308	1.8797	2.41546	2.06186	1.97239	2.00401	2.00803	1.89394	1.86567	1.87617	2	1.81818	1.8018	1.80505	1.97239	1.89036
141.05	2.07039	1.94932	1.85185	1.79211	1.98413	1.8622	1.74216	1.72117	1.8018	1.66667	1.65017	1.66667	2.1978	1.99203	1.90476	1.85874	2.40385	2.06186	1.88679	1.91205	1.89036	1.80832	1.83486	1.87266	1.82482	1.76678	1.7331	1.89753	1.72117	1.71527	1.72117	2.2779	2.00803	1.89394	1.89753	2.41546	2.06186	1.97239	2.01613	2.03666	1.91571	1.88324	1.8797	2.01613	1.8315	1.81159	1.82482	1.9802	1.85185
143.41	2.06186	1.9305	1.85874	1.81159	2.00803	1.85874	1.76678	1.74825	1.81818	1.64474	1.63666	1.66389	2.15983	1.99601	1.90476	1.8315	2.41546	2.06612	1.85529	1.91571	1.87617	1.84502	1.84843	1.87266	1.85185	1.78253	1.73611	1.8797	1.7331	1.70068	1.72712	2.25225	2.00803	1.91939	1.89036	2.43309	2.05339	1.99601	2.00401	2.04499	1.89753	1.88324	1.86916	1.9802	1.81488	1.79533	1.81818	1.98807	1.89394
145.78	2.04082	1.9305	1.85529	1.8018	2.01207	1.85529	1.76056	1.7452	1.82149	1.64745	1.67785	1.66389	2.1978	1.99203	1.90114	1.82482	2.36967	2.06612	1.87266	1.9084	1.84502	1.86567	1.83486	1.90476	1.8315	1.76056	1.73611	1.89394	1.72712	1.69491	1.71821	2.29358	1.99203	1.91571	1.87617	2.43309	2.05761	1.98413	2	1.99601	1.9084	1.87266	1.86916	2.04082	1.81818	1.8018	1.81159	1.95312	1.8797
148.14	2.01207	1.94932	1.91205	1.78891	2	1.87617	1.74825	1.71527	1.81818	1.66667	1.66667	1.66389	2.18818	1.99203	1.90476	1.81159	2.38664	2.04499	1.88324	1.91571	1.90114	1.87617	1.83486	1.86916	1.83824	1.78891	1.72414	1.89753	1.72712	1.7094	1.7331	2.29358	1.99203	1.89394	1.89394	2.42131	2.07469	1.98807	2.02429	2.05339	1.90476	1.87266	1.87617	2.03666	1.81818	1.7762	1.82815	1.99601	1.87266
150.51	2.07039	1.91939	1.88324	1.81818	1.98413	1.88324	1.77936	1.71527	1.81488	1.66389	1.65563	1.67504	2.1978	1.99203	1.91205	1.82815	2.3753	2.04918	1.86567	1.89394	1.86567	1.86916	1.82482	1.89394	1.85529	1.77305	1.7331	1.90114	1.73913	1.72712	1.71821	2.2831	1.98413	1.91205	1.86567	2.40385	2.07469	1.97239	1.99601	2.04499	1.93424	1.88679	1.8622	1.99601	1.84843	1.8018	1.8315	1.97239	1.87617
152.87	2.0284	1.93424	1.90114	1.78891	2	1.87617	1.75747	1.72117	1.81488	1.65289	1.67504	1.66945	2.18818	1.99203	1.90114	1.80832	2.38095	2.06612	1.87617	1.90114	1.90476	1.85874	1.84843	1.88324	1.80505	1.7762	1.74216	1.89394	1.7301	1.72117	1.74825	2.29358	1.98413	1.92308	1.90114	2.40964	2.05339	1.99601	2.0202	2.04082	1.9084	1.8797	1.88679	1.96078	1.86567	1.76991	1.8315	2	1.8797
155.23	2.0202	1.92308	1.89036	1.81488	2.00803	1.84502	1.75131	1.74216	1.79533	1.64474	1.65289	1.66113	2.1692	2	1.91571	1.84162	2.38664	2.07469	1.85185	1.89753	1.90476	1.87266	1.82482	1.88679	1.84162	1.75747	1.75439	1.89394	1.71821	1.71821	1.74216	2.27273	1.98413	1.90476	1.88679	2.45098	2.06612	1.97239	2.01207	2.03666	1.91939	1.86567	1.8797	2.0202	1.83824	1.80832	1.80505	1.99601	1.8797
157.6	2.03252	1.9305	1.86916	1.81488	1.98413	1.87617	1.76367	1.7452	1.78891	1.64745	1.66945	1.66667	2.1978	1.98413	1.88324	1.84843	2.39808	2.05339	1.8622	1.93798	1.90476	1.84843	1.82815	1.88324	1.85185	1.77936	1.7331	1.90114	1.7331	1.7301	1.70358	2.27273	1.97629	1.91571	1.89394	2.42718	2.04918	1.98807	2	2.04082	1.91205	1.8797	1.86916	2.02429	1.82482	1.79533	1.85529	2	1.89036
159.96	2.04499	1.94932	1.87617	1.82149	2.00401	1.86567	1.76367	1.74825	1.80832	1.66945	1.65289	1.66389	2.15054	2	1.89753	1.83824	2.40964	2.04918	1.87617	1.93424	1.89753	1.8622	1.82482	1.8622	1.84162	1.77305	1.74216	1.89036	1.74216	1.72414	1.71527	2.26757	1.99601	1.93424	1.90114	2.40964	2.07039	1.98413	1.99601	1.98413	1.88324	1.8797	1.8797	1.99601	1.82815	1.80505	1.81488	1.9802	1.88679
162.33	2.03252	1.94552	1.89036	1.81159	1.97629	1.84502	1.76056	1.72712	1.78571	1.69779	1.67504	1.65563	2.17391	1.9802	1.91205	1.84162	2.39808	2.079	1.87617	1.90476	1.89753	1.8622	1.82149	1.89036	1.81818	1.76991	1.76678	1.87266	1.72117	1.70068	1.73913	2.25734	1.98413	1.91205	1.90114	2.46305	2.07039	1.99601	2.04918	2.04918	1.91571	1.88679	1.87266	2.01207	1.82482	1.81488	1.85185	1.97629	1.88679
164.69	2.03252	1.93798	1.90114	1.81488	1.97629	1.8622	1.76367	1.73611	1.78253	1.65017	1.67224	1.66113	2.17865	1.97629	1.89753	1.8315	2.39234	2.05761	1.87266	1.90476	1.90114	1.84162	1.85529	1.86916	1.83486	1.79211	1.74825	1.89394	1.7331	1.69491	1.73611	2.26244	1.98413	1.90476	1.88324	2.43902	2.07039	1.9802	2.01613	2.03666	1.92308	1.90114	1.8797	1.98807	1.81488	1.80505	1.82482	1.97629	1.88679
167.07	2.04499	1.90476	1.87266	1.79211	1.99601	1.87266	1.76678	1.75439	1.77936	1.68919	1.66113	1.65837	2.18818	1.98413	1.89753	1.81159	2.36967	2.04918	1.86567	1.91939	1.89036	1.86567	1.85185	1.87266	1.82149	1.78571	1.76056	1.85529	1.7331	1.71527	1.72712	2.24215	1.98807	1.92308	1.89036	2.42718	2.07039	1.98413	2.0202	2.07039	1.9305	1.8797	1.86567	2	1.81818	1.79533	1.81818	1.97239	1.89394
169.43	2.04918	1.92678	1.89394	1.79856	1.98807	1.83824	1.75131	1.7301	1.82149	1.64745	1.67224	1.67504	2.17865	1.97239	1.90114	1.81159	2.35849	2.079	1.85185	1.92308	1.87266	1.8622	1.8315	1.86916	1.83486	1.76056	1.73611	1.9084	1.72117	1.73611	1.72117	2.25734	1.97629	1.86916	1.88324	2.43309	2.05339	2	2.0284	2.06186	1.90476	1.88324	1.89036	1.95695	1.82149	1.8018	1.82815	1.9685	1.8797
171.81	2.00401	1.94932	1.88679	1.8018	1.99601	1.85874	1.7452	1.7301	1.8018	1.66113	1.67224	1.66389	2.1645	1.98413	1.90114	1.8315	2.3753	2.04499	1.86567	1.91205	1.8797	1.85874	1.84162	1.87266	1.8315	1.79211	1.75131	1.89036	1.7301	1.72117	1.72414	2.331	2.01613	1.91205	1.88679	2.42718	2.079	1.99203	2.04082	2.03666	1.90476	1.88679	1.87617	1.96078	1.82482	1.77305	1.81488	1.98413	1.88679
174.17	2.03666	1.93798	1.89753	1.8018	1.98413	1.85529	1.76056	1.72414	1.78891	1.64474	1.68067	1.67504	2.15983	2	1.90476	1.8315	2.36967	2.05339	1.88324	1.91939	1.85529	1.84162	1.83824	1.8797	1.84502	1.75439	1.74825	1.85874	1.71527	1.70649	1.72117	2.29885	1.99601	1.90476	1.89753	2.39808	2.04499	1.98807	2.0284	2	1.90114	1.87617	1.88679	2.00803	1.84162	1.81159	1.81488	1.98807	1.89394
176.54	2.04082	1.9685	1.90114	1.80832	1.97629	1.8622	1.77305	1.7331	1.79533	1.66389	1.67504	1.67224	2.18341	1.9802	1.90476	1.82815	2.3753	2.06186	1.86567	1.91205	1.86567	1.85529	1.84502	1.87266	1.81818	1.75747	1.74216	1.89753	1.7301	1.72117	1.72712	2.25225	1.98807	1.91205	1.89036	2.42718	2.04499	1.98807	2.04082	2.05339	1.9084	1.87617	1.87266	1.98413	1.86916	1.79856	1.83824	1.96464	1.87266
178.9	2.05339	1.91939	1.90114	1.84162	1.9802	1.8622	1.77936	1.73611	1.78891	1.66945	1.65563	1.66667	2.1692	1.9802	1.90476	1.81818	2.39234	2.07039	1.85529	1.89753	1.90476	1.84162	1.81159	1.86567	1.8315	1.77936	1.7452	1.8622	1.73611	1.70358	1.7331	2.26757	1.9685	1.91939	1.88679	2.41546	2.06612	1.98413	2.0284	2.0202	1.92678	1.89394	1.89394	1.98807	1.84162	1.77936	1.82149	1.94552	1.86916
181.27	2.02429	1.93798	1.88679	1.79211	1.98413	1.83824	1.75747	1.71821	1.78253	1.65563	1.66113	1.66945	2.1645	1.99203	1.91205	1.80505	2.38095	2.04082	1.86916	1.9084	1.88324	1.86916	1.85185	1.86916	1.82482	1.77936	1.7452	1.8622	1.73913	1.7094	1.72117	2.25734	2.00401	1.9084	1.90476	2.40385	2.06612	1.99601	2.04082	2.0284	1.91571	1.88324	1.88324	1.9802	1.81818	1.79533	1.81488	2	1.88324
183.64	2.03252	1.9305	1.89036	1.81159	1.97239	1.85185	1.74216	1.7301	1.78571	1.64474	1.67224	1.66389	2.17391	1.98413	1.89394	1.82815	2.36967	2.05339	1.87266	1.90114	1.90476	1.86567	1.85185	1.83824	1.80832	1.7762	1.74216	1.8797	1.7094	1.71527	1.72117	2.26244	2	1.91205	1.89036	2.42718	2.05339	1.99601	2	2.0284	1.91205	1.90476	1.88324	1.96078	1.82149	1.8018	1.81159	1.98807	1.88324
186.01	2.0284	1.92308	1.86916	1.8315	1.95695	1.85874	1.75439	1.74216	1.79211	1.63132	1.66113	1.66113	2.1322	2.05761	1.90114	1.8315	2.36407	2.04082	1.8622	1.90476	1.9084	1.84162	1.85529	1.83824	1.81159	1.75747	1.7301	1.85529	1.7331	1.70358	1.72414	2.20751	2	1.9084	1.89036	2.40385	2.05339	2	2.04918	2.0202	1.87266	1.88324	1.90476	1.98807	1.82482	1.80832	1.81159	1.9685	1.85874
188.38	2.01207	1.95312	1.87266	1.81488	1.97629	1.89036	1.76678	1.7301	1.78253	1.66667	1.67504	1.65563	2.1692	1.97239	1.90476	1.83824	2.34192	2.04082	1.86567	1.9084	1.8622	1.87617	1.82815	1.84843	1.81818	1.78571	1.75439	1.87617	1.72117	1.72712	1.70649	2.2779	1.99601	1.89753	1.86916	2.40964	2.05761	1.97239	2.02429	2.00401	1.91939	1.87617	1.87266	1.98807	1.8315	1.81488	1.81159	1.97239	1.85874
190.74	2.03252	1.90476	1.9084	1.81159	1.96078	1.83824	1.74825	1.71821	1.78891	1.65289	1.65563	1.64204	2.14133	1.97629	1.91571	1.81818	2.38095	2.03252	1.84843	1.89394	1.90114	1.8622	1.84162	1.8622	1.8315	1.7762	1.72712	1.85529	1.7301	1.71821	1.69491	2.24215	1.98807	1.9305	1.86916	2.3753	2.06186	1.97239	2.04499	2.04082	1.91939	1.90114	1.90114	1.98413	1.8018	1.79856	1.84162	1.94932	1.87617
193.11	2.03666	1.9305	1.89036	1.80505	1.94175	1.8622	1.77305	1.71233	1.76991	1.62866	1.67785	1.66667	2.1645	2	1.8797	1.82149	2.38095	2.06612	1.8797	1.89394	1.88679	1.85874	1.8622	1.84162	1.82815	1.7762	1.7331	1.86916	1.74825	1.7301	1.69491	2.26757	1.98807	1.9084	1.88679	2.38664	2.06186	1.99203	2.03666	2.0202	1.92308	1.86916	1.88324	1.94932	1.82482	1.78891	1.79211	1.95695	1.88324
195.47	2	1.95312	1.87266	1.81488	1.95695	1.86916	1.76991	1.72712	1.79211	1.65563	1.65837	1.65837	2.1645	1.97239	1.9084	1.80832	2.38095	2.04082	1.8622	1.90476	1.90114	1.84843	1.8622	1.83486	1.81818	1.77936	1.73913	1.86916	1.73913	1.72117	1.72117	2.22222	1.99203	1.91205	1.89753	2.42131	2.04918	1.98807	2.04918	2.02429	1.9084	1.9084	1.85529	1.97629	1.81818	1.79856	1.81159	1.94175	1.87617
197.84	2.00803	1.92308	1.89394	1.81488	1.96078	1.8315	1.76367	1.70649	1.76678	1.66945	1.66945	1.68067	2.15983	1.98413	1.89753	1.81818	2.36407	2.05339	1.86567	1.88324	1.87617	1.82815	1.84843	1.84843	1.8315	1.75131	1.76367	1.85529	1.7301	1.71527	1.72117	2.23214	1.99601	1.89753	1.88679	2.40385	2.06612	1.98807	2.01613	2	1.91571	1.89036	1.90114	1.9685	1.81488	1.80505	1.81159	1.95312	1.8797
200.2	2.01207	1.94175	1.89036	1.78891	1.95312	1.86567	1.7331	1.71527	1.79211	1.63666	1.66389	1.65563	2.15054	1.99203	1.8622	1.8315	2.36407	2.06186	1.85529	1.9084	1.89394	1.84502	1.85185	1.85185	1.81488	1.76367	1.74216	1.8315	1.72414	1.70649	1.7301	2.28833	1.99203	1.90476	1.86567	2.36967	2.05339	1.9802	2.04499	2.03666	1.9084	1.87266	1.88324	1.94552	1.81818	1.79856	1.8018	1.93798	1.91571
202.58	2.0284	1.94175	1.89394	1.82815	1.93424	1.83486	1.76678	1.72117	1.78571	1.63132	1.67785	1.67224	2.1322	1.98807	1.91571	1.84843	2.34742	2.05761	1.85185	1.89394	1.89036	1.87266	1.85874	1.82149	1.82815	1.76678	1.7452	1.84162	1.73913	1.72414	1.71233	2.25734	2.00401	1.89753	1.8797	2.38664	2.04918	2.00803	2.02429	2.04499	1.91939	1.86567	1.87266	1.97239	1.81159	1.76991	1.81488	1.93424	1.90114
204.94	2.01613	1.93424	1.89394	1.8018	1.96464	1.83486	1.76367	1.72414	1.76367	1.65563	1.66389	1.66113	2.14133	1.98807	1.88324	1.84502	2.35849	2.04499	1.85874	1.89036	1.89394	1.85185	1.82149	1.85529	1.83486	1.77305	1.72414	1.86916	1.71821	1.71821	1.72712	2.23214	1.9685	1.91205	1.87617	2.35294	2.04918	1.97629	2.0202	2.01613	1.91205	1.85874	1.88679	1.94175	1.81818	1.78571	1.83824	1.96464	1.8797
[truncated: 30 more columns]
