# Supplementary material for: Visualization of endogenous G proteins on endosomes and other organelles
Source: eLife. 2024 Nov 8;13:RP97033. doi: 10.7554/eLife.97033 (PMC11548881; doi:10.7554/eLife.97033)
Supplement: Figure 1—source data 3. [file elife-97033-fig1-data3.xlsx]

## Sheet: D2R
Time (seconds)	D2R
0	1.3259	1.2871	1.2901	1.2911	1.2562	1.2256	1.2099	1.2317	1.1772	1.1283	1.1486	1.1521	1.1733	1.1198	1.1259	1.1424
0.4	1.3185	1.2814	1.272	1.3063	1.2514	1.2212	1.2316	1.2302	1.1651	1.1153	1.1447	1.1528	1.1644	1.1416	1.1104	1.1207
0.8	1.3124	1.286	1.2679	1.3051	1.2525	1.2248	1.2152	1.2192	1.162	1.1148	1.1403	1.1471	1.1598	1.1331	1.114	1.1332
1.2	1.3179	1.2789	1.2795	1.3106	1.252	1.2276	1.2146	1.2173	1.1732	1.1278	1.133	1.1259	1.1805	1.1154	1.1258	1.1422
1.6	1.3171	1.2725	1.2782	1.3183	1.2544	1.2167	1.2181	1.2419	1.1661	1.1393	1.1099	1.1232	1.1492	1.1321	1.1364	1.1447
2	1.3173	1.2961	1.2801	1.2966	1.2541	1.2307	1.2209	1.2209	1.1715	1.1328	1.1327	1.1543	1.158	1.1206	1.1277	1.1379
2.4	1.3181	1.2901	1.2786	1.306	1.2609	1.2214	1.2238	1.2363	1.1695	1.1078	1.1442	1.1572	1.1604	1.1201	1.1234	1.1578
2.8	1.3192	1.2873	1.2736	1.2973	1.2599	1.2163	1.229	1.2258	1.1855	1.1085	1.146	1.1556	1.1585	1.1234	1.1467	1.1561
3.2	1.3245	1.2852	1.2762	1.2948	1.2616	1.228	1.242	1.2398	1.1589	1.1103	1.1225	1.1439	1.1571	1.1295	1.14	1.1366
3.6	1.3158	1.2835	1.2716	1.2884	1.2436	1.2248	1.2347	1.2444	1.1555	1.1283	1.1227	1.1575	1.1412	1.126	1.1292	1.1476
4	1.3061	1.2829	1.2774	1.2811	1.2639	1.2231	1.2086	1.2222	1.1753	1.1121	1.1445	1.1366	1.1506	1.1275	1.1408	1.1496
4.4	1.3109	1.2897	1.2852	1.3015	1.2549	1.2192	1.2355	1.2256	1.18	1.1135	1.1035	1.1413	1.1577	1.1356	1.1271	1.1472
4.8	1.3253	1.2879	1.2811	1.3036	1.2444	1.2102	1.225	1.2228	1.1594	1.1192	1.1139	1.1699	1.1561	1.1278	1.1327	1.1431
5.2	1.3095	1.2821	1.2791	1.2931	1.2506	1.2149	1.2255	1.2341	1.1609	1.1167	1.1299	1.163	1.152	1.1363	1.1491	1.1414
5.6	1.3194	1.2809	1.2741	1.3074	1.2546	1.2281	1.2219	1.2316	1.1823	1.1383	1.133	1.1571	1.1549	1.129	1.1422	1.1391
6	1.3099	1.2891	1.2831	1.3006	1.2603	1.228	1.2245	1.2163	1.1802	1.1239	1.1107	1.1471	1.1532	1.1206	1.1299	1.1431
6.4	1.3202	1.2862	1.2879	1.3142	1.2436	1.2244	1.2221	1.2443	1.18	1.1189	1.126	1.1374	1.1475	1.1117	1.132	1.1291
6.8	1.3115	1.2892	1.2794	1.309	1.2515	1.227	1.2241	1.234	1.1785	1.116	1.1205	1.1418	1.1489	1.1172	1.1367	1.1618
7.2	1.3223	1.2895	1.2811	1.3099	1.2528	1.2128	1.2281	1.2338	1.171	1.1214	1.1518	1.1362	1.1459	1.1255	1.127	1.1245
7.6	1.3236	1.2842	1.2824	1.288	1.2438	1.2127	1.2361	1.2363	1.167	1.1268	1.1255	1.1488	1.1546	1.1202	1.1381	1.14
8	1.3178	1.2871	1.2843	1.3008	1.245	1.2278	1.2133	1.2345	1.1596	1.1304	1.1459	1.159	1.1421	1.1169	1.1453	1.134
8.4	1.3184	1.2836	1.292	1.3148	1.2485	1.2191	1.2271	1.2334	1.1556	1.1262	1.1396	1.1464	1.1345	1.1271	1.1255	1.1495
8.8	1.3104	1.2948	1.2868	1.313	1.2422	1.2256	1.208	1.2346	1.1634	1.1306	1.1228	1.1477	1.1361	1.1267	1.1194	1.1215
9.2	1.32	1.2779	1.2838	1.3044	1.2456	1.2152	1.224	1.2371	1.1519	1.1301	1.1268	1.1305	1.1485	1.1234	1.1433	1.1487
9.6	1.3111	1.2792	1.2931	1.3074	1.2513	1.2142	1.2142	1.2221	1.1863	1.1107	1.1297	1.1424	1.1398	1.1259	1.1268	1.1257
10	1.3191	1.2907	1.2765	1.3002	1.2584	1.2362	1.2384	1.2317	1.1732	1.1365	1.1549	1.1309	1.1249	1.1314	1.159	1.1446
10.4	1.3387	1.3918	1.3548	1.3732	1.2833	1.3263	1.3302	1.341	1.1923	1.226	1.2513	1.2154	1.1769	1.2222	1.2328	1.2521
10.8	1.4402	1.4454	1.416	1.4224	1.393	1.3831	1.3902	1.3662	1.3092	1.2977	1.2821	1.2588	1.266	1.3	1.2808	1.2627
11.2	1.4981	1.4385	1.4323	1.4233	1.4286	1.3908	1.4043	1.3641	1.3285	1.304	1.2917	1.282	1.3432	1.3072	1.2864	1.2815
11.6	1.5119	1.4532	1.4324	1.4274	1.442	1.4125	1.4028	1.3827	1.3605	1.3198	1.3197	1.2879	1.3414	1.3035	1.2809	1.2767
12	1.5071	1.4457	1.4453	1.4393	1.4575	1.4097	1.4047	1.3771	1.3604	1.3067	1.3122	1.3054	1.3392	1.3042	1.3117	1.3023
12.4	1.5003	1.4716	1.4346	1.4123	1.4597	1.4131	1.3972	1.3751	1.3708	1.3087	1.3122	1.2929	1.3507	1.3065	1.312	1.2957
12.8	1.5155	1.4603	1.4448	1.4342	1.4569	1.4139	1.4089	1.3811	1.3554	1.3449	1.3196	1.279	1.3519	1.2986	1.3022	1.3012
13.2	1.5282	1.4767	1.4369	1.4369	1.4603	1.4075	1.4089	1.3837	1.3632	1.3042	1.3018	1.3015	1.3717	1.3295	1.298	1.2886
13.6	1.517	1.4825	1.4607	1.4271	1.4568	1.4239	1.4071	1.4039	1.3642	1.32	1.3085	1.2807	1.3741	1.3031	1.3212	1.3015
14	1.5191	1.4618	1.4431	1.4385	1.4628	1.4077	1.4086	1.3925	1.3733	1.3081	1.299	1.2895	1.3831	1.3296	1.3036	1.2787
14.4	1.5217	1.4618	1.4503	1.4418	1.4626	1.4093	1.4095	1.3773	1.3871	1.312	1.3289	1.3018	1.355	1.3148	1.3015	1.3137
14.8	1.5169	1.474	1.452	1.4338	1.4727	1.4074	1.4211	1.3967	1.3946	1.2928	1.3272	1.303	1.385	1.3445	1.3152	1.3066
15.2	1.5261	1.4598	1.4478	1.4283	1.4506	1.4218	1.4128	1.3989	1.3718	1.3345	1.3101	1.2902	1.3892	1.3318	1.3228	1.3007
15.6	1.5221	1.4561	1.4484	1.4435	1.4486	1.4239	1.4201	1.3877	1.3822	1.3175	1.3289	1.2785	1.3741	1.3286	1.3256	1.3255
16	1.52	1.4605	1.4566	1.4207	1.449	1.4206	1.3971	1.3856	1.3923	1.3142	1.3059	1.2869	1.3611	1.3255	1.2957	1.312
16.4	1.5228	1.4673	1.4417	1.4419	1.464	1.4145	1.4109	1.3947	1.3801	1.3137	1.316	1.3046	1.3659	1.3253	1.3117	1.3075
16.8	1.5175	1.4672	1.4402	1.4432	1.4621	1.4168	1.4142	1.3865	1.3825	1.3166	1.3251	1.3134	1.3576	1.3023	1.3395	1.3068
17.2	1.5171	1.4653	1.4468	1.4288	1.444	1.4014	1.4096	1.3953	1.3662	1.3382	1.3291	1.2916	1.3779	1.3121	1.3087	1.3164
17.6	1.5185	1.4599	1.455	1.4425	1.4587	1.4267	1.4148	1.3646	1.3854	1.3285	1.3132	1.2981	1.369	1.3319	1.2922	1.3114
18	1.5234	1.4705	1.4573	1.422	1.47	1.4153	1.4086	1.3844	1.389	1.3187	1.3209	1.3049	1.345	1.3344	1.3137	1.3012
18.4	1.5116	1.4642	1.4557	1.4377	1.4625	1.4195	1.4286	1.3787	1.3781	1.3454	1.3098	1.29	1.3709	1.3229	1.3098	1.3188
18.8	1.5197	1.4669	1.4464	1.4246	1.4524	1.4206	1.4151	1.3742	1.3792	1.3248	1.3335	1.2967	1.3745	1.3198	1.2963	1.3048
19.2	1.5342	1.4622	1.4513	1.4408	1.4549	1.4064	1.4063	1.3749	1.389	1.349	1.3062	1.3143	1.3881	1.3119	1.3132	1.2924
19.6	1.5177	1.4686	1.4628	1.4459	1.4532	1.4239	1.4222	1.3816	1.3619	1.3315	1.3104	1.3183	1.3745	1.3336	1.311	1.3105
20	1.5277	1.4626	1.4622	1.4124	1.4568	1.408	1.426	1.38	1.3855	1.3224	1.3165	1.302	1.352	1.3397	1.3011	1.3187
20.4	1.5378	1.4591	1.4517	1.4402	1.4733	1.4207	1.4033	1.3927	1.3766	1.323	1.3149	1.2905	1.3736	1.3378	1.3188	1.3
20.8	1.5267	1.4623	1.4465	1.4405	1.4698	1.4172	1.4179	1.3836	1.3924	1.3189	1.3057	1.3038	1.3438	1.3181	1.3106	1.3055
21.2	1.5293	1.4575	1.4375	1.4488	1.4689	1.4248	1.4115	1.3799	1.3878	1.2951	1.324	1.2889	1.3666	1.3442	1.3137	1.3133
21.6	1.5203	1.4562	1.442	1.4349	1.4666	1.4169	1.4211	1.3799	1.3976	1.3211	1.3183	1.322	1.3638	1.3328	1.3303	1.2917
22	1.5211	1.4654	1.4531	1.4278	1.4599	1.4286	1.4078	1.3891	1.3887	1.3101	1.32	1.306	1.3673	1.3318	1.2992	1.3086
22.4	1.5303	1.4586	1.4467	1.4407	1.4721	1.4057	1.4144	1.4065	1.4066	1.3309	1.3339	1.3169	1.3669	1.3163	1.299	1.3158
22.8	1.5241	1.4609	1.4503	1.439	1.4728	1.4123	1.4108	1.3943	1.365	1.3209	1.3258	1.2963	1.3692	1.3515	1.3082	1.3268
23.2	1.5346	1.4715	1.4496	1.4268	1.4639	1.4103	1.4133	1.3793	1.3808	1.3176	1.333	1.295	1.3638	1.3268	1.311	1.3225
23.6	1.5252	1.4699	1.4429	1.4433	1.4696	1.4106	1.4237	1.3926	1.3708	1.3162	1.3298	1.3087	1.3631	1.3447	1.2991	1.2782
24	1.5108	1.4672	1.4325	1.4483	1.4636	1.402	1.4164	1.3725	1.3764	1.3334	1.3218	1.2778	1.3568	1.329	1.3058	1.3055
24.4	1.5023	1.4644	1.4521	1.4374	1.4893	1.4269	1.4151	1.3866	1.3881	1.3211	1.3121	1.3089	1.358	1.3222	1.322	1.2996
24.8	1.5153	1.4678	1.4435	1.4507	1.4768	1.4104	1.4164	1.3795	1.3799	1.326	1.3177	1.3027	1.3625	1.3056	1.3031	1.3128
25.2	1.5188	1.4698	1.4394	1.445	1.468	1.4107	1.4315	1.3912	1.3876	1.3185	1.2981	1.3029	1.36	1.332	1.324	1.3279
25.6	1.5198	1.4719	1.4484	1.4314	1.4614	1.422	1.4137	1.379	1.3783	1.3264	1.3326	1.3051	1.3381	1.3368	1.3161	1.3073
26	1.5166	1.4676	1.4509	1.4448	1.4626	1.4316	1.4182	1.3866	1.3841	1.3342	1.3256	1.3026	1.3771	1.3546	1.3149	1.3116
26.4	1.5064	1.4695	1.4438	1.4383	1.4636	1.414	1.4164	1.3931	1.3825	1.2921	1.3385	1.308	1.3696	1.3296	1.3066	1.3093
26.8	1.5265	1.4647	1.4568	1.4391	1.4763	1.4148	1.411	1.383	1.3905	1.3359	1.2953	1.2985	1.3648	1.3401	1.3157	1.2937
27.2	1.5052	1.4568	1.4438	1.4416	1.4762	1.4123	1.4314	1.3961	1.3867	1.3252	1.2974	1.2997	1.3565	1.3435	1.3026	1.2996
27.6	1.5189	1.4677	1.4336	1.4266	1.4728	1.4128	1.4106	1.393	1.3767	1.3425	1.2959	1.3049	1.3498	1.2921	1.3087	1.3034
28	1.513	1.4611	1.4356	1.427	1.4843	1.4104	1.4245	1.3718	1.3936	1.3335	1.3187	1.3123	1.3683	1.3218	1.3204	1.3018
28.4	1.5092	1.4645	1.4466	1.4301	1.458	1.4274	1.4204	1.382	1.382	1.3316	1.3279	1.2886	1.3884	1.3362	1.3284	1.3163
28.8	1.5072	1.4666	1.4464	1.445	1.4788	1.4229	1.4082	1.3867	1.3573	1.3184	1.3117	1.2881	1.3534	1.3211	1.302	1.2968
29.2	1.5147	1.4681	1.4453	1.4421	1.4855	1.4087	1.4071	1.3886	1.3805	1.3217	1.3145	1.2986	1.3575	1.3422	1.3116	1.2971
29.6	1.5082	1.4681	1.4551	1.4386	1.4749	1.411	1.4116	1.4057	1.3789	1.339	1.3284	1.3029	1.3654	1.3243	1.3193	1.3104
30	1.5197	1.4511	1.4429	1.4313	1.4723	1.4076	1.4085	1.3859	1.4124	1.3032	1.3193	1.2907	1.3777	1.3194	1.3099	1.3062
30.4	1.5089	1.4477	1.4398	1.4161	1.4769	1.4121	1.3955	1.38	1.3466	1.3074	1.3133	1.2944	1.3729	1.3478	1.299	1.2733
30.8	1.5058	1.458	1.4464	1.4131	1.4559	1.4032	1.4071	1.3913	1.3723	1.3274	1.2986	1.3058	1.361	1.3221	1.3005	1.2866
31.2	1.5107	1.45	1.447	1.4107	1.4622	1.4077	1.3995	1.3775	1.3675	1.3048	1.3093	1.291	1.3476	1.3338	1.3112	1.2965
31.6	1.4897	1.4551	1.4267	1.4261	1.4542	1.4086	1.3907	1.3673	1.3684	1.2978	1.3392	1.2935	1.3636	1.3214	1.3112	1.2904
32	1.4871	1.4528	1.4383	1.4073	1.4608	1.3917	1.4079	1.3952	1.3684	1.3091	1.305	1.2729	1.3629	1.3258	1.2979	1.2906
32.4	1.4977	1.4436	1.4335	1.4095	1.4634	1.4163	1.3962	1.369	1.3509	1.3099	1.3295	1.2877	1.3578	1.3337	1.2854	1.2908
32.8	1.4929	1.4437	1.4308	1.4091	1.4766	1.3942	1.3907	1.3703	1.3628	1.3176	1.3184	1.2812	1.3354	1.3071	1.3158	1.2893
33.2	1.5058	1.4429	1.4406	1.4059	1.4609	1.3961	1.4097	1.3786	1.3663	1.3118	1.3097	1.285	1.3547	1.3067	1.3058	1.287
33.6	1.4969	1.4388	1.4361	1.4231	1.4661	1.3857	1.3888	1.3735	1.3374	1.2879	1.2909	1.2809	1.3475	1.2898	1.2966	1.2738
34	1.4872	1.4349	1.4287	1.4087	1.446	1.3889	1.3877	1.3664	1.3539	1.287	1.3054	1.2802	1.3397	1.3138	1.2888	1.3125
34.4	1.4874	1.43	1.4304	1.4148	1.4499	1.397	1.3833	1.3648	1.3667	1.3065	1.2991	1.2756	1.3562	1.3124	1.3012	1.296
34.8	1.4824	1.4408	1.4136	1.4149	1.457	1.4024	1.4003	1.3692	1.3427	1.3056	1.3007	1.2705	1.3498	1.3137	1.2863	1.2966
35.2	1.4806	1.4262	1.4356	1.4081	1.4506	1.3819	1.3843	1.375	1.3374	1.3056	1.288	1.2918	1.3446	1.3217	1.2818	1.2807
35.6	1.4772	1.4194	1.4222	1.4166	1.4585	1.3888	1.3877	1.3709	1.3497	1.2963	1.2935	1.2831	1.3501	1.3102	1.3025	1.2839
36	1.4715	1.4133	1.4278	1.397	1.453	1.3799	1.3747	1.3641	1.3639	1.3035	1.2801	1.2753	1.33	1.2993	1.2847	1.258
36.4	1.4836	1.4171	1.4187	1.3902	1.4513	1.3986	1.3723	1.3633	1.3535	1.2936	1.2888	1.2786	1.3269	1.2929	1.2918	1.2775
36.8	1.4652	1.4318	1.4096	1.4058	1.4376	1.376	1.3907	1.3626	1.3472	1.2883	1.2942	1.2956	1.3313	1.298	1.267	1.291
37.2	1.4809	1.4119	1.4038	1.4058	1.4439	1.3766	1.3692	1.3578	1.3285	1.29	1.2718	1.2754	1.3249	1.2898	1.2808	1.2898
37.6	1.4611	1.4048	1.4033	1.3987	1.438	1.375	1.3806	1.3629	1.3391	1.2799	1.285	1.2695	1.3139	1.3044	1.2922	1.2678
38	1.452	1.4164	1.4032	1.3985	1.451	1.3535	1.3813	1.343	1.3373	1.2832	1.2826	1.2613	1.3163	1.2913	1.267	1.2739
38.4	1.461	1.4162	1.4065	1.4127	1.4383	1.3564	1.3734	1.3451	1.3132	1.2721	1.2661	1.274	1.3225	1.281	1.2634	1.274
38.8	1.4418	1.3984	1.3963	1.4031	1.4431	1.3645	1.3748	1.3566	1.3201	1.2845	1.2697	1.2636	1.3346	1.2902	1.274	1.2672
39.2	1.4485	1.4111	1.3946	1.3908	1.4256	1.3704	1.3638	1.3465	1.3505	1.2603	1.2735	1.2738	1.3217	1.2858	1.2852	1.2624
39.6	1.4401	1.3995	1.3945	1.4012	1.4288	1.353	1.3698	1.3378	1.3125	1.2704	1.2661	1.2746	1.323	1.2722	1.2837	1.2667
40	1.4342	1.3973	1.3842	1.3886	1.424	1.3555	1.3644	1.3491	1.32	1.2808	1.2782	1.2697	1.3269	1.2684	1.2756	1.2624
40.4	1.4433	1.3887	1.3823	1.3819	1.413	1.3613	1.3627	1.339	1.3256	1.2712	1.2483	1.2822	1.3207	1.2938	1.2791	1.2702
40.8	1.4349	1.3901	1.3897	1.3811	1.4189	1.3561	1.3758	1.3435	1.3264	1.2557	1.2625	1.2646	1.3071	1.2721	1.2636	1.2724
41.2	1.4342	1.385	1.3746	1.3928	1.4337	1.3362	1.3346	1.3295	1.3231	1.2628	1.2587	1.2506	1.3119	1.2857	1.2634	1.2776
41.6	1.4295	1.3889	1.3794	1.3758	1.4194	1.338	1.3412	1.3426	1.3267	1.259	1.2681	1.2733	1.3097	1.2725	1.2889	1.2505
42	1.42	1.3807	1.3832	1.385	1.429	1.3361	1.3571	1.3426	1.2986	1.2662	1.2808	1.2676	1.2846	1.252	1.2683	1.2502
42.4	1.4182	1.3793	1.3825	1.371	1.413	1.3408	1.3509	1.3315	1.3046	1.2545	1.2477	1.249	1.2916	1.2705	1.2547	1.2572
42.8	1.4199	1.3708	1.3748	1.3859	1.4172	1.3323	1.3536	1.3244	1.3177	1.2428	1.2731	1.2414	1.3027	1.2587	1.255	1.2357
43.2	1.4184	1.3703	1.3769	1.3553	1.4056	1.3275	1.3459	1.3195	1.3009	1.2577	1.2556	1.266	1.3231	1.2653	1.261	1.2458
43.6	1.4136	1.374	1.3755	1.3614	1.3995	1.3362	1.332	1.3288	1.2913	1.2278	1.2511	1.2617	1.2861	1.2771	1.2431	1.2435
44	1.4061	1.3637	1.3684	1.3754	1.4001	1.3268	1.3463	1.3239	1.2787	1.2369	1.2878	1.2564	1.2918	1.2369	1.2542	1.2479
44.4	1.4085	1.3588	1.3565	1.3647	1.3976	1.3325	1.343	1.3306	1.2975	1.2564	1.2327	1.2566	1.3055	1.2514	1.2374	1.2338
44.8	1.4063	1.3533	1.359	1.3665	1.3918	1.3077	1.3414	1.3231	1.28	1.2423	1.2447	1.2566	1.2996	1.2622	1.2432	1.2511
45.2	1.3988	1.347	1.3662	1.3674	1.3989	1.3115	1.3418	1.3148	1.2805	1.2172	1.2208	1.2465	1.279	1.2375	1.2441	1.2422
45.6	1.3888	1.3428	1.3407	1.365	1.3938	1.3199	1.3353	1.3284	1.2746	1.2318	1.2339	1.2508	1.2795	1.2469	1.2481	1.2459
46	1.3988	1.3535	1.3562	1.3515	1.4018	1.3063	1.3423	1.3154	1.2947	1.2388	1.2587	1.2447	1.296	1.25	1.2705	1.2419
46.4	1.3815	1.3391	1.353	1.3781	1.4034	1.3093	1.3396	1.3085	1.2742	1.2139	1.2516	1.2472	1.2835	1.2423	1.2221	1.2495
46.8	1.3856	1.3425	1.3643	1.3338	1.3873	1.3072	1.3235	1.3214	1.254	1.209	1.2387	1.2671	1.281	1.2332	1.2683	1.2246
47.2	1.3866	1.353	1.3567	1.3358	1.3808	1.3059	1.3236	1.3301	1.2762	1.1989	1.247	1.2302	1.2705	1.2271	1.2464	1.2493
47.6	1.3764	1.3528	1.3542	1.3514	1.3701	1.3087	1.3217	1.3066	1.2649	1.2154	1.2378	1.2552	1.2809	1.2534	1.247	1.2241
48	1.3798	1.3416	1.3498	1.3546	1.3942	1.3069	1.3057	1.313	1.2794	1.2236	1.2374	1.2325	1.248	1.2643	1.2363	1.2281
48.4	1.3804	1.3385	1.3377	1.3344	1.376	1.2928	1.3173	1.3201	1.2494	1.2298	1.2447	1.252	1.2735	1.2451	1.2344	1.2175
48.8	1.3706	1.3347	1.3448	1.3364	1.3763	1.296	1.3162	1.3101	1.2639	1.2093	1.2238	1.2479	1.2993	1.2322	1.2262	1.2321
49.2	1.3574	1.3441	1.3267	1.3336	1.3718	1.299	1.3206	1.3128	1.257	1.1993	1.2333	1.2382	1.2674	1.2287	1.2169	1.229
49.6	1.3669	1.333	1.3427	1.3367	1.3756	1.3085	1.3303	1.3034	1.2734	1.2008	1.2188	1.2269	1.2661	1.2339	1.2473	1.2156
50	1.3693	1.3419	1.3189	1.3343	1.374	1.2931	1.3299	1.2987	1.2649	1.2191	1.2422	1.2416	1.2647	1.2335	1.2334	1.2391
50.4	1.3681	1.3174	1.3347	1.3271	1.3751	1.2781	1.3058	1.3	1.2645	1.2126	1.2384	1.2494	1.2508	1.2257	1.2259	1.2328
50.8	1.3594	1.3092	1.3261	1.3447	1.3751	1.2922	1.3089	1.2954	1.2438	1.229	1.2255	1.2368	1.2536	1.2312	1.2433	1.2207
51.2	1.3568	1.3158	1.3328	1.3374	1.3622	1.2836	1.316	1.2842	1.2474	1.2145	1.213	1.2271	1.2457	1.2317	1.2304	1.2123
51.6	1.3583	1.3105	1.3237	1.3262	1.3663	1.2826	1.3051	1.2999	1.2674	1.1926	1.2094	1.2293	1.2608	1.2209	1.235	1.2133
52	1.363	1.3044	1.3201	1.3339	1.3513	1.2747	1.316	1.2907	1.2635	1.1877	1.2352	1.2336	1.252	1.2401	1.2354	1.2083
52.4	1.351	1.3167	1.3245	1.327	1.3597	1.28	1.3065	1.293	1.2456	1.198	1.2257	1.2278	1.2585	1.2296	1.2027	1.2146
52.8	1.3564	1.3111	1.3229	1.3451	1.3462	1.2669	1.308	1.3028	1.2391	1.1948	1.2199	1.2361	1.259	1.2136	1.2106	1.2046
53.2	1.3449	1.3058	1.3304	1.3337	1.3634	1.2832	1.3038	1.2927	1.2348	1.202	1.194	1.2262	1.2651	1.2177	1.2149	1.2177
53.6	1.3482	1.3086	1.316	1.3314	1.3555	1.2746	1.3084	1.2948	1.2622	1.1854	1.2005	1.2324	1.2521	1.2225	1.2237	1.2309
54	1.3461	1.3125	1.3266	1.3151	1.36	1.2838	1.2916	1.2983	1.245	1.1928	1.1798	1.2211	1.2598	1.2108	1.2207	1.2274
54.4	1.3437	1.3038	1.3178	1.3194	1.3421	1.2827	1.3008	1.2944	1.2322	1.1869	1.2108	1.2176	1.2702	1.2156	1.205	1.2214
54.8	1.3399	1.3064	1.3233	1.3232	1.3511	1.2739	1.3039	1.2958	1.24	1.1887	1.1996	1.2161	1.2644	1.2361	1.2291	1.1986
55.2	1.3227	1.3043	1.3231	1.3173	1.3509	1.2814	1.3124	1.2923	1.2447	1.197	1.1931	1.2035	1.2518	1.2297	1.2144	1.2164
55.6	1.3411	1.3106	1.3179	1.2982	1.3474	1.2811	1.2963	1.2959	1.2421	1.1846	1.2107	1.2131	1.2456	1.2212	1.2227	1.2025
56	1.3395	1.3017	1.3068	1.332	1.3518	1.2672	1.2912	1.2861	1.2673	1.1933	1.2048	1.2178	1.2564	1.2158	1.2234	1.1927
56.4	1.3405	1.3053	1.3082	1.3267	1.3544	1.2686	1.2991	1.2823	1.2218	1.2013	1.2038	1.1991	1.2671	1.21	1.2219	1.2106
56.8	1.3418	1.2968	1.316	1.3154	1.3319	1.2638	1.3016	1.2758	1.2251	1.19	1.2013	1.2016	1.2526	1.221	1.2008	1.2073
57.2	1.3376	1.2962	1.3136	1.3182	1.3311	1.271	1.2846	1.2875	1.2333	1.2043	1.2026	1.2135	1.2463	1.2083	1.2103	1.2067
57.6	1.3401	1.3003	1.3294	1.3152	1.3466	1.2793	1.2832	1.2835	1.2082	1.1879	1.1816	1.2114	1.2607	1.2086	1.204	1.2227
58	1.3282	1.3035	1.3087	1.311	1.3434	1.2556	1.2968	1.2789	1.2407	1.1728	1.1829	1.2133	1.2278	1.1921	1.2068	1.2201
58.4	1.3292	1.2907	1.3289	1.3071	1.3418	1.2728	1.2885	1.2827	1.2384	1.1766	1.1733	1.2092	1.2342	1.2123	1.2051	1.2136
58.8	1.3308	1.2889	1.3118	1.3054	1.333	1.2687	1.3032	1.2707	1.2111	1.1746	1.2023	1.2113	1.2268	1.1943	1.2119	1.188
59.2	1.3344	1.2907	1.3114	1.3086	1.3242	1.2765	1.2951	1.292	1.2376	1.1846	1.1716	1.1922	1.2244	1.2	1.221	1.2293
59.6	1.3238	1.2904	1.3114	1.309	1.3398	1.2535	1.296	1.2867	1.2054	1.1801	1.1844	1.2083	1.2461	1.2106	1.22	1.1997
60	1.3262	1.295	1.317	1.3037	1.3418	1.2712	1.2847	1.2735	1.2222	1.1711	1.1754	1.2281	1.2521	1.2191	1.199	1.1809
60.4	1.3207	1.2804	1.3084	1.3129	1.3396	1.2579	1.287	1.2777	1.23	1.1902	1.1761	1.198	1.2287	1.2018	1.2078	1.2127
60.8	1.3212	1.2856	1.2899	1.3132	1.3366	1.2716	1.2823	1.2593	1.2038	1.1825	1.1866	1.2264	1.2307	1.2153	1.2143	1.2042
61.2	1.329	1.2792	1.2935	1.3131	1.3362	1.2697	1.2928	1.2811	1.2321	1.1777	1.2003	1.2208	1.228	1.201	1.2049	1.206
61.6	1.3088	1.2797	1.3013	1.3147	1.3255	1.2588	1.2803	1.2818	1.2272	1.1756	1.1909	1.2131	1.2368	1.2123	1.182	1.2214
62	1.3117	1.2914	1.3004	1.3123	1.3229	1.2595	1.2909	1.2792	1.2234	1.1708	1.1874	1.2101	1.2329	1.183	1.1977	1.1787
62.4	1.3221	1.2864	1.3009	1.3085	1.327	1.2556	1.2858	1.2607	1.214	1.1727	1.191	1.2055	1.2365	1.1856	1.1868	1.1901
62.8	1.3057	1.284	1.2977	1.3096	1.3242	1.2545	1.2807	1.2652	1.216	1.1954	1.1749	1.1808	1.2298	1.2018	1.2198	1.1991
63.2	1.3122	1.2901	1.2959	1.3081	1.3313	1.2573	1.2892	1.2786	1.2226	1.1941	1.185	1.2133	1.2293	1.2008	1.2024	1.2155
63.6	1.3187	1.2769	1.3089	1.2957	1.3283	1.2583	1.29	1.2826	1.2068	1.1767	1.1932	1.2012	1.2281	1.199	1.1819	1.1996
64	1.3266	1.2772	1.2892	1.2955	1.3307	1.2625	1.2966	1.284	1.2105	1.1827	1.177	1.203	1.2151	1.1816	1.1658	1.2069
64.4	1.3098	1.2794	1.2865	1.299	1.3347	1.2512	1.2936	1.2674	1.2072	1.179	1.1698	1.1707	1.2196	1.2044	1.2003	1.1817
64.8	1.3089	1.2817	1.3104	1.304	1.3195	1.256	1.2846	1.2667	1.2038	1.1671	1.18	1.1974	1.2183	1.2026	1.1893	1.2086
65.2	1.3129	1.2731	1.3014	1.3046	1.3066	1.246	1.2784	1.2631	1.2202	1.1744	1.1687	1.1795	1.2189	1.1967	1.1851	1.2023
65.6	1.318	1.2778	1.2989	1.3063	1.3121	1.2597	1.2812	1.2737	1.2101	1.1631	1.1743	1.1899	1.2161	1.196	1.1909	1.2007
66	1.308	1.2774	1.3043	1.2967	1.3164	1.256	1.2815	1.2657	1.211	1.1522	1.1799	1.1953	1.2303	1.2102	1.1622	1.1854
66.4	1.3158	1.2744	1.2941	1.2998	1.3171	1.2576	1.2829	1.2603	1.1916	1.1625	1.1872	1.222	1.2101	1.1945	1.188	1.184
66.8	1.3072	1.2759	1.2935	1.3048	1.3204	1.2447	1.2784	1.2954	1.2111	1.1466	1.1539	1.2087	1.2042	1.1999	1.2026	1.1892
67.2	1.2996	1.2806	1.2985	1.3007	1.3161	1.2463	1.2801	1.2768	1.2118	1.1662	1.1784	1.186	1.207	1.1912	1.2009	1.1986
67.6	1.3141	1.2682	1.28	1.2929	1.3031	1.2527	1.2686	1.2577	1.2135	1.17	1.1863	1.1949	1.2127	1.2006	1.1794	1.1943
68	1.3072	1.2716	1.2987	1.2982	1.3078	1.2547	1.2741	1.2566	1.2248	1.171	1.1825	1.1889	1.2144	1.197	1.196	1.1843
68.4	1.2979	1.2662	1.2916	1.2984	1.3057	1.2384	1.281	1.266	1.2153	1.1534	1.17	1.2073	1.2327	1.1819	1.1895	1.2005
68.8	1.2988	1.2697	1.2753	1.3061	1.3012	1.2531	1.2632	1.2554	1.1989	1.1732	1.1764	1.1956	1.2081	1.1976	1.1906	1.1944
69.2	1.3054	1.2687	1.2897	1.2924	1.3022	1.2545	1.2759	1.2758	1.2027	1.1439	1.14	1.1832	1.21	1.2116	1.1878	1.1869
69.6	1.3033	1.2678	1.2959	1.2956	1.3119	1.2413	1.267	1.2869	1.2051	1.1666	1.1607	1.1956	1.2134	1.1931	1.1909	1.1913
70	1.3162	1.2692	1.2924	1.3031	1.3201	1.2521	1.2768	1.2608	1.2091	1.167	1.1801	1.1913	1.2167	1.1867	1.1782	1.1863
70.4	1.2974	1.2676	1.2821	1.3032	1.3057	1.2423	1.2918	1.2709	1.1983	1.1742	1.1764	1.2074	1.2179	1.2008	1.1976	1.1989
70.8	1.2983	1.2609	1.2884	1.3097	1.3078	1.2642	1.2795	1.2679	1.1897	1.1728	1.1688	1.1939	1.2104	1.193	1.1892	1.1942
71.2	1.2969	1.2677	1.2806	1.3161	1.3115	1.2458	1.2888	1.2745	1.1826	1.1725	1.1774	1.1844	1.2105	1.1704	1.1753	1.193
71.6	1.3069	1.2656	1.2855	1.3028	1.3061	1.244	1.2757	1.2648	1.2077	1.1576	1.1806	1.1931	1.1984	1.1876	1.1895	1.1872
72	1.2969	1.2686	1.2868	1.3137	1.3054	1.2508	1.2639	1.2605	1.2175	1.1617	1.1742	1.1907	1.205	1.1734	1.189	1.1828
72.4	1.3041	1.2747	1.2984	1.3004	1.2996	1.2469	1.2647	1.2722	1.1985	1.1787	1.1815	1.1954	1.2085	1.2006	1.194	1.1848
72.8	1.3024	1.2669	1.2831	1.3085	1.3081	1.2576	1.2735	1.2672	1.1869	1.1746	1.1613	1.204	1.1952	1.1788	1.1837	1.1914
73.2	1.2994	1.2583	1.2833	1.2979	1.3124	1.2466	1.267	1.2636	1.2283	1.1568	1.1554	1.1989	1.2154	1.1839	1.1644	1.1908
73.6	1.2964	1.2573	1.2908	1.3068	1.3125	1.2559	1.2722	1.2752	1.211	1.1659	1.1586	1.2039	1.209	1.1935	1.182	1.2017
74	1.2995	1.2552	1.2846	1.3096	1.2868	1.2442	1.2634	1.2694	1.2047	1.1619	1.1654	1.1741	1.1931	1.1957	1.1836	1.2079
74.4	1.2986	1.2629	1.2732	1.2927	1.2926	1.2554	1.2656	1.2642	1.1795	1.1598	1.1683	1.1749	1.1992	1.1779	1.174	1.1707
74.8	1.2885	1.2586	1.2779	1.2916	1.2975	1.2417	1.2615	1.2595	1.2034	1.1579	1.1759	1.1903	1.2015	1.1827	1.187	1.1855
75.2	1.2936	1.2551	1.2721	1.3002	1.2985	1.2388	1.2736	1.2618	1.2133	1.1558	1.1822	1.2038	1.2048	1.202	1.1944	1.196
75.6	1.2948	1.2522	1.2844	1.2854	1.3074	1.2542	1.2507	1.2695	1.2092	1.1457	1.1767	1.1918	1.196	1.1868	1.1808	1.1802
76	1.2877	1.2672	1.2833	1.3038	1.2983	1.2429	1.2614	1.2565	1.2208	1.1723	1.1698	1.1916	1.2129	1.1953	1.1785	1.2003
76.4	1.2899	1.2508	1.278	1.2905	1.2931	1.2444	1.2578	1.2542	1.1993	1.1573	1.1758	1.1961	1.2018	1.1958	1.1959	1.1909
76.8	1.2941	1.2507	1.2834	1.307	1.2881	1.2377	1.2637	1.2647	1.1884	1.1577	1.1888	1.1903	1.2099	1.1891	1.1834	1.173
77.2	1.2868	1.2564	1.2749	1.2874	1.294	1.2502	1.2615	1.2621	1.2095	1.1437	1.1629	1.1897	1.2116	1.1799	1.1754	1.1899
77.6	1.2964	1.2548	1.283	1.2865	1.2832	1.2341	1.2464	1.2414	1.2068	1.1443	1.1656	1.2015	1.207	1.1938	1.1809	1.1758
78	1.2982	1.2552	1.2822	1.2947	1.2825	1.2368	1.2723	1.2741	1.1963	1.1568	1.1849	1.178	1.2108	1.1717	1.1881	1.1687
78.4	1.2915	1.2547	1.2844	1.305	1.2915	1.2247	1.266	1.2701	1.1902	1.1715	1.1635	1.182	1.2101	1.1786	1.1664	1.1789
78.8	1.296	1.2623	1.2791	1.2908	1.2915	1.2324	1.2699	1.2372	1.2071	1.1484	1.1621	1.1785	1.2084	1.1694	1.1726	1.1928
79.2	1.293	1.2548	1.2891	1.297	1.2866	1.2306	1.2675	1.2416	1.1924	1.1532	1.161	1.1959	1.2065	1.1792	1.1796	1.1608
79.6	1.2806	1.2544	1.2792	1.2933	1.2833	1.2489	1.2697	1.2284	1.2103	1.1613	1.1568	1.1914	1.2032	1.1895	1.1657	1.1809
80	1.2968	1.263	1.2867	1.2885	1.2954	1.2304	1.2545	1.2353	1.1891	1.1552	1.1403	1.2039	1.2047	1.1721	1.1887	1.1816
80.4	1.2927	1.2575	1.2841	1.2949	1.2964	1.2189	1.2566	1.2528	1.1938	1.1379	1.181	1.187	1.2031	1.1903	1.1778	1.1913
80.8	1.2921	1.2564	1.2878	1.2973	1.2937	1.2399	1.2732	1.2509	1.1951	1.1464	1.1737	1.1821	1.2075	1.183	1.172	1.1885
81.2	1.2745	1.2578	1.2836	1.2942	1.2907	1.2258	1.2659	1.252	1.1949	1.16	1.1739	1.1865	1.207	1.173	1.1781	1.1725
81.6	1.2959	1.2557	1.286	1.287	1.2791	1.2395	1.2678	1.2623	1.1957	1.1606	1.1674	1.1854	1.203	1.1782	1.1877	1.1939
82	1.2907	1.258	1.2704	1.2919	1.2881	1.2219	1.2604	1.2399	1.1874	1.1475	1.1881	1.1767	1.2125	1.1942	1.1721	1.1808
82.4	1.2902	1.266	1.276	1.2868	1.2911	1.2434	1.2732	1.2489	1.1965	1.1445	1.1776	1.1901	1.2024	1.1896	1.1739	1.1955
82.8	1.2833	1.2673	1.2796	1.2881	1.2966	1.2358	1.2506	1.2509	1.1928	1.1509	1.1665	1.1838	1.2073	1.1913	1.1684	1.1908
83.2	1.3038	1.2597	1.2698	1.2838	1.3101	1.2354	1.2426	1.2453	1.1831	1.168	1.168	1.1888	1.2051	1.2086	1.1616	1.1697
83.6	1.2853	1.2662	1.2797	1.302	1.291	1.2226	1.2522	1.2526	1.2034	1.1523	1.1839	1.1731	1.1988	1.164	1.1809	1.185
84	1.289	1.2489	1.2797	1.3048	1.2854	1.2274	1.2528	1.2459	1.2139	1.159	1.1562	1.197	1.1855	1.1534	1.1845	1.1731
84.4	1.2946	1.2657	1.2869	1.2976	1.2936	1.2448	1.2529	1.2469	1.1903	1.1654	1.1745	1.2023	1.2022	1.1773	1.171	1.1857
84.8	1.2963	1.266	1.2617	1.3055	1.2773	1.2321	1.2705	1.2514	1.1954	1.1515	1.179	1.1756	1.2121	1.177	1.1868	1.1717
85.2	1.2856	1.2504	1.2684	1.3051	1.2785	1.2341	1.2632	1.2472	1.1824	1.1554	1.1558	1.1939	1.2056	1.1725	1.1741	1.1934
85.6	1.2846	1.2474	1.2691	1.2816	1.2854	1.2252	1.2514	1.2394	1.1867	1.1405	1.1575	1.1952	1.1928	1.1718	1.1644	1.1744
86	1.2847	1.2604	1.2779	1.293	1.291	1.2419	1.2481	1.2645	1.1846	1.1534	1.17	1.1847	1.1958	1.1672	1.1687	1.2034
86.4	1.2919	1.2593	1.279	1.3001	1.2831	1.2289	1.2591	1.2618	1.2016	1.1517	1.1626	1.1898	1.1829	1.1783	1.1808	1.1755
86.8	1.2873	1.2736	1.2718	1.2934	1.2778	1.2355	1.2633	1.2569	1.1864	1.1759	1.174	1.1846	1.1794	1.1881	1.1721	1.1758
87.2	1.2947	1.2572	1.2713	1.3017	1.2899	1.225	1.2728	1.2541	1.2001	1.1569	1.1741	1.1946	1.1928	1.1697	1.1927	1.1775
87.6	1.2813	1.2514	1.2849	1.3011	1.2851	1.2267	1.2575	1.2688	1.1935	1.1547	1.1798	1.1847	1.1984	1.1765	1.1632	1.1817
88	1.2741	1.2631	1.2657	1.2835	1.2848	1.2328	1.2445	1.2701	1.1906	1.1573	1.1547	1.1892	1.1952	1.1935	1.1873	1.181
88.4	1.287	1.248	1.2697	1.2803	1.2747	1.2437	1.2387	1.2508	1.1849	1.168	1.173	1.1864	1.2059	1.1846	1.1633	1.1921
88.8	1.2763	1.2567	1.2873	1.2994	1.2689	1.2319	1.2527	1.2508	1.1857	1.1456	1.1576	1.1736	1.2055	1.1907	1.1796	1.1717
89.2	1.2843	1.2577	1.2625	1.2797	1.2726	1.2368	1.2547	1.2518	1.187	1.1461	1.1625	1.17	1.203	1.1731	1.1835	1.1822
89.6	1.2645	1.2547	1.281	1.2818	1.2746	1.2325	1.2554	1.2721	1.1987	1.1436	1.178	1.1782	1.2001	1.1827	1.1642	1.1789
90	1.2763	1.2549	1.2681	1.2759	1.275	1.2307	1.2653	1.2674	1.1967	1.156	1.1609	1.1836	1.1989	1.1752	1.1729	1.1785
90.4	1.2858	1.2478	1.2793	1.3016	1.2781	1.2208	1.2498	1.2533	1.1978	1.1653	1.1544	1.1893	1.2121	1.1918	1.1638	1.1983
90.8	1.2969	1.2576	1.2718	1.289	1.2744	1.2428	1.2623	1.2707	1.192	1.1555	1.1457	1.1866	1.1792	1.1888	1.178	1.1976
91.2	1.2824	1.2476	1.2609	1.2875	1.2713	1.2167	1.2629	1.2558	1.2083	1.1593	1.1751	1.1989	1.1868	1.1911	1.1686	1.1968
91.6	1.2774	1.2506	1.2763	1.2926	1.2792	1.2353	1.2533	1.2709	1.1839	1.1546	1.1704	1.1976	1.1912	1.1695	1.1628	1.192
92	1.2826	1.2495	1.2711	1.2898	1.2805	1.2227	1.2648	1.2592	1.1768	1.1557	1.173	1.1956	1.2034	1.1766	1.178	1.1686
92.4	1.2788	1.2571	1.2772	1.291	1.2832	1.2203	1.2638	1.2506	1.2032	1.156	1.1877	1.1906	1.1894	1.1904	1.1811	1.1753
92.8	1.2731	1.2398	1.2628	1.2861	1.2827	1.2308	1.2502	1.2534	1.2111	1.1526	1.147	1.1799	1.2074	1.1869	1.154	1.1833
93.2	1.2781	1.2413	1.2765	1.2935	1.2799	1.2244	1.2609	1.256	1.1821	1.1498	1.1484	1.1934	1.1879	1.1904	1.1669	1.1857
93.6	1.2777	1.2467	1.2756	1.2836	1.2716	1.2423	1.2517	1.252	1.1714	1.139	1.1463	1.1999	1.1911	1.19	1.1666	1.1742
94	1.2812	1.2485	1.2857	1.2796	1.279	1.2216	1.2662	1.2672	1.1977	1.1567	1.1709	1.1837	1.1809	1.1734	1.1739	1.1653
94.4	1.2796	1.2539	1.2779	1.2954	1.2819	1.2317	1.2571	1.2607	1.168	1.163	1.1655	1.1733	1.1848	1.1855	1.1822	1.1659
94.8	1.2769	1.262	1.2772	1.2922	1.2833	1.2196	1.2623	1.2532	1.1913	1.1614	1.1616	1.1972	1.1819	1.171	1.1881	1.1851
95.2	1.2819	1.239	1.2697	1.3003	1.2829	1.2269	1.2626	1.2576	1.2002	1.1806	1.1725	1.2023	1.1918	1.1631	1.1899	1.1714
95.6	1.2738	1.2583	1.2756	1.2904	1.2694	1.2209	1.2579	1.2561	1.1859	1.1594	1.1632	1.1889	1.1777	1.1643	1.1721	1.1851
96	1.2761	1.256	1.2538	1.2853	1.2683	1.2323	1.2422	1.2563	1.1878	1.1573	1.168	1.1957	1.1818	1.1892	1.1754	1.1818
96.4	1.2754	1.2527	1.2643	1.2973	1.2736	1.2252	1.2446	1.256	1.1757	1.1528	1.1707	1.1812	1.1956	1.1855	1.1557	1.175
96.8	1.278	1.2604	1.2861	1.2876	1.2781	1.2188	1.2429	1.2543	1.1983	1.1462	1.165	1.1832	1.2054	1.1711	1.1819	1.1954
97.2	1.2826	1.2389	1.2753	1.2894	1.2677	1.2308	1.2738	1.2604	1.183	1.1564	1.1697	1.1774	1.186	1.1772	1.1791	1.1824
97.6	1.2711	1.251	1.273	1.2782	1.2697	1.2291	1.2492	1.2523	1.1951	1.1373	1.1907	1.1872	1.1867	1.176	1.1941	1.1853
98	1.283	1.2545	1.2804	1.2905	1.2693	1.2253	1.2494	1.2447	1.1738	1.1554	1.1856	1.1928	1.1869	1.1764	1.1691	1.1737
98.4	1.2718	1.2546	1.2815	1.2912	1.2719	1.2288	1.2526	1.2493	1.1777	1.1527	1.1678	1.1916	1.1951	1.1736	1.1715	1.1597
98.8	1.2723	1.2427	1.2615	1.2729	1.263	1.2196	1.2519	1.25	1.1839	1.1377	1.147	1.1928	1.1932	1.1955	1.1719	1.178
99.2	1.2884	1.2442	1.2798	1.2697	1.2829	1.2217	1.2432	1.2494	1.1774	1.1481	1.1743	1.2077	1.1821	1.2016	1.1717	1.1802
99.6	1.2738	1.2477	1.2702	1.2847	1.2739	1.2167	1.2686	1.2448	1.1979	1.1558	1.1723	1.1857	1.1888	1.163	1.1699	1.1761

## Sheet: beta2AR
Time (seconds)	beta2AR
0	1.3515	1.3104	1.3401	1.3079	1.3459	1.2944	1.3023	1.3002	1.2233	1.1886	1.1855	1.1733	1.3486	1.2877	1.2418	1.2445
0.4	1.327	1.3181	1.3366	1.3264	1.3225	1.2903	1.3108	1.2872	1.2263	1.187	1.1652	1.1716	1.3333	1.2725	1.2517	1.2493
0.8	1.336	1.3323	1.3353	1.3304	1.3345	1.2972	1.3095	1.3031	1.2171	1.1851	1.1655	1.1557	1.3288	1.2721	1.2659	1.262
1.2	1.3345	1.3135	1.3422	1.331	1.3357	1.3046	1.3148	1.2877	1.2287	1.1851	1.192	1.158	1.3451	1.2624	1.2613	1.2396
1.6	1.3179	1.303	1.332	1.3228	1.3302	1.2779	1.3022	1.2944	1.2251	1.1762	1.1764	1.159	1.3408	1.272	1.2333	1.2366
2	1.335	1.3073	1.3355	1.3038	1.327	1.2782	1.3219	1.2931	1.2304	1.2089	1.1688	1.1515	1.3412	1.2611	1.2528	1.2487
2.4	1.3328	1.3261	1.3321	1.3359	1.3251	1.2987	1.313	1.2988	1.2183	1.1864	1.1814	1.1629	1.3346	1.2746	1.2537	1.2444
2.8	1.3353	1.3168	1.3214	1.3202	1.336	1.2961	1.3017	1.2935	1.2142	1.2037	1.1808	1.1782	1.3324	1.2579	1.2628	1.2404
3.2	1.3212	1.3234	1.3237	1.3197	1.3156	1.2819	1.2852	1.2894	1.2135	1.1983	1.1807	1.1705	1.3317	1.2681	1.2659	1.2462
3.6	1.3218	1.3194	1.3256	1.3181	1.3244	1.2765	1.2992	1.2975	1.2277	1.1935	1.1712	1.163	1.3255	1.2671	1.2515	1.2481
4	1.3273	1.3114	1.343	1.3233	1.307	1.2906	1.3058	1.2915	1.2131	1.1901	1.1846	1.1551	1.336	1.2646	1.2355	1.2406
4.4	1.3333	1.3242	1.3361	1.3234	1.3279	1.3128	1.2849	1.298	1.2139	1.1899	1.1824	1.1746	1.334	1.294	1.2519	1.2494
4.8	1.3279	1.3401	1.3215	1.3232	1.336	1.3003	1.3178	1.2928	1.2034	1.1921	1.1658	1.1507	1.348	1.269	1.2571	1.2527
5.2	1.3352	1.3218	1.3357	1.3234	1.3418	1.2805	1.294	1.3006	1.2143	1.17	1.178	1.1635	1.3221	1.2596	1.2426	1.2447
5.6	1.3299	1.3211	1.3302	1.3393	1.3407	1.2946	1.2894	1.2933	1.207	1.2039	1.177	1.1508	1.3274	1.2523	1.2615	1.2504
6	1.3276	1.3095	1.3324	1.3143	1.3375	1.2791	1.2945	1.2943	1.214	1.2001	1.1841	1.1617	1.3271	1.2751	1.2364	1.2612
6.4	1.337	1.3137	1.3424	1.3205	1.3294	1.3033	1.2852	1.2913	1.2166	1.1869	1.1782	1.163	1.332	1.2539	1.264	1.2388
6.8	1.3214	1.3216	1.3332	1.3416	1.3406	1.2879	1.2946	1.3003	1.2208	1.1912	1.1712	1.1626	1.3401	1.255	1.2529	1.2542
7.2	1.332	1.317	1.3344	1.318	1.3296	1.3102	1.2928	1.302	1.2133	1.1797	1.1899	1.1681	1.3302	1.2656	1.2449	1.2517
7.6	1.3222	1.312	1.3271	1.3379	1.3293	1.2867	1.286	1.2936	1.2079	1.1939	1.1897	1.1652	1.3329	1.2725	1.2539	1.2535
8	1.3164	1.3217	1.327	1.3283	1.3206	1.3144	1.3168	1.2976	1.2159	1.1779	1.172	1.1552	1.3268	1.2686	1.2429	1.2507
8.4	1.3225	1.3239	1.3088	1.3239	1.3179	1.2827	1.2937	1.2889	1.2213	1.182	1.1763	1.1718	1.3458	1.2727	1.2423	1.2452
8.8	1.33	1.319	1.32	1.3217	1.3235	1.294	1.283	1.294	1.23	1.1958	1.1658	1.1476	1.3416	1.2676	1.2402	1.2463
9.2	1.3291	1.3116	1.3287	1.3319	1.3285	1.2914	1.2946	1.3039	1.2205	1.1897	1.1741	1.168	1.3227	1.2775	1.253	1.2517
9.6	1.3274	1.3304	1.3164	1.3266	1.3288	1.2939	1.2991	1.2931	1.224	1.1984	1.1823	1.1539	1.3239	1.2798	1.254	1.2569
10	1.3257	1.321	1.3405	1.3154	1.3178	1.3092	1.2931	1.2932	1.205	1.1901	1.1953	1.1734	1.319	1.2644	1.2711	1.2422
10.4	1.3413	1.3746	1.3877	1.3858	1.3454	1.3764	1.3813	1.3787	1.2419	1.2574	1.2386	1.2161	1.3555	1.3121	1.3088	1.288
10.8	1.408	1.4124	1.4294	1.4335	1.4174	1.4316	1.4285	1.4249	1.2911	1.2921	1.2642	1.2382	1.4272	1.3591	1.3304	1.3379
11.2	1.4439	1.4432	1.447	1.4301	1.4538	1.4434	1.4522	1.4303	1.3109	1.2933	1.2875	1.2595	1.4427	1.3617	1.3536	1.332
11.6	1.4542	1.4483	1.4607	1.432	1.481	1.4499	1.4403	1.4245	1.3333	1.2992	1.2845	1.2452	1.4593	1.3782	1.3482	1.3344
12	1.4421	1.4522	1.4607	1.4484	1.4502	1.4419	1.4405	1.4403	1.3218	1.2965	1.2633	1.2813	1.4599	1.3734	1.3391	1.3469
12.4	1.4655	1.4586	1.4612	1.4382	1.4889	1.4509	1.4432	1.4217	1.3464	1.2856	1.2825	1.2692	1.466	1.3994	1.3589	1.338
12.8	1.4554	1.4442	1.4733	1.4536	1.4684	1.4333	1.4435	1.43	1.337	1.2813	1.3124	1.2719	1.4727	1.3869	1.3682	1.3367
13.2	1.4697	1.4399	1.4683	1.4508	1.4824	1.4362	1.4568	1.4402	1.3323	1.2825	1.2899	1.2654	1.4792	1.388	1.3671	1.3348
13.6	1.4491	1.445	1.4487	1.4526	1.48	1.4585	1.4351	1.4235	1.3164	1.2936	1.2979	1.2637	1.4742	1.3907	1.373	1.3428
14	1.4653	1.4313	1.4695	1.4392	1.4856	1.435	1.4247	1.4431	1.3295	1.3109	1.2892	1.2711	1.466	1.398	1.3415	1.3456
14.4	1.4678	1.4533	1.4669	1.4473	1.4663	1.4481	1.431	1.4397	1.3304	1.3006	1.2969	1.263	1.4618	1.3954	1.3547	1.3449
14.8	1.4579	1.4488	1.4516	1.4466	1.4751	1.4379	1.4369	1.4437	1.3576	1.303	1.3008	1.2794	1.4774	1.3993	1.3632	1.3443
15.2	1.4606	1.4509	1.4635	1.4451	1.4875	1.4346	1.4426	1.4447	1.3672	1.308	1.2757	1.2781	1.4819	1.3994	1.3592	1.3385
15.6	1.4621	1.4449	1.4611	1.4336	1.4769	1.455	1.4288	1.4364	1.3485	1.3081	1.2913	1.2765	1.4887	1.396	1.374	1.3469
16	1.4591	1.4589	1.4478	1.4369	1.4986	1.4519	1.4611	1.4341	1.3699	1.2889	1.2923	1.2624	1.4859	1.3947	1.3554	1.3441
16.4	1.4575	1.4447	1.4565	1.4465	1.4765	1.4627	1.4433	1.4329	1.319	1.3	1.311	1.2756	1.4656	1.3783	1.3481	1.3617
16.8	1.439	1.4587	1.4659	1.4642	1.4801	1.4375	1.4411	1.4515	1.3349	1.3072	1.2998	1.2857	1.4682	1.4048	1.3563	1.3502
17.2	1.4734	1.4436	1.4623	1.4417	1.4749	1.4563	1.4362	1.4401	1.3498	1.2957	1.2904	1.2872	1.4766	1.394	1.3653	1.3456
17.6	1.4544	1.4347	1.4832	1.4372	1.4898	1.4467	1.4304	1.4378	1.3386	1.2979	1.2924	1.2797	1.4793	1.4042	1.3795	1.3487
18	1.4721	1.4425	1.4657	1.4367	1.4855	1.4399	1.4454	1.4495	1.3371	1.3031	1.2954	1.2753	1.4813	1.3972	1.3773	1.362
18.4	1.4523	1.4418	1.4608	1.441	1.4881	1.4513	1.4399	1.4328	1.3447	1.292	1.3014	1.2757	1.4798	1.4062	1.3686	1.3533
18.8	1.4751	1.4582	1.4652	1.4447	1.4661	1.4322	1.4388	1.4461	1.3263	1.3054	1.2966	1.2666	1.4644	1.3939	1.3778	1.349
19.2	1.4742	1.463	1.4638	1.4363	1.4728	1.4356	1.4465	1.4385	1.35	1.3282	1.2784	1.2641	1.4742	1.3914	1.3672	1.3619
19.6	1.466	1.4663	1.4838	1.4413	1.5072	1.4421	1.4349	1.4533	1.3226	1.3128	1.2983	1.2671	1.4653	1.383	1.365	1.3588
20	1.4666	1.4491	1.4831	1.4394	1.4967	1.4513	1.4496	1.4468	1.3279	1.3123	1.313	1.2648	1.4696	1.4168	1.3832	1.3442
20.4	1.4641	1.4455	1.4651	1.4405	1.5036	1.455	1.4393	1.4345	1.3303	1.3148	1.2947	1.2767	1.4669	1.3817	1.3527	1.3593
20.8	1.484	1.4776	1.4588	1.4518	1.4721	1.4379	1.4408	1.4478	1.3341	1.3245	1.2866	1.2843	1.4922	1.3908	1.3805	1.3563
21.2	1.4772	1.4506	1.4707	1.4546	1.489	1.4545	1.4384	1.4423	1.3407	1.2917	1.2873	1.2702	1.4871	1.4039	1.3723	1.3667
21.6	1.4582	1.4444	1.4677	1.4448	1.4918	1.4538	1.4413	1.4371	1.3594	1.3242	1.3006	1.269	1.4795	1.399	1.3762	1.3539
22	1.4489	1.4633	1.4482	1.43	1.5024	1.4582	1.4338	1.4458	1.3577	1.3166	1.2925	1.2777	1.4864	1.3991	1.3777	1.3559
22.4	1.4659	1.4668	1.4641	1.443	1.4658	1.4319	1.452	1.4452	1.3623	1.3094	1.2841	1.2947	1.4715	1.3949	1.3778	1.3716
22.8	1.4521	1.448	1.4517	1.4691	1.4696	1.4435	1.4428	1.4392	1.3614	1.3324	1.297	1.2729	1.492	1.3983	1.3685	1.3481
23.2	1.4515	1.4584	1.4535	1.4359	1.4858	1.4313	1.4454	1.4429	1.3315	1.309	1.3023	1.271	1.4731	1.3939	1.3609	1.3507
23.6	1.4638	1.4482	1.4829	1.4386	1.485	1.4576	1.44	1.4501	1.345	1.3188	1.3	1.2819	1.4755	1.4145	1.378	1.3559
24	1.4645	1.4644	1.4669	1.4614	1.4628	1.464	1.4446	1.4412	1.3531	1.296	1.2929	1.2696	1.4666	1.3991	1.3722	1.3679
24.4	1.4641	1.4568	1.4713	1.4387	1.4773	1.4396	1.4166	1.4412	1.3392	1.3143	1.2794	1.2842	1.4733	1.3935	1.3648	1.3562
24.8	1.4619	1.4607	1.4778	1.4396	1.4777	1.444	1.4231	1.4463	1.3096	1.3041	1.2906	1.2744	1.4436	1.4003	1.3695	1.3658
25.2	1.4655	1.4629	1.4531	1.4314	1.4712	1.4431	1.4296	1.4433	1.3411	1.3069	1.2944	1.269	1.4812	1.3821	1.3726	1.3576
25.6	1.4556	1.4756	1.4688	1.4558	1.4618	1.4424	1.4352	1.4416	1.3528	1.32	1.3222	1.2747	1.4855	1.3992	1.3552	1.3713
26	1.4586	1.456	1.4617	1.4477	1.4781	1.4397	1.4088	1.4414	1.3423	1.3114	1.2881	1.2717	1.4595	1.4077	1.374	1.3409
26.4	1.4631	1.4644	1.4584	1.466	1.4792	1.4396	1.4269	1.4368	1.3387	1.2862	1.3019	1.2764	1.4714	1.3966	1.3763	1.3454
26.8	1.4616	1.46	1.4667	1.4409	1.452	1.4396	1.4498	1.4431	1.3303	1.324	1.2847	1.2832	1.4793	1.3927	1.3595	1.3421
27.2	1.4624	1.4515	1.4709	1.4481	1.4753	1.4178	1.4389	1.4479	1.3367	1.298	1.3092	1.2628	1.4634	1.393	1.367	1.3671
27.6	1.44	1.4452	1.4461	1.4426	1.4673	1.4474	1.4367	1.4464	1.345	1.3305	1.3015	1.2768	1.4694	1.3879	1.3742	1.3548
28	1.4497	1.4529	1.4613	1.4488	1.4502	1.4434	1.4503	1.4369	1.3341	1.3086	1.3149	1.2775	1.4679	1.3891	1.3694	1.3429
28.4	1.4652	1.4419	1.4631	1.4595	1.4655	1.455	1.4185	1.4514	1.3426	1.3089	1.282	1.2842	1.4856	1.411	1.3685	1.3627
28.8	1.4628	1.4361	1.4484	1.4626	1.4711	1.4262	1.4374	1.4459	1.3248	1.3031	1.2745	1.2791	1.4711	1.4073	1.3675	1.3654
29.2	1.4686	1.4435	1.4667	1.4619	1.4483	1.4424	1.447	1.4224	1.3406	1.3195	1.3046	1.2749	1.4575	1.3926	1.3674	1.3643
29.6	1.4838	1.4301	1.4501	1.4581	1.4515	1.4423	1.4405	1.4294	1.3468	1.3031	1.2903	1.275	1.4637	1.3944	1.386	1.3522
30	1.4523	1.4507	1.4402	1.4668	1.4555	1.4282	1.4527	1.4332	1.342	1.3105	1.2951	1.2673	1.4536	1.3975	1.3823	1.356
30.4	1.4534	1.4596	1.4533	1.4436	1.455	1.4473	1.4242	1.4315	1.3343	1.3156	1.3173	1.2748	1.4656	1.4016	1.3572	1.3519
30.8	1.4458	1.4628	1.4569	1.4534	1.4416	1.4195	1.4253	1.4258	1.3326	1.3043	1.2982	1.2691	1.4574	1.3855	1.3549	1.3597
31.2	1.4708	1.4302	1.4641	1.4545	1.4604	1.4264	1.44	1.4258	1.3465	1.3077	1.3025	1.2695	1.4658	1.3715	1.3602	1.3463
31.6	1.4464	1.4593	1.4532	1.4556	1.4702	1.4232	1.4278	1.4337	1.3545	1.2951	1.3016	1.2644	1.4533	1.3862	1.3739	1.3499
32	1.4515	1.4374	1.466	1.4523	1.4413	1.4228	1.43	1.4152	1.3321	1.2983	1.2838	1.2605	1.4604	1.3836	1.3636	1.346
32.4	1.4521	1.4446	1.454	1.451	1.4484	1.4271	1.4343	1.4147	1.3273	1.3178	1.2984	1.2616	1.441	1.3974	1.3571	1.3506
32.8	1.4464	1.433	1.4491	1.4498	1.4601	1.4402	1.406	1.4256	1.3204	1.307	1.2838	1.2581	1.4444	1.3782	1.3507	1.3529
33.2	1.4588	1.4485	1.4489	1.4454	1.4573	1.4252	1.4397	1.4312	1.3282	1.298	1.2817	1.2679	1.4442	1.3843	1.3549	1.3522
33.6	1.4382	1.4292	1.4501	1.4506	1.4531	1.4241	1.4252	1.424	1.3355	1.3015	1.2993	1.2534	1.4627	1.3878	1.363	1.3234
34	1.4509	1.433	1.4493	1.4284	1.4597	1.4498	1.4209	1.4345	1.3265	1.2816	1.2863	1.2715	1.4578	1.3839	1.3534	1.3565
34.4	1.451	1.4347	1.4677	1.4464	1.4538	1.4321	1.4321	1.4251	1.33	1.3022	1.2724	1.2683	1.4639	1.3901	1.3646	1.3494
34.8	1.4517	1.4378	1.4397	1.42	1.447	1.4278	1.4401	1.4205	1.3356	1.2999	1.2985	1.2662	1.4641	1.3765	1.3484	1.3314
35.2	1.4486	1.4361	1.4499	1.4164	1.4572	1.4401	1.4321	1.419	1.3375	1.314	1.2836	1.2631	1.4604	1.3965	1.3461	1.3363
35.6	1.4507	1.4526	1.4565	1.4418	1.4547	1.4417	1.4263	1.4276	1.3316	1.2923	1.3053	1.2707	1.4506	1.3849	1.3495	1.3353
36	1.4269	1.4393	1.4418	1.4412	1.4602	1.4245	1.4108	1.4236	1.3092	1.2801	1.2839	1.2705	1.4595	1.3804	1.3545	1.3511
36.4	1.4522	1.4439	1.4268	1.4374	1.4451	1.4336	1.4389	1.4338	1.3233	1.2923	1.2857	1.2561	1.4366	1.3714	1.3559	1.3478
36.8	1.4374	1.43	1.4311	1.4282	1.442	1.424	1.4142	1.4283	1.3348	1.3014	1.2781	1.2673	1.4782	1.3759	1.3438	1.3563
37.2	1.4283	1.4357	1.4373	1.4448	1.4401	1.4068	1.4331	1.432	1.3116	1.2865	1.2769	1.2636	1.4574	1.3786	1.3555	1.3489
37.6	1.4298	1.4297	1.4517	1.413	1.4386	1.4284	1.437	1.4253	1.3241	1.2901	1.2812	1.25	1.4451	1.3692	1.3421	1.3377
38	1.4267	1.4419	1.4342	1.4335	1.4404	1.4309	1.4269	1.4072	1.3186	1.2953	1.2862	1.2792	1.4271	1.3968	1.3605	1.3405
38.4	1.431	1.4215	1.4503	1.4357	1.4454	1.4341	1.4305	1.427	1.3205	1.3023	1.2742	1.2385	1.4525	1.3664	1.3394	1.3256
38.8	1.4463	1.4252	1.444	1.4331	1.4392	1.4304	1.4313	1.4226	1.3196	1.2897	1.2961	1.2599	1.4313	1.3836	1.3508	1.3427
39.2	1.4361	1.4393	1.4421	1.4426	1.4425	1.433	1.4389	1.4414	1.3328	1.3076	1.267	1.2673	1.441	1.3726	1.3629	1.3361
39.6	1.4317	1.4252	1.4451	1.4471	1.4447	1.4216	1.4221	1.4168	1.3102	1.2983	1.2808	1.2461	1.4565	1.3737	1.3404	1.3227
40	1.4409	1.4341	1.4397	1.4342	1.4504	1.4122	1.4416	1.4274	1.322	1.281	1.2884	1.2443	1.4338	1.3841	1.3393	1.3256
40.4	1.4376	1.4242	1.4331	1.4462	1.4438	1.4325	1.4329	1.42	1.3232	1.3105	1.2853	1.259	1.4324	1.3795	1.3428	1.3495
40.8	1.429	1.4374	1.4394	1.429	1.4436	1.4036	1.4286	1.415	1.3015	1.2827	1.2846	1.2617	1.4265	1.3697	1.3513	1.3219
41.2	1.4409	1.4299	1.4343	1.4469	1.4271	1.4297	1.4332	1.4108	1.3291	1.3014	1.2823	1.2675	1.4385	1.3697	1.3562	1.3383
41.6	1.429	1.4369	1.4312	1.4216	1.4185	1.4199	1.4141	1.4154	1.3164	1.2955	1.2622	1.239	1.4394	1.3645	1.3351	1.3339
42	1.4365	1.4528	1.4344	1.4527	1.4655	1.4195	1.431	1.4218	1.331	1.2835	1.2795	1.2543	1.4367	1.3704	1.345	1.3322
42.4	1.4504	1.4302	1.4343	1.4185	1.4218	1.4025	1.4283	1.4066	1.3236	1.282	1.2826	1.2559	1.4374	1.3675	1.3486	1.3284
42.8	1.4262	1.4191	1.4396	1.4339	1.436	1.4057	1.4326	1.4004	1.3094	1.2751	1.2805	1.2324	1.4214	1.3753	1.3619	1.3189
43.2	1.4333	1.4247	1.4322	1.436	1.4116	1.4003	1.4102	1.4016	1.3067	1.2839	1.2641	1.2454	1.4312	1.3644	1.348	1.3269
43.6	1.4284	1.441	1.4503	1.4255	1.428	1.4277	1.4093	1.3966	1.321	1.27	1.2557	1.2646	1.4355	1.384	1.332	1.3352
44	1.4412	1.4094	1.4372	1.4268	1.4085	1.4019	1.4301	1.4082	1.3221	1.3021	1.2628	1.2784	1.4379	1.3684	1.3527	1.3425
44.4	1.42	1.4301	1.4253	1.4226	1.4369	1.4283	1.4142	1.4108	1.2974	1.3011	1.2709	1.2667	1.4246	1.3709	1.3446	1.3405
44.8	1.4133	1.4244	1.4268	1.4152	1.4134	1.4182	1.4346	1.4165	1.3091	1.2647	1.2782	1.2434	1.4256	1.3791	1.3437	1.3144
45.2	1.4064	1.4155	1.427	1.4349	1.4471	1.3891	1.4223	1.399	1.2975	1.2761	1.2497	1.2464	1.4226	1.3636	1.3293	1.3303
45.6	1.4274	1.4211	1.4335	1.436	1.4286	1.3916	1.4023	1.3964	1.3202	1.2875	1.2679	1.2319	1.4359	1.3675	1.3381	1.3429
46	1.4123	1.4227	1.4289	1.4439	1.4371	1.4147	1.4042	1.4125	1.3254	1.2851	1.2539	1.2658	1.4247	1.3403	1.3541	1.3364
46.4	1.4235	1.4211	1.4235	1.4219	1.4243	1.4006	1.4148	1.418	1.3242	1.296	1.282	1.2422	1.4153	1.3708	1.3367	1.3223
46.8	1.4271	1.4233	1.4116	1.4267	1.441	1.4154	1.4083	1.4102	1.3057	1.2778	1.254	1.2642	1.4421	1.3736	1.3501	1.3359
47.2	1.4061	1.4317	1.4369	1.4302	1.4059	1.4268	1.3898	1.4008	1.3123	1.2703	1.2722	1.2503	1.4131	1.3757	1.3259	1.3434
47.6	1.4284	1.4332	1.4369	1.4414	1.398	1.4065	1.4257	1.4083	1.3218	1.278	1.2708	1.2559	1.4121	1.3801	1.3564	1.3302
48	1.4239	1.4307	1.4162	1.424	1.3996	1.4162	1.4128	1.3997	1.3072	1.2724	1.2604	1.2451	1.4242	1.3672	1.3446	1.3242
48.4	1.4173	1.4206	1.4021	1.4277	1.4152	1.3856	1.3936	1.4179	1.3065	1.2768	1.2532	1.2282	1.4258	1.3552	1.3298	1.3133
48.8	1.4117	1.415	1.42	1.433	1.4158	1.4061	1.4092	1.4067	1.3047	1.2887	1.2643	1.2468	1.4217	1.3671	1.3302	1.3166
49.2	1.4113	1.4112	1.4235	1.4193	1.4138	1.4073	1.3918	1.4041	1.3101	1.2803	1.2638	1.2604	1.4315	1.3683	1.3154	1.3392
49.6	1.4112	1.4087	1.4138	1.4219	1.441	1.3964	1.4054	1.4101	1.3138	1.2848	1.2664	1.2383	1.4336	1.3538	1.3506	1.3316
50	1.4068	1.4171	1.4446	1.4258	1.4167	1.3911	1.3947	1.394	1.2999	1.2571	1.2751	1.2437	1.3977	1.3671	1.3446	1.3151
50.4	1.4123	1.4058	1.4203	1.4256	1.4228	1.3994	1.4104	1.403	1.299	1.2571	1.2737	1.2501	1.4277	1.3515	1.3325	1.3236
50.8	1.4132	1.4161	1.4204	1.4251	1.3994	1.3897	1.3938	1.4142	1.3143	1.2634	1.2645	1.2493	1.4214	1.3744	1.3273	1.3251
51.2	1.3919	1.3966	1.4155	1.4156	1.4123	1.3937	1.3888	1.3968	1.3054	1.2814	1.2556	1.2451	1.4115	1.3528	1.3364	1.3149
51.6	1.4184	1.4005	1.3933	1.4341	1.3961	1.3842	1.3941	1.4132	1.2995	1.2767	1.2572	1.2395	1.4167	1.3553	1.3409	1.3242
52	1.399	1.4091	1.4016	1.4401	1.3977	1.4114	1.4119	1.4132	1.3199	1.266	1.2518	1.2564	1.4057	1.3639	1.3437	1.3211
52.4	1.4199	1.4139	1.4054	1.4141	1.4004	1.3788	1.4153	1.4033	1.3028	1.269	1.2568	1.2355	1.3817	1.353	1.3287	1.3203
52.8	1.3953	1.3937	1.4191	1.4159	1.3992	1.4065	1.4065	1.4006	1.287	1.2549	1.2559	1.2393	1.4058	1.3502	1.3343	1.3051
53.2	1.3902	1.4207	1.4021	1.4352	1.4195	1.3897	1.3835	1.4014	1.2619	1.2707	1.2551	1.2468	1.4171	1.3614	1.338	1.3368
53.6	1.4104	1.4213	1.4085	1.421	1.4058	1.3744	1.4114	1.3972	1.3073	1.2714	1.2609	1.2563	1.4182	1.3381	1.3164	1.33
54	1.4074	1.3905	1.4165	1.4273	1.4291	1.4018	1.3972	1.4052	1.2767	1.2719	1.2694	1.2272	1.4194	1.3542	1.331	1.3046
54.4	1.4033	1.4252	1.4117	1.4394	1.4027	1.4078	1.3865	1.3916	1.2727	1.2651	1.2595	1.2389	1.4216	1.3442	1.3463	1.3083
54.8	1.3834	1.3922	1.3927	1.4208	1.3913	1.3982	1.3881	1.4003	1.2838	1.2728	1.2664	1.2478	1.4004	1.3459	1.3251	1.3114
55.2	1.3924	1.4001	1.3991	1.424	1.3958	1.3982	1.3921	1.4011	1.2901	1.2632	1.2642	1.2411	1.4046	1.3443	1.3344	1.3192
55.6	1.3947	1.3967	1.4121	1.4158	1.3884	1.3983	1.3938	1.3958	1.308	1.2708	1.2559	1.2366	1.4295	1.3371	1.3251	1.3097
56	1.3959	1.3983	1.4122	1.4034	1.4069	1.364	1.3885	1.4021	1.2927	1.2602	1.2588	1.2512	1.4163	1.3385	1.3382	1.3057
56.4	1.3936	1.3981	1.4211	1.3802	1.4012	1.3951	1.3833	1.3882	1.3056	1.2757	1.2582	1.2378	1.3955	1.3364	1.3401	1.3107
56.8	1.3955	1.3967	1.4039	1.3986	1.3882	1.396	1.3957	1.3865	1.2733	1.2627	1.2607	1.2198	1.416	1.3478	1.3159	1.3156
57.2	1.3975	1.4067	1.393	1.4081	1.4179	1.3767	1.404	1.3973	1.3027	1.263	1.259	1.2379	1.3966	1.3358	1.2966	1.3073
57.6	1.3987	1.4079	1.4125	1.4095	1.4091	1.3784	1.3989	1.398	1.295	1.2641	1.2542	1.2442	1.3986	1.3312	1.3059	1.3047
58	1.3918	1.3968	1.4069	1.4104	1.4016	1.38	1.3695	1.3881	1.2681	1.2583	1.2437	1.2503	1.4076	1.3418	1.3165	1.3163
58.4	1.3764	1.4029	1.4072	1.4137	1.3818	1.3934	1.3996	1.3939	1.3071	1.2692	1.2662	1.2303	1.4202	1.3575	1.3168	1.3191
58.8	1.4004	1.4004	1.3981	1.4184	1.4002	1.3841	1.407	1.3874	1.2839	1.253	1.258	1.2288	1.4049	1.3324	1.3226	1.318
59.2	1.3971	1.3932	1.4154	1.4147	1.4011	1.3715	1.3872	1.387	1.2934	1.258	1.2533	1.2238	1.4054	1.345	1.3242	1.3144
59.6	1.3982	1.3834	1.3981	1.4186	1.4099	1.3737	1.3847	1.3823	1.2861	1.2608	1.2618	1.241	1.4074	1.3397	1.3172	1.3037
60	1.4015	1.4187	1.4101	1.4052	1.3891	1.3977	1.4045	1.3838	1.2704	1.2655	1.259	1.2225	1.3954	1.3353	1.3021	1.3107
60.4	1.3828	1.3857	1.3962	1.4066	1.4116	1.3801	1.3908	1.3701	1.2826	1.2501	1.2494	1.2242	1.3871	1.333	1.3231	1.3365
60.8	1.3913	1.4148	1.4091	1.4069	1.3928	1.3539	1.3791	1.3861	1.2889	1.2526	1.247	1.2307	1.4101	1.3422	1.2939	1.321
61.2	1.3982	1.3991	1.4098	1.393	1.3936	1.3922	1.3874	1.3853	1.2856	1.2462	1.2535	1.2341	1.3965	1.3338	1.317	1.3103
61.6	1.3968	1.4086	1.409	1.4069	1.3948	1.3923	1.3983	1.3842	1.2751	1.2457	1.2466	1.2265	1.3941	1.3458	1.326	1.3219
62	1.3862	1.3917	1.4151	1.4002	1.3949	1.3877	1.388	1.3785	1.2726	1.2592	1.2614	1.2267	1.3895	1.3459	1.3305	1.3021
62.4	1.4031	1.386	1.4122	1.4088	1.3867	1.3565	1.3983	1.3685	1.2689	1.2359	1.2537	1.2341	1.4	1.3333	1.3062	1.3147
62.8	1.3823	1.3843	1.397	1.4201	1.3849	1.3876	1.3907	1.378	1.2688	1.2622	1.2542	1.2386	1.394	1.3229	1.3071	1.3193
63.2	1.3745	1.3826	1.413	1.4142	1.3818	1.379	1.3816	1.3717	1.2819	1.2516	1.2692	1.2146	1.4018	1.3414	1.3211	1.3038
63.6	1.3899	1.3807	1.4108	1.4155	1.3793	1.3857	1.3723	1.389	1.2852	1.2644	1.2463	1.2351	1.3819	1.3386	1.3056	1.2978
64	1.3969	1.3894	1.4092	1.405	1.3826	1.3687	1.3975	1.3762	1.2635	1.2664	1.2449	1.212	1.3765	1.3318	1.2945	1.3037
64.4	1.3732	1.4059	1.4081	1.3985	1.3947	1.3805	1.379	1.3734	1.2771	1.2626	1.2424	1.2415	1.4012	1.3371	1.3054	1.2973
64.8	1.3945	1.3947	1.3951	1.4033	1.4036	1.3732	1.381	1.388	1.2496	1.2329	1.2551	1.2306	1.3762	1.3227	1.3213	1.319
65.2	1.3838	1.3806	1.4115	1.3923	1.3988	1.3765	1.3939	1.3716	1.266	1.255	1.2372	1.2332	1.3785	1.3446	1.3136	1.3135
65.6	1.3746	1.3794	1.4091	1.3819	1.3948	1.3782	1.3741	1.378	1.2762	1.2591	1.256	1.2361	1.374	1.3181	1.3311	1.3176
66	1.3718	1.3857	1.3841	1.4095	1.3979	1.3707	1.3811	1.3897	1.2857	1.2635	1.2505	1.2314	1.3749	1.3427	1.3151	1.3074
66.4	1.3882	1.4112	1.4018	1.3938	1.3837	1.3741	1.3792	1.3686	1.2886	1.2421	1.2462	1.2347	1.3875	1.3229	1.3184	1.3282
66.8	1.3922	1.3884	1.4092	1.3905	1.3726	1.3684	1.3834	1.3799	1.2792	1.2614	1.2617	1.2242	1.377	1.3278	1.3054	1.3
67.2	1.3718	1.3896	1.3956	1.401	1.3899	1.3736	1.3805	1.3661	1.2577	1.2627	1.2401	1.21	1.3895	1.3147	1.3088	1.3036
67.6	1.375	1.38	1.3936	1.3902	1.3762	1.3715	1.3829	1.3726	1.2754	1.2524	1.2363	1.2358	1.3788	1.3315	1.3247	1.3023
68	1.3779	1.3711	1.3908	1.4068	1.3668	1.3583	1.3809	1.3713	1.284	1.2644	1.2416	1.232	1.3693	1.3357	1.3053	1.2972
68.4	1.3708	1.3814	1.3936	1.3857	1.3755	1.3682	1.3702	1.3674	1.2778	1.2676	1.2533	1.2352	1.3832	1.3454	1.3066	1.294
68.8	1.3776	1.3769	1.3983	1.3843	1.3765	1.3653	1.3917	1.3642	1.271	1.2586	1.2474	1.2106	1.3895	1.3398	1.3144	1.299
69.2	1.3626	1.3771	1.3924	1.3952	1.3713	1.3743	1.3885	1.3806	1.2763	1.239	1.2717	1.2432	1.3744	1.3262	1.3121	1.3167
69.6	1.3621	1.383	1.4007	1.4054	1.3925	1.3758	1.3876	1.3793	1.2767	1.2449	1.2349	1.2127	1.3728	1.3117	1.3122	1.3026
70	1.3664	1.3944	1.4064	1.4076	1.3637	1.3679	1.3777	1.3717	1.2576	1.2349	1.235	1.2037	1.3885	1.3211	1.3266	1.2765
70.4	1.3744	1.3812	1.3945	1.4017	1.3843	1.363	1.3815	1.3477	1.25	1.2451	1.2226	1.2343	1.3973	1.3284	1.3154	1.3
70.8	1.3598	1.3751	1.402	1.4083	1.3859	1.3688	1.379	1.3605	1.272	1.2389	1.2386	1.2115	1.3804	1.2939	1.311	1.3158
71.2	1.3808	1.3778	1.3996	1.4058	1.3841	1.358	1.3784	1.3684	1.2473	1.2431	1.2507	1.2496	1.392	1.3222	1.3033	1.3077
71.6	1.3765	1.397	1.3939	1.3903	1.3787	1.3518	1.3868	1.3763	1.2699	1.244	1.2582	1.227	1.3892	1.3177	1.3064	1.3061
72	1.3652	1.388	1.3816	1.3894	1.3769	1.3749	1.3786	1.362	1.2792	1.2412	1.2415	1.2136	1.3757	1.3002	1.3167	1.3086
72.4	1.3736	1.3795	1.4022	1.384	1.3767	1.3745	1.3889	1.3586	1.2692	1.2535	1.2505	1.2402	1.37	1.3292	1.311	1.302
72.8	1.3626	1.382	1.3959	1.3985	1.3889	1.3434	1.3701	1.3687	1.27	1.2427	1.2444	1.2199	1.3608	1.3331	1.3008	1.3072
73.2	1.3689	1.3799	1.3852	1.3906	1.3793	1.3723	1.3731	1.3697	1.259	1.2459	1.2497	1.215	1.3711	1.3202	1.3227	1.2973
73.6	1.3751	1.3683	1.4019	1.3673	1.3954	1.3709	1.3732	1.3747	1.2693	1.252	1.2496	1.2142	1.3605	1.3141	1.2984	1.286
74	1.357	1.3628	1.3996	1.4028	1.359	1.3656	1.3759	1.3668	1.2498	1.2484	1.2285	1.2124	1.3699	1.3	1.3113	1.2937
74.4	1.3657	1.3727	1.3849	1.3878	1.3844	1.3584	1.3709	1.365	1.2515	1.245	1.239	1.2204	1.3716	1.3285	1.3238	1.2994
74.8	1.368	1.3755	1.3972	1.4062	1.3847	1.3761	1.3709	1.3679	1.2597	1.2372	1.2481	1.2139	1.393	1.3151	1.3044	1.2846
75.2	1.363	1.3832	1.3897	1.3976	1.3702	1.3651	1.3835	1.3657	1.2608	1.2386	1.24	1.2243	1.3761	1.3169	1.3111	1.2978
75.6	1.3661	1.3708	1.3816	1.4005	1.3728	1.3469	1.3818	1.3567	1.2464	1.2447	1.2405	1.1918	1.3546	1.3268	1.3061	1.2852
76	1.3435	1.3823	1.3854	1.3722	1.3622	1.3503	1.3815	1.3679	1.2646	1.2421	1.2554	1.218	1.3513	1.319	1.3039	1.3137
76.4	1.3751	1.3871	1.3891	1.377	1.3745	1.3576	1.3743	1.3586	1.2573	1.2441	1.2442	1.22	1.3715	1.3343	1.2886	1.2968
76.8	1.3582	1.3683	1.3766	1.3983	1.3687	1.3646	1.3799	1.3637	1.2648	1.2365	1.2308	1.2234	1.356	1.3232	1.3221	1.3106
77.2	1.3535	1.3787	1.384	1.3837	1.3561	1.355	1.3747	1.364	1.2509	1.2239	1.241	1.2291	1.3666	1.3335	1.3168	1.2936
77.6	1.3675	1.3692	1.3906	1.3902	1.3827	1.3426	1.3656	1.3718	1.2566	1.2131	1.2439	1.2209	1.3617	1.3047	1.2965	1.2884
78	1.3531	1.3741	1.3931	1.3871	1.371	1.369	1.3638	1.3593	1.2572	1.2315	1.2323	1.2137	1.3435	1.3123	1.2882	1.3113
78.4	1.3643	1.3732	1.3786	1.3912	1.3574	1.3408	1.3769	1.3614	1.2418	1.2387	1.23	1.1945	1.3776	1.3074	1.3212	1.3002
78.8	1.3771	1.3835	1.3694	1.3681	1.36	1.3658	1.3834	1.3839	1.2649	1.2419	1.2385	1.2133	1.3644	1.3293	1.3025	1.2886
79.2	1.3667	1.3694	1.3698	1.3873	1.3609	1.3577	1.3733	1.3638	1.264	1.2106	1.2366	1.2172	1.3776	1.3303	1.2893	1.3019
79.6	1.3777	1.3818	1.3704	1.3863	1.3564	1.3641	1.3719	1.3637	1.2604	1.2325	1.2377	1.2197	1.3598	1.3032	1.3031	1.2872
80	1.3591	1.3828	1.3804	1.3818	1.359	1.3614	1.3707	1.356	1.2869	1.2625	1.2321	1.1999	1.3577	1.3241	1.2896	1.2917
80.4	1.3572	1.3768	1.3684	1.3804	1.3629	1.3636	1.3778	1.3549	1.2583	1.2468	1.243	1.2396	1.3694	1.3148	1.3106	1.2851
80.8	1.3758	1.378	1.3997	1.3864	1.3598	1.3566	1.3525	1.3584	1.2529	1.2464	1.2451	1.2009	1.375	1.3038	1.2939	1.2912
81.2	1.3619	1.3838	1.4061	1.3746	1.3671	1.374	1.3683	1.3537	1.259	1.24	1.2327	1.2049	1.3733	1.3208	1.2997	1.2937
81.6	1.375	1.3864	1.3799	1.3915	1.3653	1.3683	1.3711	1.3501	1.2773	1.2358	1.2154	1.2412	1.3765	1.2855	1.3014	1.2903
82	1.3445	1.3797	1.3766	1.3774	1.3845	1.3435	1.3663	1.3661	1.2405	1.2159	1.239	1.2357	1.3528	1.3348	1.3089	1.3023
82.4	1.3695	1.3703	1.3625	1.3714	1.356	1.3495	1.3802	1.3624	1.2503	1.2484	1.24	1.2096	1.3674	1.3117	1.2882	1.2841
82.8	1.3566	1.3753	1.3622	1.3806	1.3656	1.3751	1.3752	1.3642	1.2763	1.2354	1.2407	1.2179	1.3607	1.2986	1.3027	1.2763
83.2	1.3604	1.3562	1.3764	1.3734	1.3438	1.3418	1.3766	1.3639	1.2598	1.2428	1.2387	1.2134	1.3706	1.3085	1.2898	1.277
83.6	1.3728	1.3669	1.3825	1.3775	1.3695	1.372	1.3704	1.3518	1.2625	1.2166	1.2224	1.2009	1.378	1.3226	1.2943	1.2852
84	1.3686	1.379	1.3666	1.3848	1.375	1.3677	1.3714	1.3444	1.2456	1.2202	1.2442	1.2142	1.383	1.3141	1.3028	1.2827
84.4	1.3577	1.3682	1.3939	1.3817	1.3761	1.3551	1.3683	1.3569	1.2604	1.2448	1.2246	1.2145	1.3839	1.306	1.2986	1.2843
84.8	1.3737	1.3785	1.4021	1.3665	1.3611	1.3629	1.3702	1.3474	1.2554	1.2433	1.2419	1.2208	1.3719	1.3184	1.3005	1.3032
85.2	1.367	1.3524	1.3951	1.3795	1.3861	1.3695	1.361	1.3395	1.2657	1.2212	1.2338	1.2154	1.3556	1.3148	1.3049	1.2804
85.6	1.3586	1.3786	1.3826	1.3777	1.3571	1.3664	1.3664	1.3626	1.2643	1.2314	1.2435	1.2168	1.3655	1.3076	1.282	1.2878
86	1.3571	1.3682	1.3724	1.3634	1.365	1.3661	1.3572	1.3656	1.2513	1.2054	1.2293	1.239	1.3657	1.305	1.2837	1.2985
86.4	1.3605	1.3767	1.3595	1.3559	1.3655	1.3511	1.376	1.3573	1.2687	1.2438	1.2354	1.1963	1.3591	1.3071	1.3082	1.2917
86.8	1.3789	1.3601	1.3653	1.3702	1.3557	1.358	1.3606	1.3558	1.2559	1.2244	1.2347	1.2084	1.3703	1.3192	1.2764	1.2861
87.2	1.3675	1.3615	1.3664	1.3758	1.3605	1.3578	1.3673	1.3622	1.246	1.2228	1.2398	1.2173	1.3519	1.3063	1.2983	1.2973
87.6	1.3552	1.3578	1.3688	1.3831	1.3615	1.3389	1.3661	1.3505	1.2443	1.2315	1.2287	1.1965	1.3421	1.3122	1.3029	1.2754
88	1.3603	1.3474	1.3827	1.3862	1.3631	1.3487	1.3624	1.3625	1.2574	1.2236	1.2226	1.2224	1.3583	1.3102	1.2813	1.3013
88.4	1.3767	1.3644	1.3708	1.3702	1.3605	1.3646	1.3592	1.3306	1.2581	1.2296	1.2272	1.2029	1.3621	1.3126	1.276	1.2626
88.8	1.3668	1.3657	1.371	1.3716	1.3587	1.3647	1.3603	1.3477	1.2483	1.2336	1.223	1.1886	1.3386	1.3119	1.2875	1.2828
89.2	1.3424	1.3666	1.3656	1.3719	1.3555	1.3358	1.3667	1.3439	1.2513	1.2311	1.2359	1.2214	1.3484	1.3032	1.3027	1.2931
89.6	1.3725	1.3653	1.3586	1.3737	1.3486	1.3488	1.3414	1.3378	1.2791	1.239	1.2131	1.221	1.3459	1.3002	1.2912	1.2872
90	1.3707	1.3675	1.3664	1.3686	1.3691	1.3326	1.3603	1.3564	1.231	1.2322	1.2195	1.2068	1.3642	1.2989	1.3172	1.2931
90.4	1.359	1.3621	1.3491	1.3721	1.3856	1.3331	1.3593	1.3472	1.2544	1.2302	1.216	1.212	1.3495	1.3061	1.2943	1.2898
90.8	1.3534	1.3708	1.3806	1.385	1.3488	1.3436	1.3628	1.3483	1.2532	1.2349	1.2266	1.2031	1.3592	1.305	1.2928	1.2864
91.2	1.3461	1.3623	1.3792	1.3789	1.3453	1.338	1.3568	1.3439	1.2477	1.2466	1.2211	1.2002	1.3421	1.2962	1.2874	1.2776
91.6	1.3727	1.3704	1.3752	1.3706	1.3633	1.3576	1.3787	1.345	1.2242	1.2353	1.2036	1.2111	1.3796	1.2987	1.2883	1.286
92	1.355	1.3774	1.3739	1.3834	1.3608	1.3534	1.3581	1.3499	1.2615	1.2296	1.2156	1.2189	1.3456	1.2967	1.3078	1.294
92.4	1.3793	1.3647	1.3623	1.3933	1.3608	1.3467	1.3711	1.3522	1.2554	1.2364	1.2174	1.211	1.3543	1.3101	1.2852	1.2782
92.8	1.3482	1.373	1.3729	1.3871	1.3351	1.355	1.3665	1.3546	1.2441	1.2247	1.2114	1.2205	1.324	1.2881	1.2927	1.2914
93.2	1.3678	1.3617	1.3675	1.3841	1.3518	1.3511	1.3636	1.3597	1.2446	1.2202	1.2259	1.226	1.3428	1.3042	1.2935	1.284
93.6	1.3529	1.3651	1.373	1.3773	1.3587	1.3385	1.3643	1.3478	1.2662	1.2237	1.2283	1.2106	1.362	1.295	1.2734	1.2785
94	1.3677	1.3691	1.3639	1.3825	1.337	1.355	1.3697	1.3443	1.2489	1.2294	1.2178	1.2242	1.3576	1.3022	1.278	1.276
94.4	1.354	1.3577	1.3634	1.3839	1.3498	1.3359	1.3639	1.3514	1.2747	1.2369	1.2085	1.2019	1.3602	1.3108	1.2946	1.2871
94.8	1.3459	1.3697	1.3689	1.3791	1.353	1.3423	1.3651	1.3499	1.2606	1.2318	1.2265	1.2113	1.3485	1.3188	1.2995	1.3041
95.2	1.3705	1.3645	1.3688	1.3687	1.3456	1.3492	1.3381	1.354	1.2544	1.2393	1.2194	1.1989	1.3385	1.3097	1.2808	1.2858
95.6	1.3623	1.3551	1.3718	1.3655	1.3475	1.3435	1.3712	1.3579	1.2548	1.2271	1.2026	1.2159	1.3482	1.2886	1.2975	1.288
96	1.3543	1.3627	1.3799	1.3872	1.3404	1.343	1.3569	1.3546	1.2518	1.2241	1.2358	1.2072	1.3427	1.3123	1.3056	1.2879
96.4	1.3496	1.3872	1.3751	1.3789	1.3398	1.3438	1.3563	1.3459	1.2508	1.2393	1.2389	1.2039	1.351	1.308	1.2834	1.2724
96.8	1.3749	1.3836	1.3741	1.3682	1.3605	1.3592	1.3536	1.3443	1.2469	1.225	1.2155	1.2161	1.3538	1.2981	1.2915	1.2661
97.2	1.3424	1.3759	1.3662	1.374	1.3363	1.3372	1.3588	1.3427	1.2568	1.2361	1.2179	1.1788	1.3415	1.3119	1.2877	1.2836
97.6	1.3606	1.3779	1.3628	1.369	1.3499	1.3312	1.3572	1.3562	1.2411	1.2345	1.2213	1.2085	1.3515	1.2924	1.2902	1.2993
98	1.3539	1.3621	1.3668	1.3665	1.3505	1.3394	1.3642	1.3428	1.2531	1.2312	1.2203	1.2039	1.3533	1.2854	1.2827	1.2854
98.4	1.3485	1.3753	1.3737	1.3814	1.3301	1.339	1.3597	1.3532	1.2466	1.2281	1.2241	1.2146	1.3672	1.2906	1.2824	1.2823
98.8	1.3508	1.3695	1.358	1.3824	1.3663	1.3582	1.3594	1.3432	1.2429	1.2211	1.2269	1.217	1.335	1.3008	1.2952	1.2691
99.2	1.3621	1.3737	1.3614	1.3776	1.3474	1.338	1.3616	1.3377	1.2254	1.219	1.2168	1.2061	1.3387	1.2995	1.2903	1.2906
99.6	1.3533	1.3594	1.3687	1.3889	1.343	1.3411	1.3504	1.3483	1.253	1.2363	1.2256	1.1974	1.3408	1.3053	1.3031	1.2765

## Sheet: M3R
Time (seconds)
0	1.1525	1.1318	1.1453	1.1621	1.1344	1.1111	1.1175	1.1293	1.0653	1.0235	1.0523	1.0373	1.0323	1.065	1.0511	1.0773
0.4	1.1414	1.1261	1.1447	1.158	1.144	1.116	1.116	1.1288	1.065	1.0223	1.0421	1.0508	1.0268	1.0662	1.04	1.062
0.8	1.1457	1.1252	1.1444	1.1554	1.1409	1.1121	1.1244	1.1405	1.055	1.0296	1.0033	1.0364	1.0274	1.0635	1.029	1.0541
1.2	1.148	1.1283	1.1469	1.1558	1.1355	1.1193	1.1155	1.1281	1.0494	1.0238	1.0177	1.0177	1.0232	1.0629	1.0364	1.0696
1.6	1.1429	1.1275	1.1397	1.1518	1.1252	1.1152	1.1144	1.1189	1.0338	1.0316	0.9996	1.0047	1.0364	1.0532	1.0441	1.0839
2	1.1391	1.1253	1.1462	1.1571	1.1445	1.117	1.1177	1.1368	1.0482	1.0374	0.9974	1.0129	1.0234	1.0653	1.0305	1.0612
2.4	1.1413	1.1228	1.1503	1.1646	1.1295	1.1156	1.1243	1.1272	1.0578	1.0272	1.0145	1.0119	1.0336	1.0617	1.0317	1.073
2.8	1.1417	1.1253	1.1347	1.1602	1.1385	1.1239	1.1215	1.1414	1.0448	1.0219	1.0077	1.003	1.0196	1.057	1.0432	1.0539
3.2	1.1422	1.1316	1.1401	1.1583	1.1438	1.1132	1.1211	1.1342	1.0499	1.0265	1.007	1.0038	1.0439	1.0739	1.0444	1.0626
3.6	1.1516	1.1292	1.1415	1.1568	1.1406	1.1109	1.1232	1.1301	1.0385	1.0268	1.0011	1.0073	1.0275	1.0537	1.0377	1.0469
4	1.1467	1.1297	1.1473	1.1591	1.1431	1.1197	1.1265	1.1334	1.0499	1.0399	1.0021	1.0066	1.0195	1.0641	1.051	1.0569
4.4	1.1435	1.1343	1.1484	1.1591	1.138	1.1132	1.1288	1.1315	1.0428	1.044	1.0164	1.0089	1.0437	1.0681	1.0361	1.0598
4.8	1.1368	1.1282	1.1435	1.1648	1.1411	1.1268	1.1285	1.1287	1.0469	1.0361	1.008	1.0242	1.0213	1.0617	1.0407	1.0593
5.2	1.1412	1.1309	1.1463	1.1611	1.1337	1.113	1.1203	1.1279	1.0572	1.0356	0.9985	1.0107	1.0262	1.0766	1.0461	1.062
5.6	1.1427	1.1336	1.1443	1.1585	1.1395	1.1139	1.1144	1.1264	1.0629	1.0308	1.0221	1.0088	1.0324	1.0639	1.0482	1.0663
6	1.1395	1.134	1.1449	1.1584	1.1395	1.1154	1.121	1.1292	1.0557	1.0219	1.011	1.0148	1.0355	1.0694	1.0442	1.0571
6.4	1.1402	1.1304	1.1451	1.1628	1.1321	1.1166	1.1252	1.1288	1.0455	1.0306	1.0034	1.0139	1.0265	1.0676	1.0474	1.0592
6.8	1.1479	1.1222	1.1435	1.1608	1.1355	1.1226	1.1278	1.1252	1.0519	1.0253	0.9957	1.0026	1.0243	1.0662	1.0485	1.0581
7.2	1.1384	1.1344	1.1441	1.159	1.1343	1.1143	1.1168	1.1286	1.0417	1.0354	1.0034	1.0282	1.0135	1.0522	1.0362	1.0636
7.6	1.1445	1.1292	1.1341	1.166	1.1307	1.1135	1.1218	1.1319	1.0461	1.0271	1.008	1.0063	1.0393	1.0546	1.0388	1.0673
8	1.1407	1.1214	1.1462	1.1647	1.1351	1.1099	1.1199	1.129	1.0437	1.0347	1.0098	1.0192	1.0233	1.0658	1.0405	1.0715
8.4	1.1294	1.1319	1.1419	1.144	1.1358	1.1146	1.1269	1.1238	1.0491	1.0309	1.0198	1.0088	1.0266	1.0562	1.0341	1.0656
8.8	1.1419	1.1311	1.1408	1.1611	1.1353	1.1197	1.1179	1.1305	1.0476	1.0392	1.0093	1.0165	1.0182	1.0425	1.0361	1.0623
9.2	1.1491	1.1263	1.1496	1.1669	1.1354	1.1201	1.1255	1.1333	1.0369	1.0254	1.0303	1.0136	1.0233	1.0646	1.0458	1.0777
9.6	1.1431	1.1372	1.155	1.1651	1.1313	1.1176	1.12	1.1235	1.0517	1.033	1.0449	1.0087	1.0219	1.0657	1.0501	1.064
10	1.1397	1.1339	1.1454	1.1607	1.14	1.1205	1.1322	1.1333	1.0538	1.0398	1.0532	1.0173	1.0261	1.0671	1.0304	1.0667
10.4	1.1445	1.1629	1.1716	1.1982	1.1433	1.1617	1.1688	1.1849	1.0589	1.068	1.094	1.057	1.0358	1.0991	1.0894	1.0996
10.8	1.1748	1.2121	1.2206	1.2467	1.187	1.2021	1.2203	1.2209	1.087	1.0958	1.1282	1.0856	1.0682	1.1335	1.119	1.1391
11.2	1.2066	1.2333	1.2489	1.2773	1.2223	1.2175	1.2413	1.2549	1.116	1.1242	1.1583	1.1175	1.1028	1.1535	1.1514	1.1692
11.6	1.2274	1.2449	1.2606	1.2888	1.2408	1.2465	1.2485	1.2699	1.1405	1.1375	1.1674	1.1395	1.1262	1.1789	1.1596	1.1781
12	1.2522	1.2565	1.2809	1.3061	1.2534	1.2547	1.2665	1.2837	1.152	1.1592	1.1753	1.1445	1.1293	1.1713	1.1779	1.1913
12.4	1.2644	1.272	1.2855	1.3096	1.2676	1.2698	1.2785	1.2965	1.154	1.1523	1.1858	1.1546	1.1466	1.1858	1.1801	1.201
12.8	1.2774	1.2761	1.285	1.3282	1.2797	1.2678	1.2891	1.3045	1.1731	1.1608	1.2011	1.1741	1.1385	1.1936	1.1664	1.2056
13.2	1.2848	1.2743	1.3004	1.3283	1.2821	1.2788	1.2927	1.3103	1.1665	1.1641	1.1988	1.1641	1.1629	1.2061	1.1971	1.2247
13.6	1.2835	1.3009	1.3041	1.3334	1.2992	1.2901	1.2899	1.3139	1.1744	1.1699	1.1978	1.1644	1.1715	1.2138	1.197	1.2151
14	1.29	1.2938	1.3103	1.3492	1.3038	1.2941	1.3103	1.3122	1.1622	1.1762	1.2063	1.1673	1.1626	1.202	1.1865	1.2214
14.4	1.3099	1.2988	1.312	1.3482	1.3103	1.2938	1.3147	1.3396	1.1911	1.1719	1.2064	1.1738	1.1645	1.228	1.2057	1.2092
14.8	1.3119	1.3036	1.325	1.3508	1.3165	1.3066	1.3187	1.337	1.1877	1.1673	1.2073	1.1922	1.1715	1.2121	1.2171	1.2231
15.2	1.3103	1.3187	1.3308	1.3682	1.3146	1.3034	1.3199	1.3396	1.195	1.1809	1.2158	1.1698	1.176	1.2222	1.2065	1.2291
15.6	1.3116	1.3112	1.335	1.3666	1.3172	1.3109	1.3289	1.3427	1.1943	1.1824	1.2151	1.1809	1.1815	1.2274	1.2229	1.2389
16	1.3256	1.3166	1.3411	1.3722	1.3285	1.3041	1.3277	1.3457	1.1993	1.1862	1.2162	1.1945	1.1896	1.237	1.2269	1.2286
16.4	1.324	1.3177	1.3444	1.3709	1.3293	1.3076	1.3316	1.3473	1.1933	1.1989	1.2191	1.1874	1.1746	1.2103	1.2067	1.2465
16.8	1.3315	1.3216	1.3339	1.3678	1.3258	1.3182	1.3392	1.3638	1.1925	1.1796	1.2095	1.1819	1.1977	1.2273	1.2245	1.253
17.2	1.3252	1.3279	1.3302	1.3807	1.3313	1.3245	1.3407	1.3519	1.1975	1.1846	1.2218	1.2071	1.1898	1.2192	1.2244	1.257
17.6	1.3257	1.3229	1.3461	1.3829	1.3344	1.3213	1.3428	1.3622	1.2112	1.1877	1.2226	1.2018	1.192	1.2232	1.2423	1.2515
18	1.3419	1.3364	1.3567	1.3878	1.3393	1.314	1.3476	1.3604	1.2017	1.197	1.2154	1.1962	1.2056	1.2341	1.198	1.2479
18.4	1.3419	1.3296	1.3442	1.388	1.3435	1.3245	1.3432	1.3612	1.1936	1.1956	1.2189	1.207	1.2003	1.2148	1.2448	1.2581
18.8	1.3401	1.3352	1.3666	1.3939	1.3504	1.3345	1.3519	1.3649	1.2234	1.1898	1.2355	1.2018	1.197	1.21	1.2378	1.2571
19.2	1.3451	1.3375	1.3619	1.3889	1.351	1.3282	1.3462	1.3753	1.213	1.186	1.2406	1.1867	1.1955	1.2252	1.2265	1.268
19.6	1.3476	1.3354	1.3604	1.3858	1.3471	1.3382	1.3449	1.3728	1.2155	1.2048	1.2453	1.2088	1.1917	1.217	1.2185	1.2531
20	1.3446	1.3416	1.3568	1.3923	1.3503	1.3292	1.3471	1.3637	1.2098	1.1994	1.2375	1.2042	1.214	1.2438	1.2287	1.2701
20.4	1.3418	1.3434	1.3706	1.397	1.3521	1.3294	1.3578	1.3707	1.2173	1.1993	1.2442	1.224	1.1991	1.2428	1.2451	1.2703
20.8	1.3511	1.3358	1.3647	1.405	1.3457	1.3358	1.3556	1.3737	1.2126	1.2011	1.2256	1.2106	1.1899	1.2495	1.2356	1.2506
21.2	1.3526	1.3502	1.3706	1.3981	1.3487	1.3433	1.358	1.3768	1.2062	1.1699	1.2437	1.2001	1.1984	1.2336	1.2263	1.2625
21.6	1.3525	1.3473	1.3707	1.4011	1.3603	1.3331	1.3537	1.3758	1.2253	1.1536	1.2398	1.2042	1.2145	1.2571	1.2264	1.2697
22	1.3614	1.3538	1.3611	1.407	1.3594	1.3374	1.364	1.3775	1.2194	1.158	1.2433	1.2039	1.2046	1.2361	1.233	1.2661
22.4	1.3512	1.3435	1.3703	1.4107	1.3592	1.3363	1.3704	1.3798	1.2192	1.1556	1.2392	1.2141	1.2064	1.2557	1.2372	1.2727
22.8	1.3616	1.3444	1.3717	1.4027	1.3495	1.3455	1.3633	1.3873	1.2148	1.1592	1.2347	1.2118	1.2228	1.2596	1.2293	1.2645
23.2	1.3613	1.3487	1.3747	1.4064	1.3616	1.3508	1.371	1.3759	1.2322	1.1612	1.255	1.2209	1.2199	1.2616	1.2658	1.2722
23.6	1.3747	1.3493	1.3761	1.3968	1.3588	1.3481	1.3669	1.3816	1.2318	1.184	1.2465	1.2133	1.2312	1.2485	1.2551	1.27
24	1.3688	1.3465	1.3854	1.4111	1.367	1.3441	1.3631	1.3846	1.2208	1.159	1.2499	1.2287	1.2509	1.2415	1.2347	1.2817
24.4	1.3668	1.3538	1.3757	1.4118	1.3606	1.3501	1.3668	1.3821	1.2211	1.2112	1.2529	1.223	1.2575	1.2499	1.2333	1.262
24.8	1.367	1.3488	1.3857	1.4093	1.3702	1.3502	1.3749	1.3843	1.2149	1.214	1.2528	1.2148	1.2619	1.2587	1.2424	1.2714
25.2	1.3734	1.3537	1.3813	1.4068	1.3647	1.3514	1.3555	1.3923	1.2349	1.2169	1.2486	1.2305	1.2532	1.2474	1.2603	1.2532
25.6	1.373	1.3521	1.3908	1.4029	1.3629	1.3465	1.3711	1.3851	1.2223	1.2182	1.238	1.2391	1.2604	1.2656	1.2386	1.2643
26	1.3655	1.3539	1.3795	1.414	1.3671	1.3492	1.3705	1.3903	1.2451	1.2188	1.2486	1.2242	1.245	1.2468	1.253	1.2842
26.4	1.3666	1.3555	1.3847	1.3948	1.3588	1.352	1.3849	1.3871	1.2178	1.2165	1.2649	1.2132	1.2577	1.2649	1.2428	1.2606
26.8	1.3781	1.3572	1.3791	1.4	1.3658	1.3542	1.3693	1.3779	1.2311	1.22	1.2398	1.2404	1.255	1.242	1.2479	1.2631
27.2	1.3712	1.3635	1.379	1.4121	1.3712	1.3444	1.3689	1.3868	1.2454	1.2342	1.2467	1.225	1.2497	1.2496	1.2402	1.2723
27.6	1.3743	1.3567	1.3788	1.4161	1.3663	1.3615	1.3725	1.3917	1.2166	1.2217	1.2491	1.2452	1.2639	1.251	1.2499	1.2691
28	1.3647	1.3688	1.3831	1.4176	1.363	1.3588	1.3707	1.3927	1.2241	1.225	1.2548	1.2309	1.2431	1.2578	1.2437	1.2629
28.4	1.3746	1.3615	1.3849	1.4056	1.3673	1.349	1.3715	1.3839	1.2136	1.2186	1.2555	1.2325	1.254	1.2294	1.2439	1.2579
28.8	1.3737	1.3541	1.3875	1.4089	1.3639	1.3456	1.3733	1.3842	1.2176	1.2184	1.2542	1.2403	1.2613	1.2604	1.2309	1.2754
29.2	1.3609	1.3702	1.3861	1.4238	1.3604	1.3612	1.3707	1.3879	1.211	1.2117	1.2759	1.2273	1.256	1.2531	1.2367	1.2496
29.6	1.3592	1.3608	1.396	1.4206	1.3632	1.3448	1.3679	1.3959	1.2333	1.2179	1.2551	1.2632	1.2675	1.2602	1.2564	1.2677
30	1.3657	1.3573	1.388	1.4169	1.3694	1.3593	1.3699	1.3879	1.2107	1.218	1.2314	1.2596	1.2641	1.2544	1.2535	1.2648
30.4	1.3594	1.3566	1.3737	1.3995	1.3563	1.3445	1.3595	1.3788	1.2239	1.204	1.2391	1.2426	1.2433	1.2461	1.2272	1.2544
30.8	1.356	1.3341	1.3647	1.3876	1.3505	1.3431	1.352	1.3719	1.2211	1.2068	1.2258	1.259	1.2405	1.242	1.2323	1.2476
31.2	1.3449	1.3298	1.3524	1.3628	1.3457	1.324	1.3437	1.3571	1.2105	1.1871	1.2274	1.2394	1.2294	1.227	1.2069	1.2459
31.6	1.3253	1.3202	1.3399	1.3644	1.3346	1.313	1.3317	1.3426	1.19	1.193	1.1949	1.2294	1.2277	1.2151	1.1969	1.2219
32	1.316	1.3001	1.331	1.3499	1.3147	1.2969	1.3222	1.3274	1.1796	1.1772	1.1934	1.2084	1.2091	1.2192	1.1897	1.2085
32.4	1.3056	1.2861	1.3138	1.3406	1.3077	1.2877	1.3034	1.3154	1.1769	1.1575	1.1857	1.1937	1.2012	1.1999	1.1845	1.2091
32.8	1.2975	1.281	1.3035	1.3162	1.3051	1.2722	1.2995	1.3121	1.1705	1.1532	1.1635	1.1762	1.199	1.1812	1.1648	1.182
33.2	1.2958	1.2709	1.2966	1.3149	1.2833	1.268	1.2862	1.292	1.1616	1.1315	1.1665	1.1801	1.1933	1.1818	1.1706	1.1948
33.6	1.2766	1.263	1.2915	1.3085	1.2903	1.2596	1.2761	1.2839	1.1437	1.1409	1.1677	1.1682	1.1778	1.182	1.1581	1.1828
34	1.2689	1.2472	1.2817	1.2917	1.2794	1.26	1.2686	1.2772	1.1441	1.1301	1.1534	1.1592	1.1616	1.1588	1.1405	1.1838
34.4	1.262	1.2508	1.2726	1.2743	1.2631	1.2535	1.2551	1.2755	1.1422	1.1322	1.1503	1.1636	1.1577	1.1653	1.1491	1.1788
34.8	1.2583	1.2397	1.2576	1.2756	1.249	1.2421	1.2526	1.2595	1.1274	1.1282	1.1478	1.1615	1.1552	1.1626	1.1327	1.1594
35.2	1.2515	1.2453	1.2541	1.2682	1.2522	1.224	1.2483	1.2513	1.1315	1.1116	1.1363	1.155	1.1484	1.1473	1.1336	1.1452
35.6	1.2439	1.2368	1.2494	1.266	1.2465	1.2289	1.2403	1.2457	1.1295	1.1096	1.1441	1.154	1.1338	1.1374	1.1205	1.1489
36	1.245	1.2211	1.2486	1.2628	1.2485	1.2233	1.2348	1.2469	1.1239	1.1127	1.1295	1.1365	1.129	1.128	1.1114	1.1349
36.4	1.2445	1.2262	1.2521	1.2598	1.2317	1.2193	1.2309	1.238	1.1116	1.1094	1.1322	1.1378	1.1464	1.1513	1.1115	1.1303
36.8	1.2361	1.2236	1.2487	1.2515	1.2287	1.2181	1.2237	1.2337	1.1261	1.1048	1.1138	1.1333	1.1292	1.1251	1.123	1.1103
37.2	1.2336	1.2143	1.2361	1.2472	1.2279	1.2119	1.2209	1.2247	1.0968	1.0947	1.1331	1.1298	1.1245	1.1337	1.1058	1.1218
37.6	1.2208	1.2136	1.2264	1.2426	1.224	1.2107	1.2189	1.2171	1.1036	1.1028	1.1083	1.1285	1.1381	1.1215	1.1089	1.121
38	1.2277	1.2095	1.2313	1.2348	1.2165	1.2023	1.214	1.2106	1.1151	1.092	1.1157	1.1092	1.1192	1.1252	1.0998	1.1167
38.4	1.2224	1.199	1.2134	1.2292	1.21	1.1971	1.206	1.2148	1.106	1.0919	1.1027	1.1198	1.1079	1.1033	1.1043	1.1142
38.8	1.2171	1.2015	1.215	1.2312	1.2144	1.1993	1.2027	1.2055	1.0948	1.0884	1.0934	1.1124	1.1094	1.108	1.0852	1.1154
39.2	1.2153	1.2042	1.2221	1.2192	1.2159	1.1945	1.1987	1.2027	1.0916	1.0765	1.1024	1.11	1.1235	1.1134	1.0828	1.1061
39.6	1.2023	1.1983	1.2139	1.2204	1.2103	1.1911	1.2008	1.2034	1.0836	1.0855	1.1023	1.1108	1.1084	1.117	1.091	1.101
40	1.2075	1.1833	1.2138	1.2233	1.1979	1.19	1.195	1.1962	1.0859	1.0802	1.0982	1.1002	1.0987	1.1064	1.0807	1.0844
40.4	1.2065	1.1873	1.2035	1.216	1.1959	1.1781	1.194	1.1938	1.0827	1.088	1.0946	1.0984	1.0989	1.1013	1.0759	1.0961
40.8	1.2006	1.1857	1.2056	1.2035	1.1953	1.1842	1.1925	1.1874	1.0855	1.0662	1.089	1.1031	1.0922	1.1057	1.0893	1.1007
41.2	1.1941	1.1852	1.2007	1.2097	1.1813	1.1823	1.1851	1.1871	1.0858	1.0688	1.1048	1.1024	1.107	1.1173	1.0832	1.1052
41.6	1.1979	1.1868	1.1947	1.1999	1.1943	1.1739	1.1747	1.182	1.0768	1.0775	1.0878	1.0875	1.088	1.0922	1.0738	1.091
42	1.1907	1.1757	1.2006	1.2026	1.184	1.181	1.1813	1.1838	1.081	1.0687	1.0985	1.1048	1.0975	1.1028	1.0707	1.0957
42.4	1.1936	1.1792	1.1954	1.1988	1.1802	1.1715	1.1796	1.1863	1.0808	1.0701	1.0897	1.0871	1.0831	1.0984	1.0595	1.0835
42.8	1.1943	1.1785	1.1918	1.1929	1.1815	1.1706	1.1766	1.1816	1.0847	1.0694	1.0787	1.0878	1.0883	1.0853	1.0627	1.1026
43.2	1.1867	1.1733	1.1976	1.1909	1.1696	1.1698	1.1779	1.1795	1.0802	1.058	1.0908	1.0785	1.0883	1.0901	1.0636	1.0767
43.6	1.1824	1.1682	1.1815	1.1954	1.1756	1.167	1.1731	1.1766	1.0714	1.0603	1.0826	1.0712	1.0897	1.0888	1.0519	1.0818
44	1.1754	1.1685	1.1929	1.1942	1.1776	1.1625	1.1696	1.173	1.0762	1.0438	1.0791	1.0857	1.0815	1.0883	1.0648	1.0716
44.4	1.1819	1.1665	1.184	1.1923	1.162	1.1615	1.1639	1.1654	1.069	1.0681	1.088	1.0677	1.0689	1.0865	1.0711	1.0686
44.8	1.182	1.1651	1.1807	1.1843	1.1777	1.1652	1.1687	1.1692	1.0701	1.0622	1.0725	1.0745	1.0782	1.0891	1.061	1.0879
45.2	1.1691	1.1632	1.1792	1.1849	1.1649	1.1614	1.168	1.1589	1.0579	1.063	1.0724	1.0853	1.0847	1.0773	1.0655	1.0689
45.6	1.1715	1.1633	1.1854	1.1796	1.1627	1.1629	1.1534	1.1686	1.0579	1.0578	1.0835	1.0687	1.088	1.069	1.0605	1.0716
46	1.1748	1.1582	1.1781	1.1879	1.1639	1.1564	1.1559	1.1561	1.068	1.052	1.0878	1.08	1.0754	1.0687	1.0445	1.0679
46.4	1.1689	1.1533	1.1812	1.195	1.1713	1.1534	1.1621	1.1471	1.0737	1.0566	1.0674	1.0814	1.0588	1.0807	1.055	1.0731
46.8	1.1738	1.152	1.1688	1.1756	1.165	1.1456	1.1541	1.1639	1.0632	1.0324	1.0659	1.0842	1.0798	1.0922	1.0555	1.0558
47.2	1.1691	1.1597	1.1733	1.1816	1.1513	1.1599	1.155	1.1565	1.051	1.0503	1.0679	1.0749	1.0672	1.079	1.0453	1.0657
47.6	1.1706	1.1541	1.1658	1.1753	1.1564	1.1514	1.1494	1.1528	1.0612	1.049	1.0635	1.0731	1.0758	1.077	1.0533	1.0636
48	1.1681	1.1567	1.1713	1.1684	1.166	1.1544	1.1525	1.1472	1.0588	1.0392	1.0674	1.0603	1.0686	1.0882	1.0558	1.0668
48.4	1.1606	1.1601	1.1766	1.1779	1.1564	1.1425	1.1493	1.1536	1.0518	1.0514	1.067	1.0729	1.0675	1.0733	1.0458	1.0621
48.8	1.1651	1.1547	1.1687	1.1713	1.1494	1.1477	1.1519	1.151	1.0625	1.0409	1.0625	1.0751	1.0682	1.0592	1.055	1.0519
49.2	1.1615	1.1505	1.1588	1.1745	1.1457	1.1432	1.1455	1.145	1.0638	1.0354	1.0632	1.0565	1.064	1.0736	1.0406	1.081
49.6	1.1622	1.1527	1.1671	1.1662	1.1507	1.1443	1.1469	1.1464	1.0435	1.0408	1.063	1.0622	1.0545	1.0678	1.0465	1.0545
50	1.164	1.1477	1.1603	1.1614	1.1456	1.1419	1.1515	1.1413	1.0609	1.044	1.0742	1.0703	1.0649	1.0714	1.0472	1.0586
50.4	1.1553	1.1553	1.1609	1.1642	1.146	1.1457	1.1379	1.151	1.0458	1.0434	1.0724	1.0557	1.0647	1.0734	1.0469	1.0635
50.8	1.1504	1.1512	1.1597	1.1652	1.1512	1.1439	1.1436	1.1487	1.0424	1.0333	1.0545	1.0691	1.0607	1.0677	1.0368	1.0554
51.2	1.1551	1.1527	1.1572	1.159	1.1464	1.1361	1.1469	1.1425	1.051	1.0524	1.0675	1.0673	1.0501	1.0614	1.0434	1.0422
51.6	1.1557	1.1504	1.1608	1.1567	1.1441	1.128	1.1411	1.1407	1.0427	1.0424	1.0612	1.064	1.0529	1.0729	1.0374	1.0541
52	1.1561	1.1415	1.1581	1.1639	1.1429	1.1388	1.1528	1.1393	1.0519	1.0459	1.071	1.0618	1.0607	1.0741	1.0532	1.0551
52.4	1.1615	1.1419	1.1586	1.158	1.1458	1.1349	1.1344	1.1397	1.0544	1.034	1.0603	1.0557	1.0586	1.0659	1.0392	1.0564
52.8	1.1502	1.1511	1.1596	1.1618	1.1383	1.1289	1.1389	1.1345	1.0584	1.0359	1.059	1.0627	1.0673	1.0644	1.0429	1.063
53.2	1.1567	1.1409	1.1576	1.1609	1.1469	1.1347	1.1343	1.1343	1.0496	1.0396	1.0639	1.0573	1.0554	1.057	1.0379	1.0505
53.6	1.1503	1.1383	1.1532	1.1537	1.1397	1.1331	1.1431	1.1328	1.0461	1.0365	1.0564	1.0679	1.0446	1.0636	1.038	1.0521
54	1.1578	1.1404	1.1504	1.1626	1.1402	1.1335	1.1275	1.1395	1.0498	1.0338	1.0543	1.0492	1.052	1.08	1.0432	1.0512
54.4	1.1503	1.1411	1.145	1.1541	1.1443	1.1392	1.1339	1.135	1.0446	1.04	1.056	1.0641	1.0543	1.0626	1.0412	1.0511
54.8	1.1515	1.1367	1.1467	1.1529	1.1421	1.137	1.123	1.1253	1.0376	1.0365	1.0603	1.0474	1.0485	1.0557	1.0491	1.0385
55.2	1.1427	1.1344	1.148	1.1521	1.134	1.1244	1.1279	1.1342	1.0444	1.0521	1.0529	1.0412	1.0496	1.0476	1.0208	1.0457
55.6	1.1505	1.1401	1.1429	1.1567	1.1428	1.1329	1.1245	1.1342	1.0356	1.0367	1.0467	1.0541	1.0491	1.053	1.03	1.0514
56	1.1465	1.1343	1.1442	1.1488	1.1354	1.1262	1.1399	1.1242	1.0443	1.0319	1.0607	1.0527	1.069	1.0617	1.0416	1.0414
56.4	1.1444	1.1322	1.1447	1.1574	1.1445	1.1293	1.1299	1.1286	1.0492	1.0358	1.049	1.041	1.0577	1.0589	1.0272	1.0448
56.8	1.1526	1.1348	1.1404	1.1494	1.1264	1.1269	1.1313	1.1229	1.0441	1.0226	1.043	1.046	1.0599	1.0546	1.0194	1.0442
57.2	1.147	1.135	1.1405	1.1425	1.1271	1.1277	1.1289	1.1341	1.0361	1.0379	1.0581	1.0519	1.0454	1.0496	1.0426	1.0419
57.6	1.1454	1.136	1.1416	1.1523	1.1273	1.1278	1.1261	1.1183	1.0349	1.0252	1.0556	1.0473	1.0412	1.0645	1.0376	1.0448
58	1.1391	1.1363	1.1404	1.1556	1.1267	1.1248	1.1246	1.124	1.0394	1.0404	1.0404	1.0487	1.0528	1.048	1.0322	1.0421
58.4	1.1386	1.1436	1.1481	1.1429	1.1274	1.1257	1.1275	1.123	1.0439	1.0318	1.0598	1.0481	1.0416	1.0567	1.0267	1.043
58.8	1.1423	1.134	1.141	1.1449	1.132	1.1221	1.1248	1.1172	1.035	1.0287	1.0537	1.055	1.0497	1.0605	1.0261	1.0403
59.2	1.1423	1.1271	1.1403	1.1472	1.1319	1.1255	1.1239	1.1237	1.0419	1.0322	1.0544	1.0534	1.0452	1.0599	1.0197	1.0326
59.6	1.1438	1.12	1.147	1.1461	1.1363	1.1267	1.1189	1.1216	1.0488	1.0246	1.0491	1.0478	1.0512	1.0562	1.0193	1.038
60	1.1417	1.1341	1.1406	1.1473	1.1267	1.1211	1.1179	1.1115	1.0366	1.0269	1.0397	1.0473	1.0414	1.0521	1.0265	1.0282
60.4	1.1334	1.1296	1.1456	1.1427	1.123	1.1217	1.12	1.1278	1.0338	1.0177	1.0515	1.0566	1.0473	1.0444	1.0275	1.0341
60.8	1.1395	1.1213	1.1368	1.1514	1.1202	1.1168	1.1248	1.1179	1.0401	1.023	1.0511	1.0464	1.0523	1.0498	1.0225	1.0415
61.2	1.1426	1.1314	1.1426	1.1467	1.125	1.116	1.1219	1.1199	1.038	1.027	1.0481	1.0406	1.0495	1.0403	1.0242	1.0421
61.6	1.1447	1.1247	1.1433	1.1475	1.1263	1.1192	1.1262	1.1209	1.019	1.0254	1.048	1.0422	1.0475	1.0566	1.0161	1.0414
62	1.1313	1.1365	1.1415	1.1525	1.1151	1.1189	1.12	1.1238	1.0333	1.0356	1.048	1.0391	1.0548	1.0588	1.0188	1.0382
62.4	1.1423	1.1367	1.1432	1.1378	1.1192	1.1206	1.1208	1.114	1.0378	1.0257	1.0436	1.0474	1.0496	1.0524	1.0315	1.0353
62.8	1.141	1.1277	1.1273	1.1406	1.1216	1.1169	1.1189	1.1136	1.0316	1.0386	1.0498	1.0505	1.0455	1.0572	1.0162	1.026
63.2	1.1366	1.1193	1.1366	1.133	1.113	1.1184	1.1075	1.1131	1.0331	1.0283	1.0516	1.0547	1.0429	1.0488	1.0137	1.0381
63.6	1.1297	1.1338	1.1421	1.1311	1.1238	1.1121	1.1149	1.1208	1.026	1.0214	1.0313	1.0385	1.0368	1.0577	1.0241	1.0358
64	1.137	1.1188	1.1294	1.14	1.1241	1.1187	1.1108	1.1104	1.0424	1.0266	1.0489	1.0321	1.0409	1.0653	1.0245	1.0378
64.4	1.1274	1.1273	1.1395	1.1383	1.1229	1.1111	1.1138	1.1208	1.0271	1.0228	1.0529	1.0453	1.0391	1.0635	1.0291	1.0348
64.8	1.132	1.1375	1.1321	1.1414	1.1168	1.1109	1.115	1.1206	1.0292	1.0303	1.0448	1.036	1.0414	1.0496	1.0285	1.0319
65.2	1.1396	1.1336	1.1332	1.1363	1.1202	1.1141	1.1146	1.1105	1.0344	1.0254	1.0411	1.0442	1.04	1.0472	1.0264	1.0334
65.6	1.1322	1.1251	1.1409	1.1389	1.1151	1.1172	1.1127	1.1161	1.0274	1.0332	1.0241	1.0319	1.0418	1.0566	1.0101	1.0366
66	1.1394	1.1401	1.132	1.1361	1.1188	1.1165	1.1132	1.1153	1.0359	1.0211	1.0427	1.0458	1.0453	1.0409	1.0305	1.0332
66.4	1.1302	1.1315	1.1363	1.1409	1.1142	1.1113	1.1108	1.1091	1.0309	1.0176	1.0439	1.0463	1.0399	1.0513	1.0184	1.0291
66.8	1.1315	1.1311	1.1329	1.139	1.1191	1.1152	1.1166	1.1136	1.0398	1.0346	1.0393	1.0321	1.0396	1.0569	1.0242	1.044
67.2	1.1302	1.1202	1.135	1.135	1.1085	1.1171	1.1156	1.1177	1.0331	1.0273	1.0419	1.0403	1.0397	1.0667	1.0307	1.0388
67.6	1.132	1.1215	1.1309	1.1283	1.1183	1.1179	1.1213	1.1167	1.0347	1.0257	1.0361	1.0325	1.0469	1.0416	1.018	1.0307
68	1.1305	1.1246	1.1267	1.1262	1.1164	1.1186	1.1072	1.1136	1.0505	1.0261	1.0429	1.0248	1.0459	1.0504	1.0255	1.0239
68.4	1.1246	1.1185	1.1315	1.1376	1.1162	1.1147	1.1167	1.1078	1.0307	1.0259	1.0359	1.0265	1.0361	1.059	1.0275	1.0405
68.8	1.134	1.1296	1.1272	1.1343	1.1115	1.123	1.1107	1.1095	1.0253	1.0285	1.0424	1.0363	1.0304	1.0497	1.0149	1.0389
69.2	1.13	1.1316	1.126	1.1336	1.1148	1.1123	1.1053	1.1175	1.0293	1.0235	1.039	1.0424	1.0316	1.0546	1.024	1.0419
69.6	1.1328	1.125	1.1336	1.1289	1.1143	1.1116	1.1188	1.11	1.0334	1.013	1.0272	1.0439	1.0302	1.0333	1.0183	1.0417
70	1.1303	1.1296	1.1356	1.1277	1.1124	1.1147	1.1195	1.113	1.0352	1.0211	1.0334	1.0336	1.038	1.0418	1.0225	1.0401
70.4	1.1232	1.1223	1.1251	1.1345	1.1084	1.1137	1.102	1.1063	1.0353	1.0167	1.038	1.0323	1.0548	1.0514	1.0349	1.0286
70.8	1.1265	1.1247	1.1248	1.126	1.1069	1.1116	1.1146	1.1133	1.031	1.0071	1.0438	1.0437	1.0405	1.046	1.0106	1.0375
71.2	1.1257	1.1176	1.1222	1.1291	1.1147	1.1046	1.1119	1.1158	1.0305	0.9821	1.0311	1.0355	1.0408	1.0589	1.0222	1.037
71.6	1.1299	1.1211	1.1204	1.13	1.1121	1.1132	1.1085	1.1075	1.0264	0.9747	1.0302	1.0265	1.0284	1.0527	1.0097	1.0477
72	1.1259	1.1174	1.1235	1.1268	1.1055	1.1107	1.1115	1.104	1.03	0.9784	1.0341	1.0288	1.0483	1.0473	1.0178	1.041
72.4	1.1238	1.1207	1.1206	1.1258	1.1087	1.1118	1.1114	1.0993	1.0162	1.0064	1.0311	1.0379	1.036	1.0405	1.0121	1.0455
72.8	1.1229	1.1205	1.129	1.132	1.1069	1.1109	1.1086	1.1071	1.0237	1.0122	1.0349	1.0484	1.0357	1.0489	1.0146	1.0375
73.2	1.1262	1.1266	1.1303	1.1331	1.1176	1.1053	1.1099	1.1068	1.0258	1.0123	1.0376	1.0236	1.0238	1.0394	1.005	1.0232
73.6	1.1193	1.1189	1.1238	1.127	1.1109	1.1204	1.1038	1.1034	1.0188	1.0295	1.0268	1.0423	1.0163	1.0412	1.0109	1.0261
74	1.127	1.1247	1.1321	1.1213	1.1081	1.1067	1.1078	1.1023	1.0285	1.0263	1.0367	1.0365	1.0335	1.0491	1.0074	1.0225
74.4	1.1326	1.1208	1.1257	1.1281	1.1116	1.1151	1.1008	1.1114	1.0349	1.0125	1.0282	1.0328	1.0232	1.037	1.0252	1.0319
74.8	1.119	1.1244	1.1175	1.1307	1.1114	1.111	1.1073	1.1028	1.0176	1.0321	1.0283	1.04	1.0268	1.0352	1.0173	1.0289
75.2	1.1295	1.1274	1.1176	1.1318	1.1125	1.1073	1.106	1.1041	1.0229	1.0149	1.0332	1.0227	1.0304	1.041	1.0294	1.0366
75.6	1.123	1.1292	1.1269	1.1206	1.1025	1.1105	1.1107	1.0998	1.0318	1.019	1.0413	1.0313	1.0228	1.0305	1.0191	1.0315
76	1.1272	1.1232	1.1119	1.1304	1.1128	1.1095	1.1079	1.1037	1.0364	1.0226	1.0392	1.0408	1.0311	1.0467	1.0089	1.0302
76.4	1.1261	1.1165	1.1256	1.1292	1.0923	1.1131	1.1081	1.1028	1.0317	1.0127	1.0335	1.0279	1.028	1.0282	1.0175	1.0355
76.8	1.1287	1.1165	1.1233	1.1264	1.1076	1.1123	1.1047	1.0992	1.026	1.0191	1.0327	1.0337	1.027	1.0483	1.0119	1.0389
77.2	1.1224	1.1203	1.1196	1.1261	1.1056	1.1096	1.1039	1.1045	1.0316	1.0259	1.0358	1.0254	1.0338	1.0568	1.0154	1.0314
77.6	1.1252	1.1166	1.1208	1.1297	1.1094	1.1099	1.1006	1.1028	1.0223	1.0241	1.0307	1.0387	1.0395	1.0441	1.002	1.0469
78	1.1251	1.1174	1.1192	1.1209	1.1072	1.1013	1.1068	1.0999	1.0116	1.012	1.0347	1.0401	1.0348	1.0508	1.0224	1.0347
78.4	1.1209	1.1115	1.1192	1.1289	1.1071	1.1049	1.1037	1.0989	1.0234	1.0203	1.0261	1.035	1.0258	1.0376	1.0068	1.0257
78.8	1.1216	1.1173	1.1204	1.1303	1.1085	1.1062	1.1105	1.0986	1.0137	1.0165	1.0454	1.0141	1.0398	1.0441	1.0108	1.0293
79.2	1.1214	1.1128	1.1219	1.1262	1.1031	1.0946	1.1017	1.1048	1.0202	1.0239	1.0451	1.0297	1.0296	1.0589	1.0172	1.0322
79.6	1.1181	1.1191	1.1191	1.1267	1.1018	1.1005	1.0992	1.1035	1.0246	1.0399	1.0288	1.0375	1.0271	1.0387	1.0118	1.0328
80	1.1243	1.1098	1.1108	1.1261	1.1052	1.1078	1.1035	1.086	1.0286	1.0191	1.0309	1.0253	1.0316	1.0312	1.0173	1.0231
80.4	1.125	1.1134	1.1195	1.1215	1.114	1.1034	1.0989	1.0901	1.0277	1.0113	1.0335	1.0282	1.0326	1.0438	1.0117	1.0347
80.8	1.1238	1.1238	1.1192	1.125	1.1032	1.106	1.0957	1.0958	1.0157	1.0254	1.0366	1.0297	1.0225	1.0385	1.0001	1.0142
81.2	1.1258	1.1195	1.126	1.1256	1.1089	1.1027	1.1007	1.0999	1.0202	1.0234	1.0211	1.0224	1.032	1.0541	1.019	1.0343
81.6	1.1286	1.1151	1.1141	1.1286	1.1064	1.1123	1.1014	1.0956	1.0226	1.0151	1.0315	1.0276	1.0306	1.0276	1.0156	1.0427
82	1.1254	1.1182	1.1244	1.1266	1.1076	1.1132	1.1042	1.1006	1.028	1.0247	1.0305	1.0366	1.0333	1.0276	1.0098	1.034
82.4	1.13	1.117	1.1183	1.127	1.1063	1.1052	1.0977	1.1034	1.0323	1.0226	1.0294	1.0354	1.0174	1.0407	1.0259	1.0399
82.8	1.1239	1.1112	1.1193	1.1238	1.1086	1.1038	1.0993	1.0973	1.0233	1.0129	1.035	1.0232	1.0199	1.0436	1.0219	1.0322
83.2	1.1231	1.1272	1.1178	1.1291	1.1073	1.109	1.1106	1.0944	1.0254	1.0188	1.0286	1.0274	1.0337	1.0366	1.0148	1.0391
83.6	1.1164	1.1181	1.1108	1.1228	1.1036	1.1091	1.0991	1.1079	1.0317	1.0141	1.0311	1.0296	1.0345	1.0457	1.0058	1.0383
84	1.1278	1.1172	1.1173	1.119	1.1079	1.1033	1.0999	1.0904	1.0239	1.0131	1.0262	1.026	1.0293	1.0347	1.0159	1.0291
84.4	1.1184	1.119	1.1149	1.1259	1.1022	1.1073	1.0979	1.101	1.0338	1.0094	1.0229	1.0392	1.0426	1.0533	1.0102	1.0237
84.8	1.1219	1.109	1.1126	1.1269	1.1048	1.1053	1.1046	1.0949	1.0266	1.0185	1.0216	1.0377	1.0251	1.0469	1.0126	1.0303
85.2	1.1228	1.1126	1.1206	1.1215	1.1094	1.1028	1.1062	1.1019	1.0072	1.0201	1.0455	1.0264	1.0276	1.0419	1.0057	1.0278
85.6	1.1224	1.1183	1.1119	1.109	1.106	1.105	1.0983	1.0885	1.0292	1.0123	1.0302	1.0187	1.0304	1.0428	1.0107	1.0285
86	1.1228	1.1198	1.1159	1.1197	1.1078	1.1027	1.1011	1.096	1.0223	1.0103	1.0177	1.0325	1.0292	1.0412	1.0084	1.0317
86.4	1.1245	1.1166	1.1123	1.1215	1.1113	1.097	1.0977	1.0899	1.0285	1.0216	1.0223	0.976	1.0285	1.0369	1.0025	1.0289
86.8	1.1126	1.1192	1.1226	1.1139	1.1015	1.1072	1.0958	1.0934	1.0214	1.0097	1.0258	0.9915	1.0212	1.0393	1.0181	1.0321
87.2	1.1253	1.1163	1.118	1.1267	1.1029	1.1055	1.0994	1.0951	1.0095	1.0087	1.0357	0.9903	1.0127	1.0425	1.0083	1.0238
87.6	1.1195	1.1127	1.1177	1.1108	1.1004	1.097	1.1058	1.0973	1.0245	1.0205	1.0292	0.9932	1.0407	1.0259	1.0163	1.0172
88	1.1179	1.1149	1.1172	1.1105	1.1075	1.1022	1.1002	1.1011	1.0215	1.0263	1.0376	0.989	1.0344	1.0375	1.0172	1.0228
88.4	1.1153	1.1157	1.1111	1.1215	1.0995	1.1024	1.1008	1.0963	1.0205	1.0128	1.0238	0.99	1.0315	1.0468	1.0064	1.0344
88.8	1.1158	1.1113	1.1147	1.1287	1.106	1.097	1.0957	1.0979	1.0271	1.0225	1.0302	0.9833	1.0333	1.0445	1.0128	1.0334
89.2	1.1112	1.1093	1.1147	1.1273	1.1012	1.095	1.0952	1.0949	1.0139	1.0168	1.0267	0.9761	1.0207	1.0399	1.0109	1.0198
89.6	1.1197	1.1151	1.1186	1.1179	1.0973	1.1085	1.1028	1.0929	1.0277	1.0087	1.0201	0.9927	1.0181	1.0358	1.014	1.0334
90	1.1212	1.1134	1.1088	1.1168	1.0918	1.1038	1.0988	1.0964	1.0185	1.0158	1.034	0.9938	1.0292	1.0386	0.9944	1.0151
90.4	1.125	1.1202	1.1232	1.1184	1.1031	1.0974	1.0985	1.0933	1.0097	1.0189	1.0329	0.9975	1.0196	1.0292	1.0193	1.0192
90.8	1.1223	1.1176	1.118	1.1077	1.0958	1.0987	1.0945	1.1003	1.0251	1.0143	1.0333	0.9908	1.0153	1.0471	1.0197	1.0224
91.2	1.1148	1.1061	1.1175	1.1163	1.0958	1.1024	1.0959	1.0987	1.0213	1.0238	1.0271	0.985	1.0206	1.033	1.0207	1.0241
91.6	1.1192	1.1145	1.122	1.115	1.0948	1.0995	1.0956	1.1021	1.024	1.0242	1.0425	0.9851	1.022	1.0292	1.0209	1.0198
92	1.1147	1.1093	1.1199	1.1231	1.1029	1.1028	1.1011	1.0924	1.0148	1.0115	1.037	0.9947	1.0232	1.0472	1.0026	1.0308
92.4	1.1164	1.1185	1.1175	1.1214	1.1062	1.1014	1.1005	1.0904	1.0207	1.0125	1.0239	0.9828	1.0098	1.0354	1.0015	1.0205
92.8	1.1151	1.1128	1.1097	1.113	1.0966	1.1034	1.1012	1.0988	1.0144	0.9937	1.032	0.9903	1.0419	1.0298	1.0107	1.0285
93.2	1.1127	1.109	1.1163	1.1163	1.0972	1.1056	1.0989	1.0849	1.0228	1.016	1.0322	0.9822	1.0343	1.036	1.0064	1.0233
93.6	1.1275	1.121	1.1212	1.1211	1.104	1.0967	1.091	1.0994	1.0325	1.004	1.0374	0.9812	1.0169	1.0341	1.0228	1.0194
94	1.1167	1.1079	1.114	1.1108	1.0913	1.0955	1.0999	1.0887	1.0136	1.0261	1.0198	0.9852	1.0298	1.0426	1.0009	1.0216
94.4	1.1162	1.1061	1.1216	1.1137	1.0991	1.0985	1.0997	1.0896	1.0157	0.9997	1.0246	0.9963	1.0362	1.0381	1.0085	1.0336
94.8	1.1205	1.1178	1.114	1.1191	1.09	1.0951	1.1	1.0959	1.0292	1.0107	1.0251	0.9842	1.0289	1.0318	0.9979	1.0249
95.2	1.1181	1.1151	1.1207	1.1219	1.0978	1.0966	1.0871	1.0829	1.0186	1.0007	1.045	0.9851	1.0267	1.0294	1.0063	1.0153
95.6	1.113	1.1162	1.11	1.1215	1.0963	1.0931	1.0972	1.0946	1.0344	1.0092	1.0215	0.9888	1.023	1.0481	1.0082	1.0284
96	1.1155	1.1147	1.1216	1.1207	1.099	1.0931	1.0982	1.0923	1.0333	1.0263	1.03	0.9964	1.0265	1.0405	1.0162	1.0193
96.4	1.1091	1.1143	1.114	1.1184	1.0995	1.0943	1.0997	1.0982	1.0176	1.0057	1.0338	0.9891	1.0207	1.039	1.0087	1.0284
96.8	1.1123	1.1084	1.1116	1.1211	1.0991	1.0949	1.0949	1.0987	1.0116	1.0139	1.0408	0.9864	1.0207	1.024	1.0115	1.0407
97.2	1.127	1.1201	1.1079	1.1244	1.0959	1.1001	1.1007	1.0963	1.0359	1.0168	1.0328	1.0008	1.0267	1.0375	1.0084	1.0175
97.6	1.1088	1.1166	1.1145	1.119	1.0956	1.1009	1.0906	1.0946	1.0067	1.0114	1.0164	0.9892	1.0271	1.0292	1.0078	1.0198
98	1.1165	1.1073	1.1091	1.1299	1.1041	1.0989	1.1013	1.0992	1.0121	1.0104	1.0274	0.994	1.0215	1.0512	1.0277	1.0291
98.4	1.1147	1.1148	1.1119	1.1159	1.0962	1.0959	1.0961	1.0952	1.0168	1.0142	1.0244	0.9937	1.0167	1.0381	1.0016	1.0212
98.8	1.1126	1.1214	1.1141	1.113	1.0978	1.0945	1.0957	1.095	1.0272	1.0211	1.0201	0.9994	1.0298	1.032	1.0109	1.0215
99.2	1.11	1.1047	1.1149	1.121	1.0983	1.0989	1.0971	1.1039	1.0249	1.0192	1.026	0.9897	1.0286	1.0364	1.0073	1.0288
99.6	1.1143	1.1051	1.1096	1.1185	1.1033	1.0946	1.0911	1.1011	1.0262	1.011	1.0176	0.9919	1.0364	1.0237	1.0181	1.0178

## Sheet: D2R-Nluc
Time (s)	D2S-Nluc
0	0.3509	0.3588	0.3608	0.3601	0.3473	0.3583	0.3622	0.3628	0.3643	0.3639	0.3585	0.361	0.3633	0.3617	0.3584	0.3317	0.3373	0.3369	0.3372	0.3398	0.3416	0.3413	0.3376	0.3469	0.3471	0.3501	0.3517
0.5	0.3511	0.3611	0.3607	0.3628	0.349	0.3587	0.3615	0.3611	0.3648	0.3632	0.3592	0.3609	0.363	0.3616	0.3591	0.3321	0.3403	0.3383	0.338	0.335	0.3421	0.3435	0.3368	0.3477	0.3509	0.3466	0.3497
1	0.3488	0.3572	0.3605	0.3601	0.3503	0.3592	0.3627	0.3635	0.3645	0.3622	0.3586	0.3623	0.3632	0.3617	0.3579	0.3347	0.3396	0.3394	0.334	0.3391	0.3429	0.3394	0.3405	0.3487	0.3518	0.3505	0.3499
1.5	0.3529	0.3585	0.3629	0.3617	0.3507	0.3582	0.3627	0.3598	0.3642	0.3632	0.3582	0.3615	0.3629	0.3614	0.3591	0.3333	0.3391	0.3388	0.3352	0.337	0.3423	0.3409	0.3421	0.3459	0.351	0.3479	0.349
2	0.3504	0.3603	0.3603	0.3596	0.3528	0.3591	0.3618	0.3637	0.365	0.3633	0.3581	0.3612	0.3641	0.3613	0.3587	0.3313	0.3386	0.3404	0.3365	0.3386	0.3419	0.3401	0.3407	0.3461	0.3493	0.3498	0.3493
2.5	0.3507	0.3558	0.3641	0.3581	0.3489	0.3565	0.363	0.363	0.365	0.3626	0.3596	0.3616	0.3635	0.3614	0.3578	0.3336	0.337	0.3396	0.3343	0.3397	0.3394	0.3429	0.3388	0.349	0.3494	0.3486	0.3508
3	0.3522	0.3595	0.3618	0.3623	0.3516	0.3583	0.3641	0.3628	0.3642	0.3641	0.359	0.3612	0.3632	0.3614	0.3583	0.3328	0.3394	0.339	0.335	0.338	0.3408	0.3414	0.3397	0.3489	0.3497	0.3476	0.3481
3.5	0.3529	0.3567	0.3601	0.3589	0.3482	0.3591	0.3614	0.364	0.3644	0.3631	0.3583	0.3621	0.3631	0.3613	0.3591	0.3328	0.3375	0.3388	0.3363	0.3419	0.3404	0.3414	0.3396	0.3469	0.3488	0.3503	0.3496
4	0.35	0.3584	0.36	0.3615	0.3509	0.3592	0.3605	0.3632	0.3645	0.3631	0.3577	0.3611	0.3638	0.3616	0.3585	0.3325	0.3411	0.3396	0.3348	0.3386	0.3402	0.3404	0.3412	0.3471	0.349	0.3486	0.3515
4.5	0.3523	0.3603	0.3601	0.3583	0.3514	0.3589	0.3636	0.361	0.3647	0.3639	0.3582	0.3617	0.3635	0.3617	0.3594	0.3323	0.3413	0.3394	0.3373	0.3379	0.343	0.3435	0.3414	0.3489	0.3496	0.3501	0.3493
5	0.3541	0.3596	0.3608	0.3576	0.3488	0.3592	0.3628	0.3599	0.3642	0.3639	0.3584	0.361	0.3639	0.3618	0.3586	0.3318	0.3391	0.3397	0.3375	0.3375	0.3403	0.3426	0.3383	0.3489	0.3477	0.3503	0.3483
5.5	0.353	0.3587	0.361	0.3617	0.3482	0.3603	0.3618	0.3632	0.3642	0.3629	0.3585	0.3609	0.3638	0.3616	0.3583	0.3342	0.3365	0.3382	0.335	0.3396	0.3407	0.3417	0.3405	0.3492	0.3491	0.3513	0.3501
6	0.3524	0.3584	0.3583	0.3569	0.3502	0.3573	0.3604	0.3622	0.364	0.3637	0.358	0.3621	0.3637	0.3614	0.3596	0.3307	0.3393	0.3409	0.3366	0.3414	0.3405	0.3431	0.3389	0.3477	0.3488	0.3489	0.3484
6.5	0.3535	0.3592	0.36	0.3599	0.3478	0.3605	0.3623	0.3626	0.364	0.3626	0.3583	0.3615	0.3636	0.3617	0.3584	0.3308	0.3404	0.3365	0.3365	0.3395	0.3408	0.3406	0.341	0.3497	0.3511	0.351	0.3504
7	0.3545	0.3586	0.3618	0.36	0.3539	0.3599	0.3589	0.3634	0.3636	0.3634	0.3582	0.3611	0.3634	0.361	0.3579	0.3324	0.3358	0.3403	0.335	0.3406	0.3416	0.3378	0.3396	0.3475	0.3501	0.3496	0.3487
7.5	0.3546	0.361	0.3571	0.3584	0.3507	0.36	0.3622	0.3628	0.3643	0.3626	0.3589	0.3614	0.3634	0.3613	0.359	0.3347	0.3387	0.3392	0.3359	0.3407	0.3423	0.3421	0.3403	0.3461	0.3506	0.3484	0.3494
8	0.3544	0.36	0.3603	0.3577	0.3514	0.3577	0.3615	0.3619	0.3639	0.3633	0.3593	0.3615	0.3636	0.3612	0.3577	0.3339	0.337	0.3378	0.3353	0.3378	0.343	0.3404	0.3384	0.3448	0.3513	0.3482	0.3494
8.5	0.3527	0.3592	0.36	0.3603	0.3501	0.3581	0.3617	0.3616	0.3638	0.3636	0.3584	0.3615	0.3627	0.3617	0.3583	0.335	0.3393	0.3395	0.3364	0.3406	0.3416	0.3406	0.34	0.3466	0.3477	0.3474	0.3505
9	0.3529	0.3579	0.3596	0.3594	0.3502	0.3582	0.3624	0.3632	0.3644	0.3638	0.3587	0.3606	0.3631	0.3614	0.3583	0.3342	0.339	0.3381	0.3373	0.3399	0.345	0.3424	0.3389	0.3483	0.3518	0.3507	0.3491
9.5	0.3521	0.3587	0.3608	0.3593	0.3504	0.359	0.36	0.3641	0.3643	0.3638	0.358	0.3627	0.3636	0.3607	0.3582	0.3343	0.3363	0.3363	0.3338	0.3404	0.341	0.3426	0.3379	0.3473	0.3515	0.3496	0.3506
10	0.35	0.361	0.3617	0.3645	0.3525	0.3583	0.3641	0.3646	0.3627	0.3627	0.3578	0.3615	0.3645	0.3626	0.36	0.3334	0.3385	0.3387	0.3358	0.3391	0.3434	0.3433	0.3387	0.3486	0.3518	0.3504	0.3506
10.5	0.362	0.3735	0.3719	0.3733	0.3564	0.3671	0.3739	0.374	0.3663	0.3655	0.3616	0.3655	0.37	0.3693	0.3645	0.3354	0.3448	0.3431	0.3424	0.3433	0.3452	0.3462	0.3444	0.3524	0.3569	0.3573	0.3546
11	0.3682	0.3767	0.3797	0.3761	0.3653	0.3745	0.3768	0.3755	0.3698	0.368	0.3641	0.3709	0.3725	0.3708	0.3677	0.3416	0.3465	0.3474	0.3408	0.3481	0.3461	0.3493	0.3478	0.3583	0.3619	0.3621	0.361
11.5	0.369	0.379	0.3811	0.3798	0.3685	0.3784	0.3811	0.3815	0.3721	0.3697	0.3649	0.373	0.3736	0.373	0.3686	0.3443	0.3473	0.3457	0.3451	0.3508	0.3522	0.3513	0.3509	0.3592	0.3674	0.363	0.3629
12	0.3736	0.3788	0.3865	0.3829	0.3696	0.383	0.3825	0.3808	0.3737	0.3715	0.3667	0.3735	0.3748	0.3738	0.3701	0.3435	0.3477	0.3501	0.3458	0.3502	0.353	0.3525	0.3502	0.3629	0.3669	0.3645	0.3637
12.5	0.3752	0.3824	0.3852	0.3873	0.3736	0.3799	0.3873	0.3825	0.3738	0.3722	0.3685	0.3743	0.3753	0.3745	0.3706	0.3445	0.3496	0.3507	0.3472	0.3533	0.3557	0.3529	0.3524	0.3648	0.3674	0.3657	0.3648
13	0.3757	0.3858	0.3844	0.3855	0.3728	0.3833	0.3847	0.3849	0.3735	0.374	0.3686	0.3748	0.3753	0.3747	0.371	0.3449	0.3512	0.3508	0.3485	0.355	0.3529	0.3539	0.3537	0.3657	0.3676	0.3679	0.3665
13.5	0.3772	0.3828	0.3863	0.386	0.3721	0.3848	0.3863	0.3848	0.3745	0.3729	0.3683	0.3764	0.3748	0.3749	0.3715	0.3442	0.3502	0.351	0.3476	0.3567	0.3565	0.356	0.353	0.3672	0.3689	0.369	0.3664
14	0.3807	0.3838	0.3836	0.3896	0.3745	0.3859	0.3883	0.3872	0.3746	0.3741	0.3702	0.3749	0.3752	0.3749	0.3715	0.3454	0.351	0.353	0.3484	0.3552	0.3541	0.3557	0.353	0.3675	0.37	0.3704	0.3703
14.5	0.3803	0.3835	0.3886	0.3901	0.3768	0.3854	0.3879	0.384	0.3748	0.3737	0.3699	0.3752	0.3769	0.3757	0.3719	0.3462	0.3521	0.3523	0.3497	0.3535	0.3563	0.3571	0.3533	0.3691	0.3696	0.3702	0.3687
15	0.3777	0.3856	0.3899	0.3881	0.3755	0.3869	0.3885	0.3866	0.3763	0.3755	0.3692	0.3754	0.377	0.3762	0.3716	0.3488	0.3525	0.3514	0.3512	0.3548	0.3581	0.3561	0.3565	0.3687	0.3724	0.3692	0.3704
15.5	0.3796	0.3869	0.3902	0.3909	0.378	0.39	0.3871	0.3887	0.3757	0.3737	0.3696	0.3751	0.3768	0.3757	0.3715	0.3449	0.3504	0.3525	0.3502	0.3562	0.3575	0.3578	0.3541	0.366	0.372	0.3702	0.3696
16	0.38	0.3853	0.39	0.3863	0.3776	0.3883	0.388	0.3854	0.3766	0.375	0.3705	0.3766	0.3768	0.3762	0.3726	0.3496	0.3538	0.3546	0.3506	0.3552	0.3552	0.3553	0.3523	0.3659	0.3715	0.3691	0.3705
16.5	0.3797	0.3868	0.3881	0.388	0.378	0.3875	0.3859	0.3901	0.3766	0.3753	0.369	0.3762	0.3767	0.3752	0.3727	0.3488	0.353	0.3553	0.3485	0.3581	0.3605	0.3567	0.353	0.3693	0.3722	0.3712	0.367
17	0.3783	0.39	0.3891	0.3904	0.3778	0.3857	0.3909	0.3888	0.3763	0.3758	0.3697	0.3759	0.3774	0.3772	0.3727	0.3488	0.3532	0.3542	0.35	0.3551	0.3598	0.3587	0.3546	0.3707	0.3712	0.3719	0.3686
17.5	0.3793	0.3893	0.3901	0.3903	0.3795	0.3888	0.3884	0.3864	0.377	0.3753	0.3705	0.3766	0.3776	0.3767	0.3728	0.3505	0.3533	0.3549	0.3514	0.3559	0.3596	0.3546	0.3536	0.37	0.3722	0.3712	0.3712
18	0.3819	0.3882	0.3899	0.3911	0.3768	0.3866	0.3885	0.3885	0.3775	0.3759	0.3715	0.3759	0.3771	0.3775	0.3734	0.3474	0.354	0.3521	0.3497	0.3572	0.3604	0.3582	0.3571	0.3728	0.3723	0.3699	0.372
18.5	0.3803	0.3886	0.3916	0.3895	0.3804	0.387	0.3909	0.3902	0.3772	0.3761	0.3716	0.3761	0.3772	0.377	0.3731	0.3492	0.3562	0.3542	0.3505	0.3572	0.3586	0.3586	0.3562	0.3704	0.372	0.3709	0.3699
19	0.3797	0.3891	0.3931	0.3883	0.3797	0.3902	0.3888	0.3909	0.3777	0.376	0.3703	0.3765	0.3784	0.3763	0.3739	0.3487	0.3551	0.3534	0.3518	0.3587	0.3597	0.3601	0.3553	0.3716	0.3739	0.3739	0.369
19.5	0.3796	0.3888	0.389	0.391	0.3795	0.3894	0.3891	0.3886	0.3772	0.3746	0.3707	0.3769	0.3779	0.3776	0.373	0.3517	0.3534	0.3534	0.3535	0.3605	0.3602	0.3549	0.3579	0.3708	0.3732	0.3727	0.3708
20	0.381	0.3895	0.3922	0.392	0.3813	0.3875	0.3931	0.3913	0.3772	0.3764	0.3708	0.3768	0.3771	0.3773	0.3737	0.3503	0.356	0.3565	0.3501	0.3578	0.3594	0.3597	0.3544	0.3727	0.3754	0.3725	0.3702
20.5	0.3807	0.3882	0.3938	0.3944	0.3792	0.3918	0.3926	0.3918	0.3771	0.375	0.3711	0.3766	0.3774	0.3769	0.3736	0.3494	0.3537	0.3545	0.3527	0.3572	0.3604	0.3571	0.3582	0.3718	0.3725	0.3743	0.3703
21	0.38	0.3888	0.3913	0.3914	0.3796	0.3902	0.3934	0.3923	0.3772	0.3759	0.3717	0.3764	0.3769	0.3761	0.3737	0.3498	0.3543	0.3539	0.3522	0.3558	0.358	0.3581	0.3569	0.3713	0.3744	0.3724	0.3697
21.5	0.3818	0.3908	0.3919	0.392	0.38	0.392	0.3918	0.3924	0.3772	0.377	0.3711	0.3759	0.3783	0.3775	0.3727	0.3505	0.3549	0.3536	0.3538	0.36	0.3595	0.3574	0.3537	0.3706	0.3743	0.3742	0.3701
22	0.3813	0.3907	0.3913	0.3924	0.3805	0.3914	0.3908	0.3916	0.3763	0.3764	0.3722	0.3772	0.3772	0.3775	0.373	0.3525	0.3527	0.3541	0.3526	0.3552	0.3607	0.3605	0.3584	0.3738	0.3752	0.3738	0.3734
22.5	0.3813	0.3892	0.3941	0.3961	0.3822	0.3911	0.3958	0.3895	0.3775	0.3764	0.3716	0.3767	0.3776	0.3781	0.3737	0.351	0.3551	0.354	0.3523	0.361	0.3597	0.3601	0.3565	0.3732	0.3754	0.3734	0.3726
23	0.3836	0.3884	0.3932	0.394	0.3808	0.3922	0.391	0.3887	0.3767	0.376	0.3718	0.3776	0.3773	0.3777	0.3734	0.351	0.3566	0.3564	0.3524	0.3589	0.36	0.3607	0.3581	0.3752	0.3754	0.372	0.3698
23.5	0.3817	0.3889	0.3945	0.3899	0.3836	0.3908	0.3893	0.3911	0.3773	0.3763	0.3705	0.3768	0.3774	0.3776	0.3736	0.3515	0.3573	0.3554	0.3529	0.3592	0.3583	0.3584	0.3578	0.3744	0.3739	0.3715	0.3693
24	0.3811	0.3907	0.3919	0.3928	0.3812	0.3929	0.3941	0.3909	0.3769	0.3772	0.3718	0.3771	0.3772	0.3781	0.3736	0.3485	0.3565	0.3557	0.3512	0.3605	0.3616	0.361	0.3578	0.3748	0.3759	0.3729	0.3714
24.5	0.3831	0.3887	0.3932	0.3951	0.3835	0.3917	0.3903	0.3922	0.3785	0.3764	0.3722	0.3771	0.3775	0.3771	0.3734	0.3512	0.3557	0.3565	0.3512	0.3588	0.3605	0.3601	0.3556	0.3717	0.3716	0.3738	0.3719
25	0.383	0.3905	0.3932	0.3949	0.3804	0.3918	0.3962	0.3934	0.3775	0.3763	0.3716	0.3768	0.3773	0.378	0.374	0.3501	0.3564	0.3561	0.3492	0.3599	0.3591	0.3582	0.3549	0.3743	0.376	0.3718	0.3728
25.5	0.3822	0.3898	0.391	0.3936	0.3834	0.3895	0.3922	0.3926	0.3774	0.3765	0.3726	0.377	0.3772	0.3779	0.3734	0.3523	0.3543	0.3582	0.354	0.3597	0.3593	0.3609	0.362	0.3746	0.3736	0.3727	0.3721
26	0.3789	0.3915	0.3942	0.3946	0.3815	0.3934	0.3922	0.3919	0.3777	0.3768	0.3727	0.378	0.3781	0.3783	0.3739	0.3539	0.3573	0.3539	0.355	0.3576	0.358	0.3612	0.3598	0.3718	0.3755	0.3749	0.3736
26.5	0.382	0.3899	0.3966	0.3925	0.3817	0.3913	0.3925	0.3923	0.3776	0.3765	0.3724	0.3774	0.3774	0.3778	0.3748	0.3512	0.3554	0.3556	0.3538	0.3593	0.3614	0.3561	0.3588	0.3718	0.3746	0.3752	0.3745
27	0.3812	0.3897	0.3947	0.3947	0.3803	0.3948	0.3933	0.392	0.3789	0.3764	0.3728	0.3764	0.3768	0.3778	0.3731	0.3535	0.3577	0.3546	0.3529	0.3584	0.3601	0.3587	0.3579	0.3727	0.3755	0.374	0.3726
27.5	0.3825	0.3905	0.396	0.393	0.3837	0.3907	0.3926	0.3906	0.3775	0.3763	0.3723	0.3773	0.3775	0.3775	0.3736	0.3513	0.3571	0.355	0.3553	0.3619	0.3606	0.3605	0.3583	0.3749	0.3772	0.3741	0.373
28	0.3806	0.3928	0.3931	0.3957	0.3854	0.3921	0.3939	0.3929	0.3783	0.3778	0.3722	0.3777	0.377	0.3778	0.3738	0.3554	0.3576	0.3536	0.3555	0.3615	0.3595	0.3599	0.3584	0.3736	0.3759	0.3732	0.372
28.5	0.3829	0.3917	0.3933	0.3949	0.3841	0.3915	0.3933	0.3921	0.3786	0.3773	0.3726	0.3782	0.3772	0.3785	0.3737	0.3533	0.3571	0.356	0.3526	0.3579	0.362	0.36	0.3577	0.3723	0.3767	0.3749	0.372
29	0.3807	0.3907	0.392	0.3929	0.3822	0.3894	0.3944	0.3933	0.3781	0.377	0.3723	0.3771	0.3782	0.3778	0.374	0.3523	0.3582	0.3575	0.3526	0.3606	0.3595	0.3616	0.359	0.3736	0.3749	0.3741	0.3724
29.5	0.3838	0.3901	0.3934	0.3952	0.3817	0.3907	0.3926	0.3935	0.3781	0.3766	0.372	0.3782	0.3784	0.3783	0.3741	0.3507	0.3573	0.3549	0.3526	0.3576	0.3622	0.3609	0.3595	0.3744	0.3758	0.3724	0.3706
30	0.3816	0.3885	0.3905	0.3896	0.3827	0.3877	0.3894	0.3836	0.374	0.3732	0.3689	0.377	0.3748	0.3754	0.371	0.3532	0.354	0.353	0.3517	0.3581	0.3577	0.3555	0.354	0.3755	0.372	0.3683	0.3698
30.5	0.3682	0.3665	0.3689	0.3688	0.3675	0.3671	0.3667	0.369	0.3628	0.3622	0.3584	0.3705	0.3662	0.3654	0.362	0.3415	0.3415	0.3421	0.3373	0.3473	0.3464	0.3427	0.3419	0.3602	0.3579	0.3563	0.3543
31	0.36	0.3652	0.367	0.367	0.3606	0.3617	0.3623	0.3656	0.3605	0.3608	0.3563	0.3653	0.3645	0.3643	0.3611	0.337	0.3411	0.3409	0.3377	0.3406	0.3432	0.3442	0.3416	0.3517	0.3541	0.353	0.3516
31.5	0.3601	0.362	0.3637	0.3638	0.3571	0.3609	0.3628	0.367	0.3609	0.3601	0.3568	0.3649	0.3638	0.3641	0.3601	0.3353	0.3385	0.3388	0.3352	0.3394	0.3425	0.3408	0.3404	0.3567	0.3528	0.3563	0.3517
32	0.3582	0.3635	0.3667	0.3611	0.3521	0.3621	0.3628	0.3628	0.3599	0.3611	0.3565	0.365	0.3626	0.3629	0.3597	0.3353	0.3377	0.3412	0.3371	0.3383	0.3389	0.3402	0.3395	0.3532	0.354	0.3558	0.3517
32.5	0.3589	0.3619	0.3653	0.3617	0.3559	0.3623	0.3626	0.3605	0.3606	0.3604	0.356	0.3643	0.3631	0.3635	0.3593	0.3347	0.3395	0.3393	0.3382	0.3416	0.3424	0.3402	0.3399	0.3533	0.3543	0.3523	0.3522
33	0.3598	0.3629	0.3642	0.361	0.3587	0.3586	0.3619	0.3627	0.3598	0.359	0.3557	0.3637	0.3617	0.3625	0.36	0.3354	0.3402	0.3384	0.3352	0.34	0.3432	0.3408	0.3384	0.3508	0.3531	0.3525	0.353
33.5	0.3576	0.3618	0.3666	0.3617	0.357	0.3642	0.3617	0.363	0.3603	0.36	0.3556	0.3645	0.3631	0.3635	0.3586	0.3372	0.3394	0.3388	0.3359	0.3403	0.3421	0.3407	0.3388	0.3505	0.352	0.3506	0.3531
34	0.3588	0.3614	0.3684	0.3659	0.3564	0.3616	0.362	0.3619	0.3601	0.3595	0.3547	0.3634	0.3621	0.3633	0.3597	0.3351	0.3367	0.3395	0.3377	0.3382	0.3421	0.3393	0.3378	0.3505	0.3518	0.353	0.3505
34.5	0.3579	0.362	0.3658	0.3628	0.3553	0.3607	0.3634	0.3648	0.3608	0.3594	0.3553	0.3642	0.3621	0.3628	0.359	0.3361	0.3392	0.3373	0.3372	0.3403	0.3401	0.3389	0.3399	0.3514	0.3523	0.3515	0.3517
35	0.3574	0.3596	0.3674	0.3644	0.3555	0.3614	0.36	0.3606	0.3605	0.3596	0.3549	0.3644	0.3628	0.3626	0.3602	0.3338	0.3371	0.339	0.3366	0.3397	0.3411	0.3404	0.3362	0.35	0.3531	0.3537	0.3515
35.5	0.3581	0.3616	0.3676	0.3633	0.3541	0.3626	0.3587	0.3622	0.36	0.359	0.3553	0.3641	0.3616	0.3622	0.3596	0.3364	0.3384	0.3386	0.3361	0.3418	0.3423	0.3379	0.339	0.3507	0.3525	0.352	0.3521
36	0.3582	0.3646	0.3666	0.363	0.3576	0.3626	0.362	0.3623	0.3599	0.3589	0.3546	0.3641	0.3623	0.363	0.3594	0.3371	0.3382	0.3396	0.3349	0.3415	0.3425	0.3383	0.3385	0.3518	0.3532	0.3532	0.3501
36.5	0.3576	0.3617	0.3654	0.3614	0.3552	0.3616	0.362	0.3631	0.3598	0.36	0.355	0.3632	0.3624	0.363	0.3596	0.334	0.3414	0.339	0.3359	0.3381	0.342	0.3398	0.34	0.3524	0.3511	0.3524	0.3515
37	0.3573	0.3648	0.365	0.3627	0.3565	0.3586	0.3624	0.3611	0.3601	0.359	0.3567	0.3645	0.3628	0.3618	0.359	0.3362	0.3392	0.3377	0.3365	0.3401	0.3416	0.337	0.3384	0.3514	0.3514	0.3537	0.3515
37.5	0.3561	0.3621	0.3669	0.3622	0.3562	0.3599	0.3632	0.3587	0.3603	0.3593	0.3555	0.3648	0.3611	0.3628	0.3591	0.3364	0.3396	0.3374	0.3354	0.341	0.341	0.3384	0.3358	0.3478	0.3509	0.3527	0.3506
38	0.3576	0.3612	0.3673	0.3626	0.356	0.3645	0.3617	0.3613	0.3606	0.3596	0.3545	0.3644	0.3611	0.3623	0.359	0.3349	0.3381	0.336	0.3345	0.3399	0.3397	0.3394	0.3382	0.3503	0.353	0.3507	0.3518
38.5	0.3585	0.3605	0.3651	0.3635	0.3544	0.3619	0.3613	0.3623	0.3595	0.3592	0.3545	0.3629	0.3617	0.3626	0.36	0.3358	0.3383	0.3364	0.3378	0.3421	0.34	0.3415	0.338	0.353	0.3533	0.3528	0.3535
39	0.358	0.3607	0.3637	0.361	0.354	0.3618	0.3639	0.3601	0.3595	0.3594	0.356	0.3641	0.362	0.3625	0.3587	0.336	0.337	0.3391	0.3361	0.3403	0.3412	0.34	0.3389	0.3509	0.3513	0.3517	0.352
39.5	0.3567	0.361	0.3635	0.362	0.3556	0.3602	0.3657	0.3601	0.3597	0.358	0.3542	0.3644	0.361	0.3624	0.3588	0.3358	0.3394	0.338	0.3369	0.3417	0.341	0.3414	0.3394	0.3515	0.3522	0.3535	0.3505
40	0.3591	0.3593	0.3648	0.3629	0.3532	0.3629	0.3622	0.3618	0.3596	0.3585	0.355	0.3635	0.362	0.3619	0.3592	0.3383	0.3386	0.3386	0.3356	0.3402	0.3398	0.3404	0.3374	0.3477	0.351	0.3492	0.3522
40.5	0.3573	0.3622	0.3624	0.3615	0.3538	0.3624	0.3629	0.3609	0.3601	0.3597	0.3547	0.3634	0.3625	0.362	0.3588	0.3363	0.3399	0.3406	0.3353	0.3395	0.3378	0.3422	0.3391	0.3504	0.3522	0.351	0.3507
41	0.3565	0.3611	0.363	0.36	0.3553	0.3614	0.3606	0.3591	0.3597	0.3592	0.3545	0.3634	0.361	0.3621	0.3591	0.3353	0.3399	0.3376	0.3364	0.3394	0.3405	0.3405	0.3367	0.3505	0.3517	0.3514	0.3505
41.5	0.3588	0.3621	0.3627	0.3619	0.3567	0.3622	0.3645	0.361	0.3593	0.3588	0.3553	0.3639	0.3617	0.3631	0.3588	0.3355	0.3377	0.3398	0.3366	0.3384	0.3413	0.3404	0.3365	0.3524	0.3489	0.3524	0.3502
42	0.3562	0.3595	0.3654	0.3624	0.3558	0.3636	0.3598	0.3612	0.3594	0.3588	0.3548	0.3629	0.3606	0.363	0.359	0.3373	0.3388	0.3399	0.3372	0.3405	0.344	0.3409	0.3346	0.3499	0.35	0.3526	0.3514
42.5	0.3592	0.3608	0.3637	0.3609	0.3546	0.3635	0.3627	0.3622	0.3598	0.3581	0.3542	0.3636	0.3614	0.3617	0.359	0.3356	0.3398	0.3378	0.3356	0.339	0.3388	0.3385	0.3388	0.3516	0.3517	0.3521	0.3535
43	0.3564	0.3619	0.3616	0.3631	0.355	0.3636	0.3628	0.3618	0.3597	0.358	0.3546	0.3633	0.3619	0.3632	0.3585	0.3375	0.3395	0.3403	0.3374	0.3402	0.3403	0.3392	0.3428	0.3499	0.3527	0.3512	0.3504
43.5	0.3584	0.3614	0.3626	0.3614	0.356	0.3611	0.3645	0.3595	0.3598	0.3586	0.3554	0.3646	0.3607	0.3623	0.3593	0.3366	0.337	0.3395	0.3333	0.3422	0.3407	0.3374	0.3404	0.3498	0.3526	0.35	0.3519
44	0.3597	0.3635	0.3678	0.3608	0.358	0.3607	0.3609	0.3618	0.3595	0.359	0.3544	0.3636	0.3613	0.3626	0.3589	0.3371	0.3389	0.3358	0.3377	0.3411	0.3402	0.3411	0.3372	0.3504	0.3544	0.3534	0.3508
44.5	0.3591	0.3609	0.3623	0.3606	0.3573	0.3598	0.3638	0.3606	0.3599	0.3591	0.3542	0.3635	0.3623	0.3617	0.3582	0.3376	0.339	0.3419	0.3378	0.3422	0.3415	0.3409	0.3358	0.3508	0.3494	0.3481	0.3515
45	0.3581	0.3627	0.365	0.3615	0.3549	0.3623	0.3626	0.3617	0.3586	0.3595	0.3559	0.3635	0.3622	0.3624	0.3591	0.3386	0.3382	0.3397	0.3367	0.3397	0.3417	0.3404	0.3382	0.3522	0.3522	0.3503	0.352
45.5	0.3599	0.3595	0.365	0.3599	0.3579	0.3608	0.3627	0.3611	0.3597	0.3602	0.3547	0.3626	0.3613	0.362	0.3585	0.3362	0.3389	0.3383	0.3354	0.3409	0.3398	0.3402	0.3382	0.3511	0.3512	0.3505	0.3538
46	0.3581	0.3634	0.364	0.3594	0.3553	0.3608	0.3634	0.3588	0.3602	0.3584	0.3547	0.3643	0.3617	0.3625	0.3596	0.337	0.34	0.3407	0.335	0.3406	0.341	0.3393	0.3365	0.3503	0.3524	0.353	0.3496
46.5	0.3577	0.362	0.3623	0.363	0.3568	0.3629	0.3634	0.363	0.3607	0.359	0.3547	0.3628	0.3605	0.3622	0.3588	0.3376	0.3416	0.3386	0.3348	0.336	0.3426	0.3397	0.3376	0.3514	0.3521	0.3522	0.3517
47	0.36	0.3623	0.3643	0.3628	0.3547	0.3609	0.3629	0.3586	0.3596	0.3587	0.3545	0.3639	0.3614	0.3617	0.3593	0.337	0.3379	0.3395	0.3387	0.3392	0.3408	0.3413	0.3422	0.3515	0.3493	0.3526	0.3517
47.5	0.3592	0.3618	0.3652	0.3617	0.3564	0.3634	0.3618	0.3612	0.3595	0.3589	0.3552	0.3645	0.3612	0.3615	0.3581	0.3362	0.3393	0.3388	0.3361	0.3386	0.3422	0.3376	0.337	0.3524	0.3508	0.3539	0.352
48	0.3591	0.3624	0.3645	0.3599	0.3567	0.3643	0.3638	0.3613	0.359	0.3586	0.3539	0.3643	0.3606	0.362	0.3588	0.3363	0.3413	0.3402	0.3334	0.3421	0.3407	0.341	0.3402	0.3512	0.3503	0.3508	0.3509
48.5	0.3604	0.3621	0.3658	0.3656	0.3568	0.3627	0.3622	0.3624	0.3595	0.3586	0.3549	0.3632	0.3615	0.3629	0.3596	0.3389	0.3416	0.3383	0.337	0.3414	0.3399	0.3409	0.3376	0.3504	0.35	0.3514	0.3493
49	0.358	0.3621	0.364	0.3625	0.3564	0.3627	0.3627	0.3636	0.3599	0.3583	0.3539	0.364	0.3615	0.3627	0.3593	0.3363	0.3407	0.3363	0.3363	0.3416	0.3417	0.3399	0.3379	0.3521	0.3514	0.3518	0.3516
49.5	0.3596	0.3628	0.3669	0.3629	0.3549	0.361	0.3631	0.3596	0.359	0.3588	0.3541	0.3635	0.3617	0.3615	0.359	0.3368	0.3381	0.3372	0.3364	0.3418	0.3386	0.3404	0.3379	0.3521	0.3513	0.3516	0.3512
50	0.3609	0.3594	0.3654	0.3641	0.3549	0.3633	0.3645	0.3622	0.3595	0.3591	0.3547	0.3638	0.3611	0.362	0.3588	0.3371	0.3395	0.339	0.3343	0.3417	0.3405	0.3382	0.3393	0.3522	0.3507	0.3517	0.3531
50.5	0.3599	0.3608	0.3662	0.3631	0.3562	0.3625	0.3616	0.3612	0.3599	0.3587	0.3548	0.3639	0.3608	0.3616	0.3583	0.3374	0.3391	0.3382	0.3369	0.3404	0.342	0.3413	0.3394	0.3498	0.3496	0.3522	0.3507
51	0.3587	0.3625	0.3668	0.3594	0.3576	0.3647	0.3615	0.3612	0.3595	0.3592	0.3542	0.3631	0.3614	0.3622	0.3582	0.3374	0.3393	0.3384	0.3365	0.3395	0.339	0.3413	0.338	0.3515	0.3518	0.3529	0.3525
51.5	0.3569	0.3625	0.3677	0.359	0.3573	0.3631	0.3652	0.3609	0.3599	0.3585	0.3541	0.3634	0.3609	0.3624	0.3589	0.3378	0.3402	0.3399	0.3364	0.339	0.34	0.339	0.3405	0.354	0.3521	0.3538	0.353
52	0.3575	0.3596	0.3652	0.3619	0.3568	0.3642	0.3628	0.362	0.3594	0.3591	0.3548	0.3637	0.3612	0.362	0.3581	0.3393	0.3404	0.3391	0.3344	0.3401	0.3422	0.3406	0.3359	0.351	0.3512	0.354	0.351
52.5	0.3593	0.3634	0.3653	0.3617	0.356	0.3615	0.362	0.3647	0.3596	0.3586	0.3546	0.3644	0.3619	0.3617	0.3582	0.3364	0.3395	0.3382	0.3356	0.3405	0.3409	0.3418	0.3376	0.3516	0.3507	0.3536	0.3514
53	0.3571	0.3633	0.3646	0.3579	0.3572	0.3664	0.3634	0.36	0.3591	0.3588	0.3547	0.3645	0.3611	0.3625	0.3585	0.3361	0.3391	0.3385	0.335	0.3389	0.3427	0.3379	0.3384	0.3495	0.3519	0.3514	0.3516
53.5	0.3585	0.3611	0.3631	0.3617	0.3576	0.3617	0.3644	0.3608	0.3596	0.3578	0.3544	0.364	0.3612	0.3628	0.3574	0.3379	0.3381	0.3368	0.334	0.3417	0.3413	0.3387	0.3393	0.3508	0.35	0.3511	0.3501
54	0.3563	0.363	0.3629	0.362	0.3571	0.3637	0.3666	0.3632	0.3599	0.3591	0.3544	0.3638	0.3616	0.3623	0.3587	0.3353	0.3382	0.336	0.3365	0.3409	0.3409	0.34	0.3386	0.351	0.3519	0.3505	0.3514
54.5	0.3575	0.362	0.3616	0.3592	0.3554	0.3665	0.3674	0.3603	0.3593	0.3577	0.3545	0.363	0.3618	0.3621	0.3583	0.3368	0.3382	0.3368	0.3344	0.3395	0.3411	0.3396	0.3393	0.3487	0.3531	0.3526	0.3514
55	0.3585	0.3617	0.3625	0.3605	0.3572	0.364	0.3661	0.3649	0.3603	0.3584	0.3551	0.3639	0.3614	0.3617	0.3587	0.3362	0.3393	0.3394	0.3364	0.341	0.3416	0.3398	0.338	0.3504	0.351	0.3498	0.35
55.5	0.3597	0.3639	0.3674	0.3604	0.3558	0.3669	0.3651	0.3624	0.3594	0.3589	0.355	0.3639	0.3607	0.362	0.3572	0.3382	0.3395	0.3382	0.3375	0.339	0.3411	0.3391	0.3378	0.3502	0.3505	0.3516	0.3537
56	0.3582	0.3594	0.3631	0.3622	0.3578	0.3626	0.3661	0.3634	0.3601	0.358	0.3544	0.3632	0.362	0.3623	0.3586	0.3359	0.3417	0.338	0.3366	0.3404	0.3397	0.3407	0.3369	0.3505	0.3522	0.3526	0.351
56.5	0.3583	0.3608	0.3634	0.3651	0.3568	0.3656	0.366	0.3625	0.3593	0.3584	0.3548	0.3631	0.3608	0.3617	0.3587	0.3369	0.3391	0.3394	0.3375	0.3405	0.3408	0.3393	0.3391	0.3505	0.352	0.3537	0.3498
57	0.3564	0.3664	0.3629	0.3621	0.3565	0.3621	0.3653	0.3634	0.3598	0.3586	0.3544	0.363	0.3612	0.362	0.3574	0.3368	0.3407	0.3396	0.3368	0.3408	0.342	0.3396	0.342	0.3518	0.3518	0.3516	0.3523
57.5	0.3588	0.3602	0.3647	0.3615	0.354	0.3684	0.3675	0.3626	0.3591	0.3585	0.3548	0.3646	0.3616	0.3615	0.3573	0.3363	0.3397	0.3412	0.3344	0.34	0.3419	0.3406	0.3382	0.3509	0.3513	0.3512	0.3517
58	0.3581	0.3617	0.3649	0.3616	0.3554	0.3657	0.3654	0.3644	0.3595	0.3585	0.354	0.3642	0.3612	0.3621	0.3583	0.3376	0.3408	0.3374	0.3363	0.3421	0.3413	0.3401	0.3379	0.351	0.3525	0.3508	0.3537
58.5	0.3585	0.3628	0.3608	0.365	0.3569	0.3671	0.3673	0.3672	0.3595	0.358	0.3551	0.3638	0.3609	0.3618	0.3591	0.3375	0.3387	0.3378	0.3371	0.342	0.3436	0.3389	0.3378	0.35	0.3536	0.3508	0.3523
59	0.3601	0.3622	0.3628	0.3609	0.358	0.3648	0.3651	0.3625	0.3597	0.3579	0.355	0.363	0.3622	0.3618	0.3582	0.3388	0.3383	0.3378	0.3364	0.3409	0.3427	0.3401	0.3409	0.3511	0.3504	0.3533	0.3529
59.5	0.3573	0.3621	0.3616	0.359	0.3586	0.3661	0.3676	0.3674	0.36	0.358	0.354	0.3643	0.361	0.361	0.3581	0.3367	0.3375	0.338	0.3393	0.3396	0.3402	0.3406	0.3386	0.3518	0.3509	0.3519	0.3534
