# Supplementary material for: Visualization of endogenous G proteins on endosomes and other organelles
Source: eLife. 2024 Nov 8;13:RP97033. doi: 10.7554/eLife.97033 (PMC11548881; doi:10.7554/eLife.97033)
Supplement: Figure 2—figure supplement 2—source data 1. [file elife-97033-fig2-figsupp2-data1.xlsx]

## Sheet: panel C
Distance	FM
-1.5	0.0743771	0.0506641	0.130561	0.0735067	0.0812524	0.116141	0.00739612	0.0680115	0.0590817	0.0126433	0.0120661	0.0234011	0.10674	0.205775	0.208981	0	0.0857328	0.048416	0.0251883	0	0.0297115	0.156197	0.034121	0.0443074	0.305951	0.00936487	0.0335796	0.0701877	0.147751	0.11564	0.0574028	0.0835383	0.229516	0.116199	0.111929	0.0827643	0.112832	0.0809664	0.133599	0.0981812	0.0670354	0.0422887	0.0347439	0	0	0	0.070279	0.100035	0.110803
-1.46389	0.0319018	0.068785	0.0437826	0.0352479	0.072116	0.156122	0.0289499	0.0681203	0.0299224	0.0389289	0.03521	0.116102	0.128259	0.289249	0.27402	0.035033	0.150261	0.0266998	0.0174227	0.00378108	0.144264	0.0244661	0.081602	0.0404615	0.304568	0.034503	0.0260779	0.163362	0.0486567	0.259377	0.0256303	0.0564719	0.233183	0.0705503	0.0873548	0.0748465	0.0430858	0.0837168	0.0720749	0.074819	0.0251383	0.0412695	0.0347439	0	0.0903239	0.110902	0.0409563	0.0919022	0.0466094
-1.42778	0.0892525	0.128374	0.094251	0.0609312	0.0875837	0.194855	0.012208	0.0417862	0.00914585	0.10762	0.00261713	0.262221	0.133611	0.131072	0.308982	0.0640756	0.0996607	0.0796249	0.0182817	0.0623443	0.00215408	0.189041	0.0170605	0.0483748	0.24582	0.0392117	0.131417	0.254992	0.194627	0.177641	0.0629149	0.0346777	0.349076	0.0694939	0.164667	0.142989	0.0303035	0.0836974	0.0699285	0.125093	0.0997319	0.082539	0.0397679	0	0.0224444	0.110902	0.0416497	0.0831641	0.0556011
-1.39167	0.155206	0.106091	0.0955609	0.125936	0.0898823	0.21232	0.03569	0.0539467	0.0487154	0.0513573	0.0107581	0.394	0.0998475	0.164439	0.310588	0.031974	0.148875	0.0330907	0.00509055	0.0400934	0.0662269	0.150034	0.0318604	0.0519194	0.363546	0.0361316	0.145047	0.143499	0.0949395	0.231281	0.0318284	0.0744698	0.260287	0.0988516	0.232949	0.167198	0.0774513	0.101774	0.0742214	0.0964066	0.0761421	0.0845773	0.0619536	0	0.00526456	0.0948653	0.0479771	0.0503276	0.0570803
-1.35556	0.0595017	0.0925802	0.0445692	0.0756325	0.111599	0.196873	0.0420898	0.0485738	0.029951	0.0362738	0.00485297	0.301912	0.122518	0.135839	0.308302	0.0700498	0.149497	0.0171134	0.011375	0.0623443	0.0678314	0.144226	0.0583758	0.0175723	0.320235	0.0452445	0.177589	0.0502193	0.180386	0.177408	0.0222981	0.0720657	0.213896	0.106159	0.229882	0.165625	0.0514676	0.104213	0.0742214	0.058554	0.112341	0	0.0324422	0	0.134653	0	0.0767705	0.0967839	0.0391801
-1.31945	0.0856675	0.0499464	0.0557115	0.134969	0.100063	0.186986	0.0478529	0.0562183	0.0346784	0.0132755	0.0332034	0.260618	0.0807091	0.154215	0.253084	0.0560168	0.0990594	0.0174185	0.0643334	0.119026	0.0662269	0.130197	0.00616566	0.0512459	0.339586	0.0277144	0.158187	0.325952	0.123125	0.189483	0.0287014	0.0666821	0.251809	0.0894849	0.117226	0.172495	0.0203259	0.0947858	0.0486462	0.0427321	0.0573622	0.00509578	0.0820461	0	0.0203119	0.137629	0.049795	0.100035	0.0109695
-1.28334	0.140152	0.0543626	0.0870407	0.102201	0.138923	0.113397	0.0349238	0.0657943	0.0647544	0.065973	0.0194626	0.232778	0.112774	0.0892654	0.216294	0.0151128	0.136436	0.00035182	0.0609506	0.0377934	0.116335	0.184596	0.0392596	0.0515738	0.322078	0.022279	0.121357	0.157536	0.112446	0.130038	0.0238896	0.0473848	0.378478	0.095813	0.190243	0.199421	0.0353971	0.0598042	0.0570525	0.0649125	0.0716072	0.0361737	0.0422782	0.00281699	0.0174863	0.0788289	0.0666104	0.054234	0.102271
-1.24723	0.119003	0.0550635	0.0634451	0.128593	0.0561671	0.18282	0.0285239	0.0835045	0.0679912	0.0498654	0.0398748	0.186921	0.0993474	0.0969559	0.255373	0.0451785	0.126054	0.0208689	0.106209	0.0518548	0.0297115	0.155174	0.0170605	0.0411173	0.211031	0.0491871	0.0869845	0.336234	0.123125	0.174156	0.0242025	0.0338423	0.429374	0.0354378	0.128892	0.209076	0.140799	0.151842	0.0593771	0.0328257	0.0311782	0.0351546	0.0611163	0.0115872	0.0937758	0.0734945	0.061883	0.0883009	0.0451745
-1.21112	0.215066	0.086281	0.0213674	0.136564	0.0485555	0.162669	0.0292975	0.165948	0.0524215	0.0129341	0.043141	0.142536	0.101006	0.135174	0.268284	0.0895405	0.109968	0.0616384	0.042072	0.052273	0.0297115	0.172626	0.0485098	0.0669396	0.172788	0.0374473	0.0921592	0.319495	0.107993	0.096367	0.0178092	0.0711654	0.348488	0.065669	0.156074	0.227285	0.0832702	0.160101	0.068499	0.0434722	0.0540204	0.0422887	0.0640452	0.00267301	0.171198	0	0.0957317	0.143545	0.0400332
-1.17501	0.0620112	0.122472	0.074719	0.0591597	0.0451366	0.115095	0.0388356	0.114123	0.045514	0.0601823	0.0304958	0.0941099	0.0937207	0.142316	0.199572	0.0246809	0.127818	0.0852622	0.0703887	0.00608109	0.0501084	0.129161	0.02816	0.0919201	0.38912	0.0518355	0.0265984	0.0901913	0.147751	0.15651	0.0181235	0.0715738	0.248022	0.0922873	0.187447	0.302697	0.054498	0.17964	0.141468	0.0527871	0.0543221	0.0845773	0.076395	0	0.152552	0	0.0425891	0.105457	0.0505042
-1.1389	0.092299	0.0980773	0.101722	0.111057	0.0518228	0.0957725	0.0313751	0.0976781	0.0529997	0.0864931	0.0419429	0.106571	0.0854071	0.172157	0.205725	0.036362	0.177847	0.0555525	0.0728344	0.0377934	0.0297115	0.115131	0.0312429	0.0693322	0.262408	0.05292	0.163939	0.206106	0.122236	0.290494	0.0370133	0.0473477	0.24313	0.0244928	0.125609	0.305428	0.021825	0.154812	0.133599	0.0309038	0.0648936	0	0.0443715	0	0.119952	0.106898	0.04492	0.0724754	0.0376454
-1.10279	0.162734	0.0951135	0.0377528	0.10592	0.0541719	0.100433	0.0336975	0.147871	0.0311403	0.021304	0.0441751	0.141273	0.162603	0.23962	0.199115	0.0982922	0.106178	0.0378419	0.00455152	0.0138523	0.101123	0.156197	0.0310381	0.0849727	0.150671	0.00958214	0.210131	0.180242	0.142707	0.107513	0.0215892	0.041565	0.303347	0.100657	0.106433	0.325719	0.0290301	0.126633	0.144865	0.0317911	0.056598	0.0621601	0.0833021	0	0.0758363	0.0521127	0.0278914	0.0981193	0.00628255
-1.06668	0.119003	0.0754727	0.0340819	0.0931668	0.0510978	0.0970355	0.0374273	0.147476	0.0165758	0.050978	0.0175923	0.19097	0.171723	0.161966	0.178766	0.125864	0.0861884	0.0791376	0.0307524	0.105801	0.0549514	0.286905	0.0637192	0.083608	0.24513	0.0202347	0.0773304	0.150272	0.116004	0.181124	0.0178107	0.0592101	0.292414	0.0895634	0.103022	0.319001	0.033624	0.126682	0.149874	0.034896	0.0650846	0.0300588	0.0544177	0.02786	0.181234	0.110902	0.033413	0.14179	0.00228255
-1.03057	0.110579	0.1011	0.0503367	0.148785	0.0651328	0.0489823	0.0228688	0.127821	0.0331372	0.0202041	0.0120999	0.149262	0.0260323	0.197145	0.151469	0.0747316	0.10893	0.0270516	0.014511	0.052273	0.0698072	0.126093	0.0330939	0.0588579	0.200895	0.00936487	0.0358026	0.199579	0.0985003	0.0622319	0.0154672	0.0530561	0.436745	0.0712823	0.157666	0.262777	0.0133303	0.207196	0.193154	0.0307553	0.0460365	0	0.0410222	0.00506119	0.0830601	0	0.0508961	0.0723053	0.0967922
-0.99446	0.114523	0.0525134	0.0727519	0.124873	0.0326788	0.0837955	0.0404094	0.0952025	0.0418459	0.0761509	0.0496145	0.152557	0.0530985	0.145641	0.0535144	0.137952	0.0988708	0.038849	0.0195688	0.0182607	0.0968298	0.0148813	0.0846865	0.0573515	0.286599	0.00936487	0.0827233	0.245376	0.196705	0.240569	0.00902372	0.070562	0.262296	0.0673335	0.147374	0.284158	0.0333984	0.131311	0.108023	0.0405145	0.0938328	0.0285322	0.0357897	0.0220414	0.0452486	0.260552	0.0435753	0.0645876	0.018687
-0.95835	0.0784991	0.0556461	0.0583325	0.164195	0.0227507	0.0775384	0.0233962	0.163717	0.0436546	0.0118721	0.0458281	0.12085	0.108361	0.175953	0.18131	0.106092	0.0677914	0.0463777	0.0324198	0.026241	0.142467	0.0521839	0.034121	0.0727084	0.309637	0.0342904	0.162223	0.197543	0.161398	0.137236	0.0151386	0.0763447	0.361302	0.115341	0.0676638	0.221588	0.0768549	0.125038	0.247524	0.0490906	0.0916407	0.0540069	0.115744	0.0462675	0.14946	0.0614617	0.0765456	0.0711949	0.0240609
-0.92224	0.164705	0.0725173	0.0251689	0.0541994	0.0576883	0.0503179	0.0215782	0.104302	0.060552	0.118203	0.0166307	0.0516556	0.0898384	0.135697	0.107162	0.0789778	0.137838	0.113397	0.0514219	0.0761966	0.0554862	0.180152	0.140184	0.0495888	0.0382438	0.0258377	0.143788	0.344411	0.0777315	0.105424	0.0216624	0.0548011	0.301811	0.0604439	0.149137	0.225712	0.0860104	0.13072	0.204422	0.0301637	0.0154718	0.0326088	0.0906278	0.0103039	0.00197254	0.171032	0.0586057	0.0849697	0.0699668
-0.88613	0.0716891	0.0722893	0.0781267	0.149316	0.0357781	0.0796725	0.0290682	0.109893	0.0186175	0.117697	0.0297634	0.0713032	0.0665523	0.151894	0.174135	0.0858717	0.136487	0.115201	0.0440039	0.256329	0.0297115	0.171589	0.0326828	0.0772898	0.209419	0.0304518	0.206786	0.358449	0.167926	0.278884	0.0358524	0.0804752	0.33498	0.056893	0.136878	0.182013	0.0835926	0.126382	0.164538	0.064764	0.0411429	0.0346471	0.078907	0.00826943	0.00783687	0.181723	0.0859887	0.0986795	0.0196842
-0.85002	0.0996474	0.0695618	0.0681649	0.0867908	0.0707654	0.0797305	0.0153026	0.0613736	0.0239289	0.0497895	0.0678898	0.12579	0.102504	0.150233	0.076342	0.146439	0.13309	0.170531	0.0548324	0.296214	0.0483258	0.153456	0.0733805	0.0353219	0.194445	0.0449645	0.117045	0.254009	0.141222	0.152329	0.0233472	0.0847728	0.35201	0.0694648	0.0596161	0.165267	0.0724222	0.0930328	0.255393	0.0351918	0.0193933	0	0.104232	0.0061786	0	0	0.0550753	0.103261	0
-0.81391	0.0892525	0.0820505	0.0335575	0.147013	0.087015	0.0830841	0.0242926	0.0625842	0.0526443	0.067781	0.0972381	0.0397538	0.112251	0.129411	0.0229948	0.0767615	0.158667	0.0858464	0.00607038	0.234915	0.0297115	0.120612	0.0705024	0.0567135	0.139384	0.0160636	0.0309268	0.355185	0.210352	0.265183	0.0476128	0.0892839	0.313148	0.0651219	0.0587346	0.167832	0.0848015	0.095776	0.125014	0.0582583	0.0670354	0.0652176	0.117209	0.00105481	0.0727976	0.0187091	0.0648558	0.2274	0
-0.7778	0.14983	0.0571069	0.033033	0.0628791	0.0944468	0.0361052	0.0538726	0.0707863	0.0271978	0.132022	0.108843	0.0583554	0.0575038	0.162997	0.0336055	0.140227	0.198764	0.0972613	0.0169945	0.0640344	0.127789	0.244817	0.130729	0.0626507	0.246512	0.0278774	0.107213	0.423653	0.164959	0.176712	0.0422872	0.0667657	0.331179	0.0578575	0.120673	0.184661	0.0969068	0.118307	0.262368	0.0245453	0.0502296	0.125339	0.127463	0.00850418	0.028242	0.106898	0.0675451	0.154024	0.0157064
-0.74169	0.231017	0.054903	0.0327708	0.169332	0.145769	0.143651	0.0120342	0.102194	0.0396531	0.210398	0.0670174	0.133419	0.0519915	0.136601	0.0739192	0.235365	0.203192	0.138497	0.0226543	0.248349	0.141397	0.0699761	0.0252819	0.0427832	0.199512	0.0372975	0.202116	0.369082	0.159322	0.362943	0.134816	0.0408038	0.243924	0.0772821	0.149965	0.148369	0.0987121	0.0984738	0.149874	0.0248411	0.0857181	0.0845773	0.119721	0.00348994	0.0887378	0	0.0484316	0.0716151	0.00760111
-0.70557	0.11291	0.0908914	0.0262167	0.105566	0.115574	0.0861618	0.0383267	0.112205	0.0936783	0.22069	0.0293363	0.247907	0.0952836	0.180199	0.0662747	0.101933	0.139203	0.220541	0.0318178	0.267655	0.0651573	0.151071	0.0402866	0.0487913	0.146294	0.0465987	0.264372	0.265099	0.124608	0.215026	0.0777134	0.0456026	0.287696	0.0853173	0.12559	0.17175	0.0760812	0.103335	0.206031	0.0476117	0.0688353	0	0.107371	0.0186015	0.0135812	0.20844	0.0470658	0.233652	0
-0.66946	0.152159	0.0695534	0.0289704	0.0859058	0.137052	0.0788305	0.0257141	0.0937606	0.0237137	0.221929	0.0888377	0.115634	0.068832	0.203111	0.0686529	0.153331	0.0907176	0.132166	0.0201204	0.446533	0.0497519	0.156538	0.102363	0.11955	0.248585	0.0339617	0.13231	0.193016	0.112148	0.222224	0.041	0.0331926	0.33999	0.0458212	0.0415284	0.118684	0.0839633	0.0889659	0.145223	0.0245453	0.0195106	0.0377046	0.0810003	0.0247019	0.0837532	0	0.108359	0.284199	0.0352244
-0.63335	0.178505	0.0415024	0.0561043	0.185272	0.10452	0.108054	0.0536441	0.116041	0.0143526	0.163086	0.0254124	0.0858025	0.0549497	0.173954	0.0624531	0.0990114	0.0885596	0.146186	0.0245661	0.442752	0.112933	0.135323	0.0431647	0.0825801	0.135926	0.0234703	0.0715984	0.349149	0.112741	0.242427	0.102807	0.102502	0.392694	0.0322065	0.0674847	0.119443	0.0637019	0.0769432	0.131274	0.034156	0.0483526	0.0978264	0.13186	0.0239381	0.178662	0.0935344	0.108881	0.28564	0.0152465
-0.59724	0.207897	0.0572842	0.0370968	0.141346	0.0764206	0.0431172	0.0682248	0.125971	0.0321683	0.283249	0.0843117	0.0711417	0.122548	0.139001	0.038908	0.0890705	0.0988279	0.118626	0.0392383	0.269345	0.0814392	0.103842	0.184994	0.0410818	0.121642	0.0137092	0.0901041	0.531637	0.0937526	0.299782	0.0841023	0.083167	0.232916	0.0402165	0.0790973	0.104945	0.106401	0.0563988	0.0745792	0.0245453	0.0392257	0.135527	0.124953	0.0317694	0.182087	0.088189	0.147462	0.230201	0.047108
-0.56113	0.197144	0.073387	0.0979208	0.088208	0.0878221	0.0692924	0.0565826	0.122421	0.0511648	0.278179	0.0755409	0.0270143	0.0893245	0.15985	0.0526645	0.158719	0.162824	0.0527412	0.0575754	0.310066	0.0395609	0.231129	0.0935238	0.0915922	0.267246	0.0177193	0.126642	0.518372	0.138553	0.276793	0.105205	0.0632385	0.321569	0.0669704	0.0477544	0.076557	0.0804816	0.0788508	0.093179	0.0428806	0.0586124	0.158963	0.193812	0.0124855	0.271438	0.165687	0.178858	0.242285	0.0474238
-0.52502	0.284784	0.0823207	0.0663294	0.205464	0.0461405	0.0888912	0.0542831	0.134581	0.0254338	0.219805	0.083163	0.00563967	0.0772034	0.227553	0.0462168	0.184585	0.0475205	0.0718897	0.0467595	0.125333	0.0771459	0.125057	0.280984	0.104636	0.265864	0.00225693	0.194795	0.409826	0.0750622	0.313948	0.142233	0.15592	0.397924	0.046011	0.104167	0.0924202	0.0558842	0.0617102	0.0801235	0.0490906	0.0497134	0.128904	0.126628	0.0311716	0.315967	0.144305	0.18739	0.263367	0.00803324
-0.48891	0.228687	0.068937	0.119943	0.089271	0.061769	0.163642	0.0454255	0.185277	0.0292412	0.194986	0.0216996	0.0532048	0.0754986	0.11051	0.069082	0.193554	0.0940109	0.131019	0.0273822	0.190831	0.191149	0.212314	0.155189	0.139542	0.217483	0.0179618	0.236014	0.443516	0.271469	0.15767	0.112531	0.188017	0.300387	0.0729847	0.14361	0.0855369	0.111317	0.0840245	0.149874	0.0288334	0.0643539	0.0845773	0.158022	0.0463019	0.139264	0.0774981	0.28351	0.287906	0.0468864
-0.4528	0.279586	0.0679913	0.117453	0.345748	0.0582173	0.133939	0.0576831	0.122842	0.0335761	0.297093	0.0637813	0.0777455	0.0775709	0.154263	0.0997283	0.233836	0.10183	0.110314	0.0543211	0.0623443	0.193125	0.218477	0.204726	0.054569	0.294661	0.0437499	0.140447	0.691841	0.312709	0.278186	0.123105	0.31778	0.236514	0.0894878	0.11668	0.114904	0.1177	0.0904168	0.0887079	0.0490906	0.0328507	0.130943	0.13165	0.0828101	0.108503	0.133614	0.351786	0.604347	0.0331801
-0.41669	0.316506	0.0657536	0.0870407	0.147013	0.0673384	0.107024	0.0602	0.104534	0.0432638	0.219628	0.18701	0.0359628	0.105903	0.239999	0.123956	0.151785	0.164772	0.121915	0.070167	0.0409298	0.35278	0.364237	0.247479	0.113188	0.317701	0.028546	0.121699	0.803229	0.161398	0.192965	0.14061	0.333244	0.405969	0.0844187	0.151711	0.0822264	0.139767	0.0975249	0.166685	0.0776282	0.0690531	0.119732	0.315626	0.0625998	0.167466	0	0.450001	0.690677	0.0411246
-0.38058	0.327259	0.0569718	0.0817976	0.192889	0.0904583	0.172367	0.085477	0.198403	0.0515268	0.294109	0.136216	0.069279	0.0993245	0.392348	0.122318	0.333431	0.159687	0.064482	0.0475756	0.209719	0.371929	0.347126	0.455905	0.111557	0.191219	0.0260634	0.392764	1.19589	0.17208	0.413333	0.212132	0.333782	0.35793	0.0548886	0.175784	0.152507	0.0871226	0.0804045	0.312624	0.0863516	0.105172	0.179854	0.208464	0.0687064	0.392043	0.109571	0.510643	0.681484	0.0680831
-0.34447	0.436943	0.0661589	0.0643633	0.290307	0.112252	0.200125	0.120674	0.249643	0.0587264	0.244029	0.212315	0.122081	0.159651	0.156852	0.208143	0.444255	0.137127	0.0690121	0.0141986	0.385653	0.379802	0.346089	0.452	0.209866	0.388429	0.0653912	0.366723	1.29788	0.181573	0.477423	0.384577	0.402153	0.306525	0.140652	0.229275	0.100103	0.039862	0.111781	0.377903	0.126276	0.130032	0.207878	0.228137	0.0628627	0.47613	0.171032	0.420723	0.775276	0.166022
-0.30836	0.47673	0.0810964	0.0633145	0.328035	0.115226	0.221364	0.139155	0.210849	0.102401	0.25685	0.282767	0.162666	0.18384	0.126692	0.308784	0.662779	0.147218	0.0697529	0.0819677	0.548135	0.599771	0.46859	0.42795	0.223832	0.146526	0.0827827	0.329385	1.89854	0.423076	0.558928	0.387399	0.428004	0.315316	0.158521	0.173865	0.163115	0.0997598	0.104869	0.530996	0.0959635	0.210156	0.144187	0.298044	0.166681	0.554552	0.221803	0.500023	0.867063	0.25056
-0.27225	0.594838	0.106868	0.132527	0.398176	0.147342	0.375657	0.15381	0.259137	0.176326	0.450849	0.191532	0.0986146	0.177801	0.195576	0.143056	0.553138	0.16453	0.0736698	0.249649	0.521266	0.559512	0.650616	0.469677	0.313749	0.326916	0.169368	0.54495	2.57835	0.539378	0.924892	0.417364	0.514178	0.426294	0.287853	0.247659	0.246307	0.172246	0.0926855	0.560327	0.0992158	0.279447	0.345951	0.319184	0.3548	0.938731	0.301974	0.529074	1.00645	0.23364
-0.23614	0.614731	0.160462	0.113913	0.583271	0.254198	0.466668	0.186384	0.35317	0.270824	0.64127	0.304164	0.116442	0.357211	0.214701	0.237455	0.757492	0.127259	0.0499201	0.382204	1.04441	0.909959	0.619136	0.746961	0.35702	0.272545	0.191834	1.17235	3.02846	0.537896	1.03287	0.483356	0.553868	0.496044	0.345133	0.267994	0.35041	0.449588	0.172105	0.80338	0.0904924	0.418294	0.429509	0.447695	0.440771	1.15067	0.443607	0.58724	0.909363	0.227784
-0.20003	0.721906	0.210552	0.20895	0.505513	0.279378	0.795709	0.217263	0.443312	0.402038	0.783786	0.477303	0.292916	0.302693	0.260287	0.51923	0.78417	0.158699	0.0659071	0.350059	1.36225	1.01413	0.717681	0.894133	0.405368	0.666963	0.281527	1.08592	3.62913	0.837253	1.27019	0.638532	0.685469	0.635889	0.372428	0.197045	0.647645	0.577911	0.246884	0.853099	0.14328	0.6127	0.507464	0.462346	0.456236	1.84711	0.873849	0.66301	0.737838	0.239895
-0.16392	1.01959	0.267566	0.325223	0.744632	0.378135	1.17668	0.268904	0.561843	0.543654	1.05792	0.546056	0.222451	0.414035	0.29271	0.807927	0.690239	0.168726	0.148013	0.574101	1.51424	1.31733	0.959928	1.11571	0.556873	0.884678	0.22481	1.33281	3.58972	0.990344	1.65821	0.643813	0.887251	0.824216	0.524111	0.245622	0.66817	0.690791	0.299687	0.852384	0.152594	0.820275	0.498292	0.52074	0.465933	1.68868	0.539814	0.571516	0.769249	0.43559
-0.12781	0.938764	0.4711	0.397189	0.854449	0.515159	1.47078	0.404148	0.698083	0.562091	1.45773	0.586095	0.254735	0.584843	0.434657	1.04014	0.978046	0.369178	0.276105	0.791799	1.68218	1.235	1.2932	1.22301	0.756292	1.00056	0.232485	2.12103	3.75325	1.61843	1.82192	0.583619	0.796631	0.991118	0.589855	0.293838	0.817601	1.09823	0.372725	0.776732	0.290404	0.895586	0.627196	0.633554	0.747166	2.26923	0.518432	0.673184	0.759076	0.532305
-0.0917	1.36639	0.813522	0.594079	0.945138	0.559594	1.84051	0.562516	0.897044	0.725529	1.84703	0.686551	0.666438	0.770619	0.50813	1.13062	1.15663	0.614385	0.463777	0.775001	1.92487	1.39984	1.43451	1.31674	0.886671	0.662817	0.393807	1.835	4.14897	1.80149	1.63011	0.674189	1.07576	1.15032	0.60775	0.339833	1.07434	1.76012	0.572822	0.979723	0.348514	0.887749	0.681714	0.4073	0.556493	2.43435	1.16246	0.587563	0.673536	0.709391
-0.05559	0.960629	0.906288	0.615971	0.996148	0.452093	2.32428	0.473781	1.19776	0.837789	1.87704	0.936097	0.917745	0.784029	0.769445	1.27044	1.11823	0.714921	0.72654	1.07084	2.71757	1.63467	1.07046	1.51242	0.959149	1.40396	0.471464	2.89557	4.01007	2.24059	1.92641	0.640453	1.28054	1.47501	0.562159	0.421597	1.49479	1.50384	0.618115	0.86222	0.249002	0.93398	0.931877	0.559671	0.822573	2.66166	1.14109	0.651081	0.679683	0.780399
-0.01948	0.924964	0.895666	0.655165	1.01705	0.468518	1.76418	0.437923	1.34123	0.711155	2.35137	1.14606	1.10302	0.963231	0.999413	1.36357	0.981269	0.719491	0.985972	0.93743	2.13816	1.73221	1.48481	1.51777	1.01475	1.11091	0.548449	2.31659	3.94076	2.30526	1.81541	0.871754	1.12431	1.40277	0.600362	0.376674	1.75702	1.43016	0.645472	1.36514	0.356794	0.848443	0.886535	0.570136	0.868556	2.06132	1.21457	0.523251	0.629235	0.704449
0.01663	0.982136	0.890566	0.82597	1.01705	0.616231	2.1	0.413683	1.47748	0.556952	2.30537	1.09719	1.40042	0.927589	0.934547	1.29765	1.35654	0.743396	1.20829	1.0392	2.4056	1.66206	1.55667	1.4559	0.730584	1.07014	0.414609	3.02864	4.00719	2.17057	1.67028	0.723274	1.02361	1.26961	0.669325	0.560075	1.58165	1.01999	0.630534	1.00548	0.293656	0.58605	0.676619	0.451044	0.821666	1.942	1.76106	0.579982	0.567669	0.797762
0.05274	0.800585	0.674998	0.925463	0.851439	0.58052	2.57542	0.553992	1.61074	0.711837	1.73736	1.09518	1.2504	0.526789	1.00258	1.22332	0.969876	0.680937	1.29619	0.923191	2.29393	1.71092	0.995172	1.20163	0.644469	0.954714	0.505001	2.08837	3.79196	1.82226	1.488	0.704886	1.00054	1.25772	0.586059	0.542273	1.6432	1.26931	0.677252	0.536541	0.176252	0.654496	0.68426	0.550671	0.997987	2.20912	0.911268	0.652337	0.622818	0.824111
0.08885	1.02246	0.573003	0.754003	0.665634	0.480773	2.07326	0.317876	1.50406	0.595388	1.39748	0.975421	0.66421	0.429561	0.997749	1.19071	0.729796	0.727668	1.14659	0.947067	2.34305	1.32807	0.754984	1.24069	0.576014	0.908637	0.493204	1.67363	3.1554	1.51014	1.29898	0.649346	0.996993	1.30871	0.552907	0.551974	1.7466	0.695466	0.58872	0.425298	0.142392	0.275478	0.930351	0.480137	1.0582	2.18119	1.13574	0.599278	0.665698	0.7381
0.12496	0.754524	0.521731	0.533255	0.419076	0.396653	2.03921	0.335654	1.27471	0.42847	0.944369	0.760951	0.725006	0.272784	0.840472	1.30387	0.734227	0.612717	1.10244	0.890723	1.82157	1.74028	0.702971	1.16916	0.611531	0.892049	0.37998	1.51524	2.66292	1.18675	0.936733	0.560538	0.825535	1.22238	0.450177	0.428746	1.5163	0.736617	0.569376	0.487357	0.0819162	0.385996	0.838639	0.421533	1.02554	2.25307	0.204436	0.414974	0.678447	0.835812
0.16107	0.327259	0.349034	0.774452	0.500554	0.282846	1.41427	0.214993	1.18159	0.363614	0.942485	0.547562	0.326579	0.135895	0.665298	1.07604	0.84138	0.471162	0.872887	0.702343	1.30766	0.784309	0.784406	0.792181	0.522942	0.742068	0.281413	0.992418	2.20453	0.887392	0.715902	0.334744	0.584657	1.32575	0.350291	0.516135	1.55653	0.527475	0.59666	0.191009	0.0859085	0.28359	0.803485	0.358742	0.985668	2.01866	0.791006	0.455335	0.682819	0.826909
0.19718	0.309516	0.255778	0.523686	0.264624	0.360027	1.13967	0.146503	0.982943	0.266724	0.785202	0.504525	0.150996	0.123753	0.540591	1.07032	0.705859	0.336686	0.777109	0.45558	0.881079	0.567386	0.615713	1.10461	0.416445	0.458926	0.24472	0.652898	1.66812	0.69603	0.416585	0.300438	0.379812	1.00405	0.311094	0.401914	1.32961	0.619336	0.568951	0.197805	0.0736359	0.217989	0.687829	0.30202	0.97933	1.61427	0.420894	0.562504	0.612509	0.62944
0.23329	0.383893	0.1583	0.49642	0.337246	0.290711	1.18272	0.140992	0.983419	0.164876	0.650045	0.385191	0.195753	0.185003	0.295529	0.764859	0.53654	0.347399	0.79735	0.288368	0.888223	0.181314	0.530174	0.77286	0.351942	0.626186	0.206839	0.505262	1.10781	0.744983	0.388951	0.312497	0.388165	0.857787	0.284956	0.507334	0.953955	0.376956	0.480983	0.240371	0.0743747	0.164713	0.734702	0.202394	0.781136	0.916807	0.0347455	0.56769	0.396519	0.649634
0.2694	0.221877	0.105863	0.484885	0.228491	0.206395	0.804216	0.0940439	0.68459	0.14209	0.444692	0.256761	0.146559	0.0673895	0.322098	0.651659	0.503703	0.279276	0.65022	0.341188	0.403704	0.254702	0.3632	0.753539	0.231621	0.469523	0.121789	0.479829	0.905562	0.429604	0.256592	0.190913	0.26038	0.836371	0.298401	0.367949	0.751748	0.29064	0.42491	0.180993	0.048056	0.147411	0.615478	0.201975	0.725653	0.971438	0.150981	0.443315	0.406727	0.59405
0.30551	0.165959	0.0965743	0.455915	0.157817	0.150143	0.679684	0.0740233	0.438416	0.16959	0.384939	0.194033	0.164175	0.101353	0.246494	0.355784	0.348894	0.223401	0.545432	0.524281	0.205102	0.2606	0.492545	0.789716	0.244692	0.452476	0.0675114	0.4554	0.844359	0.481822	0.259611	0.100128	0.193781	0.591054	0.25953	0.303	0.490986	0.185077	0.294139	0.0985453	0.068609	0.112241	0.338309	0.200511	0.56999	0.814234	0.110902	0.468044	0.472195	0.470748
0.34162	0.157715	0.0757766	0.482133	0.174999	0.141116	0.620452	0.0553984	0.43575	0.0896404	0.37504	0.125766	0.0909929	0.0702302	0.237291	0.385593	0.40239	0.131665	0.433472	0.361626	0.226516	0.081261	0.385096	0.599377	0.167588	0.445795	0.0867665	0.402327	0.6073	0.21955	0.21433	0.0877144	0.150601	0.600869	0.201483	0.171251	0.238885	0.292832	0.209894	0.0940727	0.0603287	0.118354	0.299586	0.121604	0.584122	0.51774	0.161672	0.505763	0.351163	0.384958
0.37773	0.152159	0.0586859	0.383818	0.178718	0.0983849	0.493816	0.0403569	0.2542	0.0678292	0.301304	0.0718137	0.0780498	0.0945654	0.201339	0.158963	0.311805	0.0840757	0.367703	0.10173	0.0426199	0.127789	0.491168	0.323533	0.138018	0.334519	0.0905209	0.477821	0.732058	0.448888	0.269827	0.10497	0.0846243	0.552646	0.163037	0.300993	0.149776	0.272812	0.196362	0.0742214	0.0553006	0.114687	0.190553	0.138976	0.517553	0.449154	0	0.405754	0.22952	0.303645
0.41384	0.166139	0.0641408	0.370578	0.127353	0.0599615	0.382204	0.0239612	0.219677	0.0575405	0.182393	0.0802973	0.171797	0.0855124	0.202697	0.16313	0.239769	0.0615084	0.256164	0.346739	0.0434563	0.156075	0.350207	0.403286	0.119967	0.264481	0.0196831	0.247116	0.821899	0.180386	0.424944	0.0858516	0.0788416	0.473327	0.131798	0.292425	0.0929857	0.285707	0.135974	0.100512	0.0545617	0.0998089	0.242014	0.199673	0.469592	0.0495269	0.0614617	0.521719	0.0978592	0.148028
0.44995	0.092299	0.0706258	0.287339	0.144179	0.0545023	0.260358	0.0547143	0.26266	0.0506279	0.167815	0.0614236	0.152999	0.104523	0.256638	0.152011	0.183621	0.133703	0.087825	0.236405	0.146748	0.114553	0.190077	0.411712	0.120915	0.1797	0.0192046	0.237485	0.559081	0.243581	0.358067	0.0980612	0.0854226	0.287566	0.131343	0.267141	0.0768881	0.167717	0.109457	0.103732	0.0736359	0.116216	0.055026	0.0728372	0.416016	0.19912	0.133614	0.335779	0.104507	0.091446
0.48606	0.123125	0.0487727	0.250504	0.0311742	0.056103	0.244462	0.0316547	0.199995	0.0558837	0.117065	0.102366	0.047193	0.104526	0.181911	0.0956964	0.214209	0.0730566	0.0828769	0.083081	0.289488	0.237157	0.354993	0.220142	0.141846	0.397644	0.00675863	0.145191	0.390349	0.13974	0.691753	0.0799191	0.0812085	0.298632	0.0732093	0.212911	0.0687358	0.21256	0.0880874	0.0304041	0.0730443	0.101911	0.11209	0.137301	0.245823	0.176769	0.038749	0.297915	0.154559	0.0740886
0.52217	0.143557	0.0408522	0.262171	0.17429	0.0832945	0.169246	0.0179112	0.209285	0.0670603	0.0897172	0.141249	0.132488	0.0798109	0.158983	0.0600736	0.0777784	0.087799	0.135032	0.159754	0.0190971	0.0307811	0.46585	0.287561	0.135102	0.376908	0.0206046	0.0499563	0.459274	0.214209	0.346921	0.0637501	0.0560542	0.442166	0.0681576	0.203596	0.140479	0.250471	0.0882696	0.0252175	0.0331214	0.104052	0.0866156	0.103394	0.227268	0.150406	0	0.3754	0.100705	0.0908255
0.55828	0.091045	0.0315806	0.160449	0.126467	0.056103	0.192039	0.011495	0.213855	0.0694396	0.106381	0.0250757	0.0729202	0.0731564	0.239787	0.0280563	0.148602	0.0792441	0.0673079	0.180179	0.0829224	0.036872	0.258506	0.13854	0.102297	0.167259	0.0244433	0.0167931	0.311704	0.267909	0.453969	0.0368096	0.0577992	0.317966	0.0349624	0.187346	0.163929	0.173729	0.0719508	0.0371998	0.0369652	0.129224	0.12177	0.0715812	0.189943	0.173424	0.221803	0.403483	0.0928025	0.0680831
0.59439	0.098035	0.0574785	0.137115	0.0938754	0.0389407	0.14474	0.0106622	0.157025	0.075352	0.139684	0.062933	0.0723633	0.0738701	0.207317	0.0249662	0.187515	0.0129726	0.0514856	0.206269	0.0100713	0.141397	0.270817	0.0990736	0.100932	0.286599	0.0456584	0.229228	0.13448	0.192253	0.269827	0.072329	0.0820717	0.321968	0.0618208	0.134569	0.144148	0.12879	0.0716318	0.0715391	0.0295722	0.163573	0.0845773	0.100882	0.173846	0.230801	0.0227127	0.312055	0.154779	0.0678726
0.6305	0.0743771	0.0130038	0.065805	0.0832493	0.0326219	0.0650097	0.0315053	0.151421	0.0660382	0.0908804	0.0728115	0.124899	0.0741629	0.153965	0.0234212	0.151742	0.0591226	0.0459565	0.182204	0.0323221	0.0742788	0.29649	0.111407	0.104973	0.337053	0.0215504	0.165363	0.195929	0.195518	0.350637	0.0932451	0.0464659	0.253977	0.0871435	0.140093	0.0872474	0.211818	0.0622203	0.126623	0.0226234	0.154905	0	0.0694879	0.179204	0.0934693	0.0173672	0.259571	0.126869	0.00379501
0.66661	0.135491	0.00985417	0.0652805	0.0710266	0.0519139	0.127508	0.038965	0.0693445	0.0499097	0.0454781	0.0640081	0.210046	0.12505	0.150046	0.0091436	0.103375	0.0943233	0.0770476	0.0990227	0.110627	0.103812	0.204788	0.1371	0.124406	0.348572	0.018992	0.0278375	0.301632	0.298468	0.326719	0.0708666	0.0437184	0.307606	0.104863	0.124893	0.0938685	0.198456	0.053114	0.109097	0.013603	0.0743054	0.0377046	0.0983722	0.174606	0.0807944	0	0.244702	0.154924	0.0115014
0.70272	0.105023	0.014929	0.0748496	0.108577	0.0655932	0.0584768	0.0360516	0.146891	0.0344556	0.045908	0.0716097	0.295193	0.161461	0.193063	0.0103167	0.0774503	0.137643	0.0622517	0.0456009	0.052273	0.142467	0.234892	0.123328	0.143556	0.20366	0.0304789	0.0526864	0.326513	0.118676	0.410546	0.0717449	0.0643524	0.336775	0.0898132	0.0828665	0.175433	0.118329	0.0355742	0.0575884	0.0591456	0.126801	0.0422887	0.0418595	0.124464	0.0553379	0.00667628	0.258177	0.0773521	0.0326482
0.73883	0.0224024	0.0298243	0.0540077	0.0952926	0.0713125	0.127726	0.00085277	0.168832	0.0733499	0.0695763	0.0966806	0.347825	0.156711	0.208316	0.0323962	0.0556177	0.0613443	0.0277343	0.127025	0.0174243	0.182384	0.211973	0.120657	0.0909897	0.268629	0.0310904	0.0845165	0.315599	0.209461	0.259146	0.069123	0.0163364	0.300648	0.0443551	0.102905	0.141058	0.194297	0.0347289	0.0300463	0.0242495	0.106207	0	0.0958603	0.0605277	0.188551	0.112232	0.200829	0.0424148	0.0664931
0.77494	0.0440893	0.0469319	0.033033	0.0719131	0.0462859	0.0983711	0.0264226	0.196186	0.0762492	0.0398265	0.0489907	0.199291	0.109312	0.21654	0.0422001	0.0589178	0.0751828	0.0445766	0.127067	0.0367305	0.0941409	0.339259	0.083453	0.0860804	0.141686	0.0142149	0.065084	0.254325	0.134992	0.199235	0.0570986	0.0617812	0.294541	0.0516679	0.123939	0.11867	0.242751	0.044504	0.031835	0.01316	0.117111	0.0861039	0.0849767	0.0390497	0.318566	0.106898	0.148162	0.0924824	0.0661219
0.81105	0.102874	0.0539404	0.0966098	0.128593	0.0538279	0.182486	0.0319335	0.139097	0.0449114	0.0239086	0.0371225	0.220848	0.107368	0.27928	0.0549981	0.103187	0.0809722	0.0621161	0.136785	0.0564723	0.17916	0.19144	0.102363	0.11177	0.248585	0.0228447	0.0577871	0.255132	0.151905	0.196217	0.0668915	0.0881236	0.247386	0.0392976	0.0663906	0.0901717	0.209175	0.0358187	0.0296886	0.0224749	0.13097	0.0193597	0.0803714	0.0410279	0.368279	0	0.106688	0.0740559	0.0440554
0.84717	0.0465972	0.0162547	0.0956926	0.0844886	0.040869	0.125766	0.0421949	0.128106	0.0393788	0.0448712	0.0725171	0.206201	0.104288	0.243113	0.0146119	0.133141	0.0766807	0.0956684	0.106834	0.0417836	0.177556	0.363541	0.144912	0.168643	0.307333	0.0360332	0.080769	0.469381	0.147751	0.0808095	0.0789676	0.0917251	0.24615	0.0311607	0.0918012	0.112366	0.125212	0.0620867	0.061344	0.0351918	0.163147	0.0606293	0.138976	0.0777708	0.494655	0	0.116776	0.114105	0.0418172
0.88328	0.106279	0.0185937	0.0993624	0.162778	0.0445254	0.0682762	0.0338254	0.108614	0.0692184	0.0790335	0.0578255	0.131496	0.0881198	0.16956	0.0202098	0.109392	0.0436331	0.0724465	0.0447268	0.00399017	0.102921	0.204092	0.0760522	0.237018	0.175553	0.0236491	0.128805	0.205089	0.123125	0.245678	0.0612775	0.0844572	0.267868	0.0680598	0.130134	0.147886	0.132384	0.0649132	0.0634905	0.010055	0.0852086	0.169155	0.104232	0.0486463	0.0138744	0	0.0951648	0.137253	0
0.91939	0.097318	0.0236348	0.0477146	0.100607	0.0360634	0.154946	0.0306162	0.019873	0.0594885	0.0209879	0.0737925	0.143264	0.147374	0.157597	0.0186564	0.0401321	0.0296489	0.0993787	0.0466008	0.111045	0.136034	0.197944	0.0853024	0.221236	0.320464	0.010735	0.0696608	0.21881	0.161102	0.188787	0.0556736	0.076354	0.172922	0.0956919	0.12613	0.0731637	0.204758	0.0688717	0.0525814	0.0150819	0.118415	0.10088	0.0786968	0.0521675	0.153659	0	0.100061	0.117621	0.0138947
0.9555	0.0838765	0.0390114	0.081011	0.080237	0.0193787	0.0740832	0.0384502	0.0421535	0.0584571	0.0557066	0.132072	0.156429	0.110924	0.183819	0.0468925	0.0676917	0.0386337	0.0260155	0.172948	0.0871217	0.114553	0.132583	0.149228	0.149334	0.423216	0.0138375	0.0894493	0.202246	0.2777	0.144666	0.0524748	0.0702186	0.264084	0.0571661	0.126222	0.0946548	0.182482	0.0580359	0.145223	0.0177438	0.128477	0.0881423	0.00293065	0.0669473	0.247061	0.0614617	0.186057	0.0735207	0.0667147
0.99161	0.0595017	0.0324842	0.0873029	0.132136	0.0457893	0.0201794	0.0531145	0.0503693	0.0805098	0.102146	0.095865	0.131116	0.159106	0.115515	0.0671343	0.0504295	0.0726047	0.0402127	0.157737	0.0867035	0.110438	0.127457	0.136484	0.125399	0.369307	0.0120563	0.0835796	0.378768	0.2059	0.13561	0.114732	0.0628487	0.193178	0.059188	0.189174	0.0812608	0.093409	0.0694659	0.138427	0.0165607	0.0975599	0.0280247	0.121604	0.0625998	0.252112	0	0.096212	0.0850048	0
1.02772	0.0437307	0.0125731	0.0618718	0.0761632	0.0714199	0.0596092	0.0317641	0.0770162	0.0360998	0.106482	0.0590658	0.17486	0.0969472	0.0961753	0.0979283	0.0305093	0.0540656	0.163914	0.0952369	0.15262	0.148558	0.151071	0.133401	0.147827	0.467219	0.0103107	0.0726729	0.137147	0.147751	0.107746	0.106027	0.0454077	0.255433	0.0486526	0.167667	0.0697703	0.148761	0.0633789	0.0296886	0.0214403	0.0454232	0.140115	0.11951	0.0636765	0.309916	0.0694799	0.101324	0.103336	0
1.06383	0.0727646	0.033337	0.111685	0.107337	0.0579501	0.0947272	0.0311014	0.0448332	0.0728849	0.0664408	0.0590164	0.113479	0.124323	0.0692091	0.112061	0.068421	0.0829171	0.0880638	0.204018	0.0453381	0.122248	0.167486	0.122917	0.130024	0.231997	0.0281517	0.039906	0.443902	0.302029	0.0733777	0.0525652	0.0359308	0.242425	0.0535397	0.166273	0.0578523	0.151614	0.0415682	0.0999748	0.0387398	0.0268812	0.0300588	0.0786968	0.0610692	0.236532	0.157669	0.15873	0.139729	0.00781718
1.09994	0.0743771	0.0283719	0.0195319	0.105744	0.037665	0.0778578	0.0456134	0.0608023	0.107001	0.0876816	0.0464375	0.208878	0.164414	0.0259606	0.132285	0.0814189	0.0554777	0.0336475	0.101919	0.0799777	0.0834002	0.274239	0.0822196	0.0643786	0.316087	0.0468	0.0292915	0.3382	0.147751	0.0815053	0.0788672	0.0520815	0.282474	0.00483292	0.139491	0.0972757	0.18764	0.0908986	0.0575884	0.00650573	0.0786828	0.0534994	0.0868598	0.011944	0.104012	0	0.0962448	0.113295	0.0473906
1.13605	0.0600387	0.0336748	0.0874335	0.125404	0.0548887	0.043785	0.0599848	0.0166764	0.0900565	0.0762014	0.0341844	0.256006	0.0720631	0.0412374	0.122942	0.0602994	0.0483803	0.114259	0.110738	0.052273	0.121713	0.254061	0.136484	0.116103	0.0751052	0.0268519	0.0143888	0.184594	0.12906	0.107746	0.0624184	0.0716202	0.298037	0.040202	0.0700171	0.143389	0.264253	0.0593549	0.104446	0.0254326	0.0867002	0.180873	0.0791154	0.0743278	0.160576	0.0534435	0.0925012	0.188016	0.0334626
1.17216	0.152698	0.0388594	0.0970036	0.127884	0.0707672	0.0838535	0.0702077	0.0558782	0.0609149	0.102841	0.032471	0.12971	0.0533028	0.0494231	0.115669	0.024452	0.0611483	0.0401159	0.0810634	0.0426199	0.062825	0.15756	0.148406	0.141846	0.161269	0.0124806	0.00606783	0.205755	0.165847	0.0789515	0.11328	0.0763819	0.330231	0.0380823	0.122671	0.176509	0.227873	0.0314425	0.0168112	0.0138988	0.0926797	0.0606293	0.108627	0.0851545	0.328375	0.048098	0.059271	0.102846	0.00289751
1.20827	0.158432	0.0225793	0.096217	0.157109	0.0676859	0.0473709	0.0369044	0.0897071	0.0441104	0.0736981	0.0287993	0.108003	0.0867216	0.0470938	0.0755089	0.0535594	0.0255986	0.0195972	0.157026	0.0100713	0.0343613	0.135323	0.0772857	0.0857171	0.220709	0.0319689	0.0132304	0.30823	0.0777315	0.0989207	0.0495228	0.0585604	0.231138	0.0479409	0.0959034	0.172522	0.10682	0.0432628	0.0935368	0.0122726	0.120992	0.10088	0.0868598	0.0861999	0.375077	0	0.0639024	0.112689	0.0362992
1.24438	0.0720476	0.0378039	0.0996246	0.179959	0.0549438	0.0299062	0.0188867	0.0471864	0.0423658	0.0456045	0.0155556	0.15338	0.0567932	0.0819535	0.0757722	0.0153357	0.0641184	0.101046	0.195103	0.0875399	0.115622	0.255424	0.153749	0.112381	0.191219	0.0294488	0.0897616	0.198842	0.278886	0.203415	0.0382317	0.0494083	0.154526	0.0401042	0.127901	0.171101	0.174874	0.0575712	0.0593771	0.0366707	0.0959444	0.0422887	0.112814	0.1058	0.47597	0.0374071	0.0997376	0.0625119	0.0259945
1.28049	0.0806501	0.0727959	0.0870407	0.195545	0.0265442	0.0474434	0.0787946	0.0637948	0.0630393	0.0602582	0.0182632	0.213252	0.0139692	0.0466232	0.0863285	0.0354949	0.0310892	0.0813631	0.150878	0.0493283	0.0742788	0.188359	0.107501	0.176485	0.166799	0.0320532	0.21318	0.0876294	0.169113	0.146524	0.0781223	0.0184063	0.135566	0.0201819	0.151101	0.142286	0.323168	0.0507659	0.0742214	0	0.0505648	0.0845773	0.0793256	0.0780838	0.398761	0.0788289	0.0468527	0.100035	0.105657
1.3166	0.0405043	0.0275106	0.0870407	0.192535	0.0482603	0.056967	0.0784181	0.0160099	0.0520907	0.0799565	0.0169685	0.238418	0.0783699	0.10374	0.123014	0.0878591	0.0427697	0.11997	0.097262	0.109373	0.0877084	0.241395	0.145528	0.141527	0.267017	0.0253376	0.0569946	0.258923	0.212726	0.154187	0.0893001	0.0428923	0.205526	0.0402368	0.147181	0.0683358	0.321346	0.0460812	0.0634905	0	0.0774124	0.0473845	0.0883243	0.0570879	0.302412	0.16836	0.049029	0.0965488	0.0694183
1.35271	0.083518	0.0449644	0.0280521	0.14294	0.0526588	0.0808339	0.070133	0.0682699	0.0192142	0.03793	0.0729213	0.179122	0.180639	0.106228	0.122367	0.0500365	0.0604906	0.122308	0.0418453	0.0274956	0.0297115	0.335496	0.097429	0.0619417	0.300421	0.0138375	0.106666	0.179856	0.0658647	0.242195	0.037596	0.0169119	0.245167	0.0533761	0.150292	0.0807918	0.312336	0.0897545	0.0862037	0.00236617	0.112284	0.0845773	0.123906	0.0703465	0.308543	0	0.0306323	0.0417646	0.0379114
1.38882	0.0191774	0.0385554	0.0450936	0.210601	0.0413177	0.0577364	0.0781363	0.080308	0.00725945	0.0469195	0.0264669	0.157518	0.109068	0.0919501	0.174366	0.0435436	0.103074	0.0635121	0.0827284	0.0136433	0.0128799	0.215395	0.141007	0.125177	0.106668	0.0279991	0.142005	0.30851	0.305885	0.0770936	0.0484265	0.0407853	0.250508	0.0608757	0.124739	0.114339	0.263173	0.0845888	0.127161	0.0227707	0.0922541	0.0152831	0.100464	0.101227	0.693976	0	0.025694	0.194623	0.0550582
1.42493	0.0580677	0.0488824	0.106179	0.360095	0.0199854	0.121193	0.0795675	0.031843	0.0393467	0.0665798	0.0190161	0.137671	0.0927768	0.160532	0.0592488	0.095375	0.0987569	0.0487581	0.130871	0.0745239	0.0382981	0.172626	0.0707089	0.0858234	0.342351	0.0109906	0.0658093	0.154729	0.194627	0.141648	0.105311	0.0611686	0.203003	0.0574576	0.144002	0.119622	0.332307	0.0600269	0.0890657	0.0257284	0.0658287	0.126866	0.0818359	0.125359	0.255338	0.0106909	0.0409867	0.0679138	0.0191413
1.46104	0.088894	0.10034	0.0865163	0.191648	0.0652953	0.118333	0.0457458	0.0345498	0.080081	0.0370197	0.0218987	0.0976459	0.174459	0.136103	0.120353	0.0426847	0.0918419	0.110211	0.1605	0.082086	0.0785721	0.212996	0.196093	0.137193	0.308255	0.0114561	0.0634016	0.270188	0.317159	0.188554	0.0720893	0.0594421	0.217463	0.0774661	0.134855	0.144024	0.203646	0.0479297	0.0904967	0.0128642	0.0451249	0.0845773	0.0558839	0.103274	0.222804	0	0.0604962	0.116606	0.0185762
1.49715	0.0595017	0.0506641	0.0435204	0.294027	0.0722243	0.0145176	0.0443767	0.0952161	0.0422012	0.0885034	0.0120661	0.21061	0.0152485	0.0960285	0.0417961	0.0202585	0.0857328	0.048416	0.176318	0.0174243	0.0297115	0.0709985	0.170605	0.150645	0.152975	0	0.0335796	0.350939	0.492502	0.11564	0.0574028	0.0371281	0.176551	0	0.167893	0.0689703	0.14507	0.0728698	0.118754	0.0245453	0.0670354	0.0845773	0.0868598	0.156499	0.26656	0.110902	0.0234263	0.100035	0
[truncated: 107 more columns]
