# Supplementary material for: Visualization of endogenous G proteins on endosomes and other organelles
Source: eLife. 2024 Nov 8;13:RP97033. doi: 10.7554/eLife.97033 (PMC11548881; doi:10.7554/eLife.97033)
Supplement: Figure 4—source data 1. [file elife-97033-fig4-data1.xlsx]

## Sheet: 4C
Distance	FM4-64																																													mNG
-1.5	0.338921	0.0794913	0.106337	0.15625	0.0433135	0.256167	0.0607112	0.0283912	0.170807	0.0429293	0.0306958	0.0140086	0.0654897	0.135952	0.0748069	0.0515464	0.0424929	0.0363636	0.117188	0.0482602	0.0352113	0.0621762	0.0380097	0.0547345	0.0544872	0.109044	0.244932	0.0907982	0.0881336	0.112305	0.0478851	0.0459506	0.0787688	0.119325	0.0949367	0.0322878	0.0403587	0.0687893	0.105337	0.188746	0.0759707	0.0797086	0.010876	0.0217725	0.0573477	0.268166	0.0834725	0.0754644	0.10101
-1.46389	0.396983	0.0857965	0.0957118	0.117715	0.0466007	0.147603	0.083209	0.031489	0.13725	0.0654646	0.0478036	0.00542069	0.0883052	0.0744381	0.0951709	0.0574695	0.0334688	0.0636364	0.0809792	0.0347817	0.0364836	0.0596684	0.0340221	0.0699234	0.0488269	0.108356	0.277098	0.074463	0.104159	0.107637	0.0397598	0.0302815	0.0662143	0.133818	0.0954238	0.0313173	0.100518	0.062956	0.0932542	0.144245	0.0508165	0.07581	0.0209133	0.0146173	0.0700932	0.239121	0.118179	0.186376	0.154254
-1.42778	0.424073	0.0920525	0.115868	0.0997754	0.0299142	0.159311	0.0661318	0.0448517	0.184238	0.0632929	0.0726057	0	0.0619635	0.060423	0.0790483	0.0459981	0.0424122	0.0611182	0.10426	0.0489762	0.0486632	0.0586425	0.0480442	0.0700328	0.0692949	0.0944952	0.176078	0.0557315	0.097718	0.112405	0.0319234	0.0444285	0.06635	0.144012	0.0773313	0.0391292	0.0971686	0.0521934	0.0931938	0.159188	0.062309	0.0919603	0.0407735	0.0168586	0.0713835	0.27337	0.119361	0.0996656	0.20202
-1.39167	0.279155	0.0985787	0.155156	0.143311	0.0283036	0.141089	0.0516826	0.0185741	0.162073	0.0492121	0.0728922	0.0239931	0.0509089	0.0467734	0.0661429	0.0382849	0.0042762	0.0940818	0.116094	0.0567107	0.0352113	0.0690985	0.0464686	0.0288396	0.0536859	0.0909942	0.258193	0.041652	0.0756922	0.0790247	0.0327885	0.0415566	0.0758652	0.120459	0.0759147	0.0615018	0.0818251	0.100189	0.112249	0.157607	0.0615971	0.121492	0.0398788	0.0240922	0.0778925	0.147484	0.10214	0.0581564	0.115386
-1.35556	0.321612	0.0601812	0.0874132	0.161777	0.024165	0.16919	0.0504423	0.0222334	0.152915	0.0567778	0.0606821	0.0227983	0.0868633	0.0422236	0.0650676	0.0397376	0.0364264	0.0583818	0.0829271	0.0597388	0.0520387	0.0731088	0.0218106	0.0502408	0.0388077	0.0708557	0.335463	0.0524014	0.0737327	0.104701	0.0535579	0.0370017	0.0592487	0.110664	0.0677881	0.00857011	0.135474	0.0872013	0.128897	0.191838	0.0635464	0.111961	0.0289096	0.00352561	0.0835412	0.287152	0.0827262	0.091579	0.243246
-1.31945	0.193907	0.0484674	0.155295	0.116367	0.0393069	0.177243	0.0698179	0.0433439	0.152211	0.0602525	0.0597954	0.00946552	0.0854898	0.0530514	0.0567085	0.0289597	0.021221	0.101755	0.0875729	0.0492307	0.0535599	0.0747668	0.0347201	0.0493979	0.0577821	0.0568031	0.270976	0.0645375	0.0795512	0.083569	0.0442793	0.040471	0.0556859	0.0981184	0.0803484	0.0166439	0.176562	0.0858491	0.124364	0.191424	0.0562577	0.114961	0.0261323	0.0175328	0.0910538	0.242349	0.102983	0.104005	0.220655
-1.28334	0.341662	0.0522226	0.156771	0.123545	0.0353927	0.176245	0.0265395	0.0432681	0.115753	0.0415657	0.0667531	0.00509828	0.0868633	0.120665	0.0356207	0.0357638	0.0357436	0.0842273	0.10526	0.0507631	0.0265681	0.0709948	0.0438424	0.0628134	0.0527115	0.0588788	0.257041	0.0573948	0.0749511	0.0911094	0.0114421	0.040649	0.0516529	0.0944881	0.0720495	0.0198598	0.143309	0.126706	0.0887725	0.201709	0.0579696	0.107694	0.0188816	0.0169621	0.0804373	0.222249	0.112583	0.117152	0.105726
-1.24723	0.258076	0.0792035	0.147483	0.129658	0.0348713	0.197011	0.0490199	0.0465741	0.137168	0.052202	0.0752524	0.0121086	0.0666219	0.0798973	0.0463436	0.0351359	0.0138725	0.113255	0.0998021	0.0400071	0.0367312	0.0634715	0.0391569	0.047318	0.0547244	0.0595234	0.205463	0.0707587	0.0671982	0.115056	0.00807662	0.0540436	0.0507659	0.0781018	0.0679774	0.0223967	0.169188	0.063467	0.109421	0.173177	0.0633939	0.100339	0.0243336	0.0194267	0.107147	0.200287	0.107518	0.0449876	0.0487551
-1.21112	0.233402	0.0986359	0.0867882	0.133193	0.027934	0.117446	0.0565395	0.0433186	0.144078	0.0966061	0.0614325	0.037231	0.0539408	0.10574	0.044862	0.0282193	0.00243626	0.0803909	0.109812	0.0336454	0.0634753	0.0763316	0.0578162	0.063618	0.0449679	0.0386735	0.287125	0.0681807	0.0387456	0.102414	0.0535579	0.0670706	0.0677848	0.0987604	0.0576026	0.0505184	0.135312	0.0792925	0.0381166	0.199915	0.0474434	0.0910836	0.0526188	0.0185143	0.0887742	0.201367	0.0955309	0.0553576	0.109833
-1.17501	0.171822	0.0974626	0.112622	0.117656	0.0149703	0.149761	0.0474762	0.0465615	0.113477	0.0966061	0.0416508	0.0357276	0.086	0.0874502	0.0481496	0.026523	0.0343145	0.0659364	0.0961979	0.0351425	0.0396831	0.06143	0.0478922	0.0744116	0.0400577	0.0351385	0.215476	0.067884	0.054623	0.0802643	0.0386058	0.0690465	0.0561464	0.0885556	0.0480484	0.036786	0.146983	0.0686557	0.0807472	0.122151	0.0571902	0.086701	0.0321342	0.0232351	0.0893477	0.144872	0.152765	0.0387678	0.0825265
-1.1389	0.149735	0.0950779	0.150625	0.118838	0.0325875	0.142632	0.0508413	0.0556215	0.0935637	0.0721414	0.0384175	0.0319121	0.0418724	0.0730725	0.045166	0.0165417	0.0377266	0.110627	0.0885417	0.0401559	0.025189	0.0690363	0.040622	0.0798741	0.0483718	0.0408281	0.200814	0.0495719	0.0414793	0.0851458	0.0464429	0.0604423	0.0470286	0.062363	0.0526626	0.0485148	0.106083	0.0908805	0.0653834	0.136652	0.055749	0.0807365	0.032973	0.0212633	0.0768459	0.347491	0.0995376	0.0162585	0.189545
-1.10279	0.271466	0.0686248	0.121892	0.0801855	0.026066	0.169006	0.0526366	0.0602208	0.11695	0.0626566	0.0644338	0.0129741	0.0740228	0.0761662	0.0474633	0.0169353	0.019796	0.0743727	0.103073	0.03952	0.0566526	0.0703212	0.0553213	0.0637	0.0515962	0.0465285	0.20026	0.069096	0.072612	0.0792481	0.011154	0.0529753	0.0582356	0.0720421	0.064694	0.0705701	0.110838	0.0541116	0.0804129	0.184231	0.0539353	0.0782441	0.02863	0.00945236	0.0581864	0.418031	0.0678047	0.00211455	0.133564
-1.06668	0.202224	0.0612703	0.118455	0.0717676	0.0187393	0.153385	0.0610581	0.0355521	0.0955435	0.0793838	0.0634789	0.00933793	0.0822005	0.102009	0.0377288	0.0335895	0.0116105	0.115773	0.0877292	0.0296182	0.0645364	0.0553471	0.049848	0.0502189	0.0596154	0.0517402	0.214314	0.0713629	0.0950654	0.0783737	0.00519234	0.054687	0.0347649	0.0972219	0.0696709	0.101596	0.074261	0.0585613	0.0927303	0.152308	0.0498672	0.0828378	0.0314166	0.00288576	0.0391254	0.298824	0.137471	0.0673529	0.0984242
-1.03057	0.135586	0.0680382	0.130677	0.0850098	0.0221056	0.141262	0.0604076	0.0424353	0.129295	0.0855758	0.0665894	0.0236465	0.0455467	0.122121	0.0662085	0.0357638	0.025534	0.0925545	0.0742396	0.0288127	0.0576068	0.0542798	0.0365584	0.0369732	0.0581795	0.0573637	0.213159	0.070385	0.0955641	0.0697852	0.0558659	0.0703791	0.0512021	0.121057	0.074066	0.0896273	0.0959803	0.099544	0.101125	0.181766	0.0569696	0.0973742	0.0343896	0.00552613	0.0420502	0.313183	0.0548798	0.0963266	0.201412
-0.99446	0.120659	0.0846534	0.146632	0.0929492	0.0288977	0.12997	0.074588	0.0427319	0.152675	0.0567576	0.0629059	0.036169	0.0315011	0.0755287	0.046028	0.0329709	0.0148144	0.0910182	0.0833333	0.0499528	0.0701045	0.0443005	0.0479751	0.0575807	0.0504808	0.0422976	0.227071	0.0863049	0.0799097	0.0833437	0.03	0.0610109	0.0524867	0.0912396	0.0468426	0.0369004	0.0748018	0.0681682	0.0872303	0.162578	0.0542577	0.0818328	0.0539981	0.0122941	0.0280645	0.252806	0.0309315	0.118023	0.141475
-0.95835	0.141557	0.0819237	0.155955	0.101953	0.0458878	0.177135	0.0621075	0.0492051	0.100087	0.0640404	0.0673261	0.0441052	0.0361572	0.0762568	0.0564035	0.0294939	0.0253428	0.113582	0.0856563	0.0502736	0.0737277	0.0625389	0.0361023	0.0298905	0.04175	0.050195	0.256892	0.0586797	0.0687668	0.0670443	0.034087	0.0447961	0.0486427	0.0748755	0.0609631	0.0450295	0.0704251	0.0684434	0.114094	0.157863	0.0394941	0.0635253	0.0116589	0.0170287	0.0330681	0.307107	0.176459	0.0644164	0.163457
-0.92224	0.18316	0.0697901	0.123125	0.101543	0.0291155	0.191044	0.0469731	0.0501325	0.0875668	0.0459596	0.0605593	0.0491983	0.055164	0.158882	0.0579151	0.0307216	0.0151997	0.112482	0.101344	0.0426311	0.0826725	0.0773161	0.0469247	0.0529776	0.0338654	0.0487364	0.167331	0.0702746	0.0546203	0.070554	0.0352889	0.0215164	0.0627242	0.0753237	0.0559598	0.049214	0.052704	0.0629796	0.129504	0.186311	0.0424266	0.060636	0.045713	0.011377	0.0358996	0.191744	0.151229	0.0781532	0.0984242
-0.88613	0.112184	0.0971717	0.126597	0.0796582	0.0496106	0.200224	0.0338942	0.0538549	0.170829	0.0530404	0.109304	0.0179655	0.0699818	0.147417	0.0520019	0.0261856	0.00810623	0.1644	0.106271	0.0396611	0.0899554	0.0657098	0.0505736	0.0504926	0.0354936	0.0343938	0.18247	0.0635128	0.0785447	0.0665619	0.0226927	0.0365882	0.0440572	0.074881	0.0654265	0.0778469	0.0358744	0.0758255	0.156551	0.174672	0.0492065	0.0743843	0.0483784	0.0184703	0.0287957	0.299433	0.0323439	0.0963746	0.030197
-0.85002	0.132399	0.0446614	0.176128	0.0776562	0.0458086	0.167019	0.0245013	0.0423722	0.100408	0.0796566	0.0361528	0.0126569	0.081098	0.0732538	0.0535791	0.0119119	0.00506799	0.117309	0.09375	0.0271058	0.0763791	0.0176373	0.0589426	0.0293487	0.0375897	0.0484471	0.196611	0.075443	0.106667	0.0589316	0.0371157	0.0465997	0.0490839	0.0734864	0.0510248	0.0398616	0.0719112	0.0697877	0.183015	0.196225	0.0557321	0.0716748	0.0619105	0.0222915	0.0487599	0.100785	0.0462738	0.103203	0.0646528
-0.81391	0.126612	0.100307	0.168177	0.0588867	0.0514389	0.213222	0.032758	0.0528391	0.0954053	0.0759596	0.0787585	0.0102828	0.0590683	0.067429	0.0396766	0.0126242	0.0184858	0.132973	0.0859687	0.0479671	0.0977676	0.033886	0.052405	0.0397811	0.0342179	0.0524208	0.206348	0.064193	0.0866267	0.0679961	0.0241828	0.0408558	0.0391517	0.131832	0.0491519	0.0526771	0.0655354	0.0459355	0.160926	0.180442	0.0425791	0.0693902	0.0506617	0.0169708	0.0709677	0.0890484	0.0517462	0.0608607	0.0650328
-0.7778	0.134968	0.134558	0.134462	0.104131	0.0469373	0.236619	0.0620989	0.044612	0.124921	0.0269798	0.03	0.0270741	0.100679	0.0811692	0.0484344	0.00820993	0.0376912	0.126291	0.0768438	0.0541783	0.107614	0.114881	0.0348721	0.0521784	0.0355641	0.0621155	0.222385	0.0521068	0.0600866	0.0658047	0.0173081	0.0440609	0.0498546	0.0951799	0.0312972	0.0200572	0.0465175	0.0447956	0.17251	0.212635	0.050359	0.0684831	0.0346505	0.0113489	0.0796774	0.104218	0.0230835	0.0720836	0.0515694
-0.74169	0.131606	0.0939475	0.186528	0.0764746	0.0345478	0.256	0.0471986	0.0595773	0.124207	0.0620606	0.0577899	0.0401431	0.0820797	0.139864	0.0433234	0.0129335	0.0448824	0.131655	0.07825	0.0453408	0.0925892	0.11087	0.0525156	0.0464368	0.0260064	0.0428563	0.232405	0.0745442	0.0661733	0.0711829	0.0189904	0.042355	0.0446583	0.10855	0.0540182	0.0362583	0.0269058	0.0401572	0.138292	0.220997	0.0626308	0.0817255	0.0493197	0.0128571	0.0798208	0.0219343	0.0848063	0.0849907	0.0940126
-0.70557	0.175327	0.0642909	0.168385	0.0938867	0.0582376	0.220861	0.0360451	0.0422776	0.13297	0.110232	0.0575307	0.0264914	0.0869089	0.175535	0.0561332	0.0400375	0.0281105	0.121909	0.0839583	0.0428275	0.060365	0.0964145	0.054264	0.0516694	0.0369039	0.0455914	0.203946	0.0737931	0.0860857	0.0622533	0.0238468	0.0419816	0.0617111	0.107244	0.0543533	0.0456568	0.0544063	0.0213994	0.11549	0.227607	0.0668177	0.0795152	0.059329	0.0108509	0.072552	0.121965	0.153194	0.0998777	0.126263
-0.66946	0.0820671	0.10834	0.147361	0.1296	0.0550231	0.163602	0.0490546	0.0393375	0.140851	0.061404	0.0742974	0.0301172	0.0918793	0.129127	0.0356506	0.0249578	0.0274787	0.166264	0.0729167	0.0380134	0.047108	0.129264	0.0602419	0.0606295	0.0542885	0.0537646	0.174287	0.0542264	0.0771235	0.0430475	0.0146153	0.0446008	0.0463064	0.115329	0.0539439	0.0690221	0.03193	0.0440487	0.11511	0.217707	0.0434266	0.0790566	0.0655638	0.0114252	0.0654265	0.107208	0.0611369	0.0474226	0.0252525
-0.63335	0.0874606	0.0678378	0.191719	0.0810644	0.05767	0.166934	0.0588899	0.0526435	0.160815	0.0885758	0.0865075	0.0796793	0.0787904	0.199196	0.0370589	0.0107779	0.0353286	0.154545	0.0675521	0.0340257	0.0862254	0.152549	0.0737388	0.0673618	0.0399551	0.0573117	0.0993446	0.0415154	0.0650682	0.0494382	0.0457694	0.0505801	0.0304508	0.082518	0.0426329	0.0618303	0.0422771	0.031989	0.142437	0.143974	0.0509184	0.0606529	0.052302	0.0223642	0.0833047	0.19646	0.191786	0.0781827	0.108616
-0.59724	0.0797289	0.0943688	0.171563	0.101123	0.0704753	0.192533	0.0528101	0.0413565	0.155913	0.130919	0.0662347	0.0577379	0.097369	0.149692	0.0411496	0.0229803	0.0237337	0.189482	0.085125	0.0400033	0.0938967	0.178984	0.0722391	0.0694636	0.0505897	0.0754048	0.112611	0.0293475	0.0992673	0.0526927	0.0406736	0.0727341	0.0519001	0.0660376	0.0493897	0.0729686	0.0627803	0.0347877	0.142681	0.188889	0.0780726	0.0669096	0.069329	0.0160246	0.084086	0.169021	0.0576611	0.0591997	0.198673
-0.56113	0.114953	0.0986805	0.144549	0.129658	0.0827459	0.152114	0.047294	0.038082	0.183776	0.149929	0.0851842	0.0516569	0.0736606	0.116568	0.0452761	0.0300281	0.0209008	0.212373	0.110854	0.0263875	0.0877805	0.152746	0.0650035	0.0937274	0.0432115	0.0744509	0.145338	0.0460821	0.119366	0.0679538	0.0197119	0.0755141	0.0448134	0.074145	0.0424887	0.0821661	0.0206924	0.0390566	0.129647	0.239145	0.081937	0.0681157	0.110811	0.020625	0.101584	0.164145	0.114705	0.0619783	0.0952298
-0.52502	0.0733994	0.134593	0.167604	0.174668	0.0739208	0.185391	0.053235	0.0505741	0.182064	0.148596	0.137626	0.0618069	0.028082	0.125577	0.0426824	0.0457545	0.0231785	0.257936	0.101062	0.0401559	0.114419	0.235803	0.0854112	0.109102	0.0347436	0.0523438	0.149814	0.0537551	0.12144	0.0730417	0.0157694	0.0766973	0.0587736	0.0947593	0.0504023	0.0559797	0.0408717	0.0369733	0.134617	0.281382	0.0855982	0.0711588	0.0729823	0.0257157	0.0855125	0.149872	0.107242	0.0387802	0.0658699
-0.48891	0.152461	0.179227	0.207656	0.259316	0.0820792	0.189034	0.0571032	0.0562208	0.185384	0.197424	0.161241	0.0433569	0.0605809	0.095003	0.0359865	0.0383224	0.0258499	0.307336	0.0841146	0.0602569	0.178354	0.204839	0.0985902	0.129387	0.0320641	0.0749859	0.176091	0.0715986	0.142309	0.0626999	0.0237502	0.118828	0.0450315	0.127427	0.0464997	0.0924502	0.064644	0.038522	0.0632191	0.224459	0.112871	0.0688792	0.101929	0.010311	0.174753	0.090519	0.108332	0.0561842	0.188025
-0.4528	0.121259	0.220269	0.307396	0.313857	0.0855182	0.232729	0.0630963	0.0676025	0.303899	0.229444	0.262619	0.0547948	0.104565	0.0906344	0.0337066	0.029344	0.0121742	0.347209	0.0994896	0.0624137	0.188377	0.185979	0.0960194	0.147772	0.0593333	0.0962155	0.212831	0.0716057	0.146291	0.0607025	0.0197598	0.175686	0.0368444	0.110232	0.0589818	0.0989557	0.0363605	0.0604009	0.125291	0.205228	0.128042	0.0826613	0.10849	0.0149985	0.12405	0.061	0.0730634	0.0847988	0.151515
-0.41669	0.248443	0.177062	0.347274	0.298965	0.0981848	0.245892	0.0686643	0.0472177	0.284561	0.181737	0.302033	0.0447517	0.116458	0.151604	0.0299652	0.0306186	0.0438003	0.391127	0.134	0.094144	0.185655	0.277016	0.0851279	0.166284	0.0680705	0.0795901	0.23924	0.0761206	0.205483	0.0406986	0.0239425	0.22259	0.0379108	0.126419	0.0657397	0.135203	0.0714789	0.0593868	0.138537	0.185057	0.182655	0.0978953	0.164082	0.0192889	0.15405	0.0641384	0.136663	0.138731	0.0252525
-0.38058	0.239294	0.282579	0.457743	0.427393	0.106178	0.22585	0.08098	0.0666751	0.264068	0.19596	0.340027	0.0819466	0.0883713	0.151876	0.0434151	0.027329	0.119625	0.446109	0.181885	0.0790901	0.219664	0.251492	0.115812	0.175988	0.0561026	0.0781386	0.230483	0.0837957	0.204109	0.0491966	0.0229809	0.334796	0.060824	0.126763	0.0578591	0.101557	0.0358744	0.0633884	0.150716	0.219259	0.183469	0.096772	0.147176	0.0294293	0.189835	0.123709	0.186022	0.0679985	0.114169
-0.34447	0.270461	0.325294	0.44816	0.510166	0.132878	0.343951	0.108586	0.127066	0.313463	0.194838	0.466862	0.114762	0.125046	0.162523	0.0360347	0.0538332	0.0902408	0.508545	0.244135	0.101285	0.307656	0.274736	0.132516	0.19879	0.120788	0.05561	0.310294	0.127067	0.242648	0.0556452	0.013846	0.425583	0.060984	0.202501	0.0621101	0.0695443	0.0879031	0.1232	0.202302	0.282208	0.208182	0.105662	0.214157	0.046104	0.232824	0.0505121	0.12089	0.152844	0.0984242
-0.30836	0.44865	0.431335	0.653472	0.471338	0.188185	0.552645	0.164389	0.207047	0.409927	0.206212	0.543165	0.151514	0.142977	0.200196	0.0787046	0.0738238	0.130497	0.635709	0.320063	0.112117	0.411311	0.368881	0.150249	0.213317	0.180154	0.0675054	0.569588	0.154762	0.263828	0.0790963	0.0558659	0.515491	0.0717111	0.234992	0.0944353	0.0886753	0.0242852	0.142673	0.263216	0.311368	0.260456	0.191367	0.292144	0.0549283	0.240509	0.270706	0.0781853	0.204554	0.0883838
-0.27225	0.521615	0.62545	0.837361	0.540752	0.273716	0.598583	0.218057	0.223962	0.466371	0.29297	0.571296	0.123784	0.261588	0.324136	0.124541	0.0832146	0.230344	0.804055	0.414594	0.108605	0.441626	0.465824	0.244582	0.275293	0.264397	0.102715	0.739236	0.192926	0.38109	0.104865	0.0478851	0.467122	0.119438	0.307676	0.0991915	0.141188	0.0563776	0.186612	0.325751	0.361097	0.300324	0.145427	0.385974	0.0446814	0.280466	0.113927	0.10984	0.230006	0.12033
-0.23614	0.6223	0.901153	1.03399	0.531113	0.325776	0.710592	0.32791	0.420423	0.623194	0.34696	0.757394	0.252502	0.435888	0.433698	0.171812	0.190862	0.328646	0.968564	0.591052	0.117301	0.486365	0.46514	0.306966	0.312605	0.396288	0.138521	0.94501	0.244835	0.467455	0.162015	0.0726448	0.500839	0.144576	0.389519	0.113224	0.186976	0.135394	0.230951	0.468553	0.594046	0.374904	0.184361	0.516468	0.0840379	0.340452	0.116599	0.271639	0.258311	0.193273
-0.20003	1.24789	1.0574	1.575	0.612998	0.351736	0.869852	0.411934	0.536593	0.820155	0.455657	0.975648	0.313526	0.57954	0.546172	0.298451	0.307488	0.401415	1.07437	0.815823	0.195459	0.636277	0.668155	0.376911	0.396065	0.453006	0.162216	1.41604	0.256686	0.560904	0.231783	0.0985587	0.580724	0.223742	0.540426	0.13977	0.155122	0.170404	0.394355	0.512695	0.736752	0.419144	0.287489	0.677903	0.145506	0.457749	0.29064	0.309314	0.244777	0.323415
-0.16392	1.92904	1.06431	1.89892	0.927676	0.480878	0.823877	0.563955	0.633508	0.919907	0.631859	1.18716	0.357038	0.792872	0.599498	0.345246	0.545764	0.567953	1.3598	1.28234	0.227757	0.795683	0.87487	0.460166	0.527482	0.504545	0.204448	1.79616	0.334896	0.616522	0.349454	0.146396	0.612355	0.307862	0.683951	0.144818	0.202574	0.286996	0.476313	0.588861	1.05933	0.428772	0.366836	0.874613	0.166505	0.620602	0.417329	0.242688	0.221675	0.226664
-0.12781	2.57183	1.1322	1.98007	1.06774	0.555267	1.11801	0.699306	0.788189	1.05331	0.705919	1.30651	0.435022	1.0476	0.758199	0.497162	0.709597	0.817987	1.47065	1.86741	0.263198	0.888678	0.96572	0.617754	0.604663	0.636244	0.283974	2.03555	0.376735	0.597944	0.41476	0.143175	0.657714	0.401168	0.854748	0.209497	0.325114	0.407261	0.60081	0.781739	1.64842	0.456113	0.465949	1.0915	0.168941	0.747849	0.889958	0.268182	0.355076	0.32372
-0.0917	2.87923	1.35714	2.50443	1.44755	0.63002	1.3278	0.671865	0.900688	1.10483	0.860222	1.57166	0.448771	1.31132	1.39191	0.716939	0.818013	0.962258	1.66867	2.39445	0.334492	0.910914	0.998124	0.683276	0.637707	0.728929	0.36694	2.08192	0.412005	0.639149	0.480017	0.163415	0.625801	0.494464	0.980299	0.24802	0.408098	0.541656	0.638632	0.840999	2.13744	0.479775	0.551937	1.27337	0.224429	0.895556	0.486419	0.207846	0.520642	0.379852
-0.05559	2.9466	1.40277	2.86941	1.37896	0.708667	1.57445	0.743556	1.07458	1.25832	1.07965	1.70261	0.773781	1.29271	1.38463	0.859453	1.06502	0.952101	1.63242	2.65402	0.385784	0.952472	1.06925	0.810014	0.677406	0.744615	0.399201	2.15797	0.446619	0.573873	0.520388	0.230098	0.562206	0.525637	0.995872	0.261537	0.33612	0.556054	0.70408	0.879428	2.78519	0.521591	0.635348	1.06586	0.226755	0.943756	0.793439	0.216659	0.517467	0.328283
-0.01948	2.82393	1.36248	2.74017	1.45625	0.734409	1.62985	1.07656	1.14233	1.59355	1.24724	1.66697	0.841009	1.45745	1.60485	0.952947	1.01479	1.21233	1.56298	2.65625	0.381007	1.11964	1.1533	0.843511	0.734888	0.778551	0.438843	2.06692	0.462035	0.563586	0.4955	0.22731	0.5361	0.565041	1.06926	0.289424	0.404258	0.64763	0.796407	0.894765	2.96828	0.443824	0.673712	1.57311	0.224773	1.06232	0.810114	0.196726	0.446854	0.249787
0.01663	2.91218	1.32785	2.3575	1.37425	0.780673	1.63808	0.993556	0.998069	1.50457	1.28788	1.69087	0.759995	1.37871	1.74899	0.958695	1.1901	1.16779	1.63406	2.65625	0.438047	1.11741	1.08319	0.916938	0.795178	0.753571	0.49124	1.86449	0.464294	0.574546	0.494868	0.279907	0.532447	0.57254	1.00135	0.30244	0.366384	0.602787	0.835865	0.862104	3.03581	0.457876	0.602607	1.3092	0.234267	1.12156	0.513391	0.123324	0.264966	0.456827
0.05274	2.64959	1.20503	2.47443	1.26288	0.729155	1.6349	0.808187	0.836	1.41882	1.24101	1.65314	0.795083	1.33691	1.80204	0.773548	1.04753	0.922748	1.39584	2.42925	0.349707	1.04193	1.20872	0.876586	0.811773	0.683321	0.401145	1.76792	0.472187	0.534023	0.485316	0.24832	0.528621	0.539084	0.987161	0.29907	0.409483	0.729239	0.861604	0.836066	3.13774	0.467384	0.529753	1.36615	0.264647	0.970065	0.644204	0.180506	0.445613	0.265152
0.08885	2.19878	1.2572	2.15151	1.06457	0.594554	1.63367	0.750789	0.746233	1.55456	1.13151	1.4557	0.56024	1.29996	1.78639	0.645633	0.779485	0.90322	1.50165	2.10991	0.324372	1.04778	0.851948	0.677913	0.782666	0.664615	0.390421	1.5644	0.521059	0.448234	0.377936	0.265387	0.515491	0.436035	0.780227	0.228092	0.371675	0.54306	0.784528	0.628035	2.68024	0.477334	0.509524	1.31238	0.283926	0.981125	0.562343	0.244923	0.329503	0.218602
0.12496	1.73267	1.19051	1.97545	0.721064	0.495228	1.71131	0.586288	0.604278	1.35332	0.843515	1.18179	0.584409	1.22301	1.85182	0.625588	0.534864	1.0009	1.43417	1.71699	0.268696	0.962441	0.664446	0.600691	0.70977	0.573603	0.277289	1.1388	0.497919	0.386177	0.320489	0.227935	0.448805	0.371677	0.609546	0.227347	0.231502	0.372413	0.656101	0.465782	2.21583	0.429416	0.425794	1.13207	0.270902	0.911333	0.291972	0.18726	0.281751	0.178289
0.16107	1.18355	1.00868	1.66811	0.566172	0.427584	1.10657	0.42399	0.451722	1.07679	0.601283	0.757981	0.350943	0.954656	1.35642	0.504359	0.392118	0.761306	1.31293	1.31429	0.241893	0.873264	0.500425	0.48358	0.636782	0.487442	0.229259	1.18675	0.418666	0.297607	0.22936	0.192887	0.453228	0.315797	0.494256	0.171864	0.181956	0.243071	0.544858	0.498442	1.60298	0.350564	0.388474	0.836132	0.267576	0.767821	0.336003	0.164451	0.254703	0.190611
0.19718	0.768023	0.860644	1.34642	0.356914	0.3333	1.11724	0.325499	0.270839	0.844057	0.47102	0.576739	0.304931	0.848686	1.12783	0.383458	0.315464	0.706044	1.35203	1.16233	0.189799	0.702475	0.30513	0.493573	0.599239	0.431237	0.17784	0.990588	0.380926	0.235462	0.191625	0.193512	0.422441	0.254081	0.331776	0.142925	0.121723	0.254174	0.462146	0.34616	0.969986	0.297069	0.292332	0.767316	0.214892	0.606875	0.181536	0.133232	0.248828	0.105497
0.23329	0.576569	0.787676	1.25196	0.185547	0.286521	1.04152	0.216765	0.201041	0.625599	0.381051	0.366617	0.166734	0.835091	0.904707	0.382542	0.170375	0.659846	1.09419	1.05798	0.148083	0.523308	0.218238	0.381424	0.513235	0.409583	0.141282	0.696264	0.292619	0.159939	0.14179	0.16279	0.400821	0.158638	0.257382	0.119494	0.112714	0.165784	0.379733	0.244983	0.619715	0.222098	0.218155	0.577493	0.176813	0.559907	0.271163	0.173316	0.279735	0.0654129
0.2694	0.402811	0.655394	0.90191	0.142842	0.198832	0.82338	0.148534	0.132637	0.446943	0.260677	0.211432	0.137072	0.640528	0.666656	0.196097	0.122933	0.507313	1.01862	0.93101	0.182986	0.409702	0.141409	0.304921	0.401221	0.255378	0.128439	0.565003	0.217905	0.129738	0.100051	0.148895	0.414469	0.164891	0.190343	0.124166	0.101399	0.147712	0.297925	0.176346	0.34406	0.165891	0.177318	0.621985	0.124227	0.442294	0.275097	0.164531	0.171525	0.0749975
0.30551	0.23686	0.513774	0.705486	0.0976562	0.126521	0.714271	0.110147	0.144208	0.335576	0.231485	0.169932	0.1106	0.444057	0.461725	0.143935	0.0913121	0.344647	0.850164	0.79876	0.1291	0.289344	0.0737202	0.252129	0.344899	0.240654	0.101085	0.444395	0.176667	0.113637	0.0782096	0.118655	0.389173	0.163354	0.15663	0.114992	0.0708192	0.0857964	0.243263	0.130553	0.306282	0.127025	0.149394	0.451379	0.0857895	0.362595	0.313661	0.167694	0.226062	0.0631313
0.34162	0.156458	0.375016	0.534497	0.0631836	0.127175	0.592871	0.102914	0.0825741	0.32627	0.243707	0.162974	0.0610655	0.299991	0.338332	0.128491	0.0869634	0.303674	0.6839	0.641719	0.0933322	0.194192	0.0961762	0.161894	0.265134	0.185019	0.108168	0.342889	0.137368	0.05227	0.0734603	0.108607	0.332608	0.148682	0.121544	0.0816896	0.0939963	0.117483	0.192138	0.133829	0.208447	0.100514	0.140619	0.464203	0.0686967	0.288681	0.210287	0.188429	0.405293	0.126263
0.37773	0.151796	0.25065	0.400799	0.0861231	0.119822	0.49856	0.079948	0.0622524	0.24993	0.238677	0.143247	0.0697052	0.207367	0.325592	0.102798	0.0574039	0.221715	0.541727	0.473677	0.0930024	0.134888	0.0797409	0.139565	0.218396	0.199564	0.0856459	0.364101	0.118346	0.0598175	0.0688561	0.0624046	0.266134	0.112307	0.0974543	0.0998586	0.0954244	0.0532987	0.166187	0.148529	0.225556	0.0983619	0.120304	0.408574	0.0619385	0.250222	0.0455225	0.117376	0.192077	0.0503535
0.41384	0.168633	0.179809	0.421424	0.0500684	0.0922178	0.420602	0.0535299	0.0831672	0.140407	0.309697	0.139986	0.042431	0.127415	0.331964	0.0974035	0.0497751	0.191829	0.470973	0.375563	0.0867865	0.111502	0.0639378	0.102004	0.215955	0.154237	0.0696036	0.306291	0.0887028	0.107371	0.0790312	0.0641836	0.250454	0.0923364	0.0925623	0.0680308	0.0370849	0.0627803	0.150244	0.134056	0.158647	0.0998199	0.0879561	0.368378	0.0400271	0.177319	0.0468754	0.0802771	0.170943	0.0600884
0.44995	0.152741	0.133127	0.288854	0.0488281	0.0602178	0.343417	0.0816826	0.0575268	0.163932	0.207404	0.101583	0.0591362	0.101563	0.227314	0.0902693	0.0284911	0.134687	0.331655	0.272969	0.0722941	0.0759026	0.0481244	0.0862405	0.18769	0.155679	0.0547139	0.222753	0.058962	0.0859152	0.0407506	0.0321157	0.209242	0.0912748	0.101439	0.052743	0.0622823	0.0191525	0.145346	0.106999	0.200214	0.080242	0.0879687	0.236477	0.0346813	0.162	0.0420242	0.0731937	0.129562	0.0298157
0.48606	0.126787	0.0806789	0.266806	0.0777734	0.0409307	0.213905	0.0718821	0.0585867	0.213292	0.182636	0.114911	0.0512724	0.0554237	0.19419	0.0476988	0.0464105	0.118601	0.254982	0.217969	0.036449	0.0548145	0.0434197	0.0659917	0.163383	0.0811346	0.0513547	0.168459	0.0796771	0.0837733	0.0468086	0.0160575	0.124446	0.0888415	0.0863641	0.0528156	0.0916624	0.0204224	0.0872877	0.0957683	0.175014	0.0838188	0.0696698	0.175657	0.0319887	0.0653692	0.11372	0.126195	0.109289	0.0263939
0.52217	0.184592	0.0931431	0.219288	0.0289453	0.0515446	0.251613	0.0724978	0.054347	0.152354	0.186626	0.115348	0.0608638	0.0533212	0.139955	0.0494189	0.032671	0.071255	0.185327	0.180156	0.0402569	0.0800563	0.0370052	0.0638839	0.174067	0.0824872	0.0539089	0.126311	0.0628311	0.0865668	0.0606738	0.0242306	0.104118	0.0754678	0.0690205	0.0564585	0.101673	0.0438439	0.0903538	0.0613876	0.221923	0.0679871	0.0731647	0.20164	0.0252485	0.0791685	0.0893114	0.0862387	0.0934984	0.0626755
0.55828	0.190872	0.10407	0.104792	0.0479492	0.0297822	0.241406	0.0760017	0.0425363	0.16822	0.172616	0.0931242	0.0647793	0.0781139	0.104831	0.0587239	0.028463	0.0466544	0.219273	0.156188	0.0336911	0.081223	0.0691814	0.0457913	0.20162	0.07725	0.0596459	0.129892	0.0642813	0.0700405	0.0552344	0.0237023	0.0928375	0.103233	0.0953514	0.0441002	0.0495406	0.0144798	0.0603145	0.0571812	0.132521	0.0472234	0.0757534	0.177372	0.018228	0.0914337	0.254433	0.051015	0.0876517	0.0803977
0.59439	0.171875	0.118949	0.105764	0.0642383	0.0367063	0.231378	0.0586297	0.0436214	0.130376	0.190707	0.106876	0.0963741	0.107572	0.143595	0.0496969	0.0405061	0.0514065	0.162209	0.129865	0.0385334	0.0790657	0.056829	0.0387146	0.194877	0.0753333	0.0552438	0.0968074	0.0460057	0.0919714	0.067207	0.0163464	0.0681045	0.0560349	0.075036	0.0420259	0.0442731	0.0142359	0.028239	0.0760253	0.138789	0.0501384	0.0614147	0.13178	0.0112049	0.0516774	0.286204	0.03701	0.0760604	0.0576553
0.6305	0.136525	0.0784706	0.0926736	0.0272949	0.0445149	0.160121	0.0583001	0.0431609	0.162902	0.121646	0.109141	0.0931138	0.101456	0.194372	0.0550946	0.0322305	0.0400099	0.139536	0.109063	0.0300834	0.0630516	0.0340311	0.0309606	0.216382	0.0693077	0.0554772	0.114071	0.0406884	0.104248	0.0518841	0.00903831	0.06166	0.065303	0.0732485	0.0656516	0.065762	0.0269058	0.0534198	0.0407809	0.142365	0.0839375	0.0509856	0.100513	0.0162874	0.0591541	0.0632387	0.00915192	0.108636	0.0606212
0.66661	0.131618	0.0798156	0.0843576	0.0415332	0.0355974	0.163877	0.0546487	0.0284038	0.119564	0.121697	0.144202	0.107864	0.125139	0.207112	0.0437008	0.0424274	0.0374235	0.139318	0.11549	0.0295481	0.0410094	0.0872435	0.0311196	0.240263	0.0628397	0.0453797	0.145088	0.0444153	0.128303	0.0638405	0.0159617	0.0748018	0.0516917	0.0739292	0.0741877	0.0587528	0.0179372	0.0514544	0.0557065	0.124858	0.0523928	0.065576	0.0934762	0.0305087	0.049785	0.14727	0.11587	0.0722059	0.0724103
0.70272	0.177749	0.0818919	0.105642	0.0600684	0.0430495	0.197552	0.0516392	0.0333691	0.149972	0.065899	0.102442	0.0941983	0.0501093	0.114659	0.0645396	0.0567947	0.0329221	0.123545	0.134167	0.0223646	0.0456045	0.06857	0.0359019	0.225665	0.0887628	0.0392611	0.0696858	0.0443316	0.134917	0.0507383	0.00326895	0.059506	0.0666457	0.0760985	0.0626995	0.0864779	0.0240152	0.0424921	0.0662711	0.147236	0.0535796	0.0456968	0.0702703	0.0266947	0.0648387	0.198858	0.0702838	0.105701	0.0941641
0.73883	0.19484	0.0636947	0.0778646	0.0363574	0.044264	0.182531	0.0551518	0.0446435	0.152567	0.046	0.0653479	0.0844362	0.170856	0.0932719	0.0401709	0.0538426	0.0352833	0.0915636	0.122583	0.0141311	0.061284	0.0647876	0.0361852	0.219557	0.0759551	0.0537915	0.158355	0.0349451	0.113581	0.0572194	0.0229809	0.0594601	0.0478333	0.0696735	0.0566692	0.111207	0.0260682	0.0576337	0.081139	0.163077	0.0609865	0.0723125	0.0407642	0.0198899	0.0571971	0.0831004	0.0850134	0.121178	0.0389432
0.77494	0.155945	0.0769459	0.0632812	0.0414746	0.0368647	0.21634	0.0477016	0.0415647	0.138348	0.053202	0.0792633	0.062931	0.249749	0.111381	0.0459083	0.0478819	0.0420283	0.129355	0.113073	0.0181268	0.0440317	0.0738653	0.0326883	0.225457	0.0662308	0.048864	0.109216	0.042595	0.114371	0.0600456	0.0239425	0.0592935	0.0531798	0.0891312	0.0518365	0.0402989	0.0232592	0.0447091	0.0606629	0.139487	0.0497316	0.0645963	0.0742684	0.0203837	0.0659211	0.122699	0.0557229	0.0730015	0.1379
0.81105	0.161813	0.0734579	0.094184	0.0884766	0.0245743	0.188228	0.0528968	0.0417098	0.122172	0.0664242	0.0602046	0.0477138	0.215383	0.0937281	0.048971	0.0392221	0.0434079	0.136364	0.120198	0.0208294	0.0176056	0.0547772	0.0228265	0.19931	0.0961218	0.0440853	0.0838581	0.0422674	0.0878323	0.0346484	0.0226927	0.0459793	0.0644401	0.0648755	0.0440204	0.0846863	0.0237991	0.0337107	0.0531404	0.155712	0.0462234	0.0542247	0.0738956	0.0322275	0.0532688	0.226183	0.127038	0.0521935	0.110746
0.84717	0.28763	0.105423	0.0478125	0.0446484	0.016066	0.249715	0.0366869	0.0515584	0.138762	0.0474242	0.0685948	0.067719	0.15741	0.127308	0.0421795	0.046373	0.0537139	0.124536	0.121708	0.0263699	0.0495998	0.0394819	0.0361023	0.186185	0.0908205	0.046399	0.136611	0.0413896	0.101547	0.0285833	0.0239425	0.0319874	0.0459379	0.0781572	0.0756048	0.0379225	0.0316332	0.064945	0.0468273	0.118689	0.0461891	0.0758353	0.112209	0.0274144	0.0499068	0.247516	0.18928	0.0902306	0.0384874
0.88328	0.160087	0.0712353	0.0325174	0.0878906	0.0177888	0.205732	0.0667736	0.0489148	0.164904	0.0674949	0.0786903	0.0748741	0.165492	0.143323	0.0387616	0.057329	0.0678343	0.0872909	0.119792	0.0296001	0.0548322	0.0323938	0.0287975	0.154149	0.0995833	0.0383496	0.116818	0.0556699	0.0820765	0.0367025	0.0159617	0.062757	0.0607368	0.0907305	0.066902	0.0624188	0.0263112	0.0378223	0.0346039	0.124858	0.0395279	0.0751782	0.0535788	0.00758248	0.0485663	0.0987786	0.163651	0.0595418	0.110442
0.91939	0.187347	0.0357647	0.0699132	0.0498242	0.0381386	0.23337	0.0455421	0.0480757	0.126421	0.0356667	0.050955	0.0665293	0.142517	0.0918187	0.0318359	0.0291846	0.014017	0.0841182	0.104167	0.0233961	0.0352113	0.0177927	0.0304147	0.112271	0.107212	0.033762	0.179503	0.0559425	0.0996332	0.0404193	0.020577	0.0473693	0.0616723	0.0969341	0.0530771	0.0807546	0.0396834	0.0490959	0.0569171	0.130057	0.0593596	0.0558691	0.076794	0.022188	0.045362	0.201304	0.199758	0.0684597	0.0855694
0.9555	0.141277	0.086744	0.0783507	0.0323535	0.0265941	0.240237	0.0552645	0.0382839	0.115158	0.0289091	0.0553342	0.0553552	0.135207	0.0759849	0.0329961	0.0331584	0.0083966	0.139427	0.0966354	0.0220443	0.0436432	0.0526839	0.0219489	0.0997811	0.0830705	0.035408	0.100486	0.0447254	0.0699447	0.0441836	0.0202889	0.03695	0.0840378	0.0755174	0.0513814	0.0690572	0.0593498	0.0356054	0.0466966	0.146909	0.0382735	0.0629595	0.0585275	0.012104	0.0561434	0.166796	0.236893	0.135768	0.0591755
0.99161	0.129367	0.0655898	0.055816	0.0658301	0.0303168	0.242505	0.0735039	0.0408707	0.116042	0.0438485	0.0499864	0.0398621	0.150683	0.0939094	0.0575956	0.0378257	0.0202748	0.154327	0.116812	0.0151807	0.0410798	0.060228	0.0188252	0.0974658	0.0522179	0.0434323	0.0555	0.060578	0.0709253	0.0377832	0.0278851	0.0315968	0.060635	0.0918207	0.074913	0.0591218	0.0417901	0.0239151	0.0655379	0.0810969	0.0484097	0.0448336	0.0841845	0.0111957	0.0523799	0.397533	0.186023	0.082435	0.118808
1.02772	0.260898	0.0775962	0.0633507	0.0778906	0.025604	0.224194	0.0614657	0.0356782	0.128205	0.0452828	0.0791678	0.0277345	0.160103	0.0524139	0.0547635	0.0603843	0.00799858	0.109636	0.132125	0.016256	0.0474789	0.061544	0.0295232	0.0819376	0.0549038	0.0265536	0.147963	0.0471812	0.0720553	0.042431	0.0201923	0.0304136	0.050921	0.0957443	0.0532862	0.0996089	0.0394942	0.0658884	0.064941	0.117493	0.0385954	0.0526596	0.110317	0.0224734	0.055957	0.300792	0.100479	0.0367415	0.171292
1.06383	0.221875	0.125822	0.072691	0.0254102	0.0262376	0.225638	0.0850651	0.0483785	0.190843	0.042596	0.0721555	0.0335172	0.220155	0.0782598	0.033527	0.0398313	0.00525496	0.1115	0.11101	0.0267779	0.0492993	0.0514819	0.0461299	0.0880952	0.055782	0.0336947	0.169929	0.0435251	0.0828811	0.0439388	0.0216832	0.0398047	0.0692147	0.0960764	0.053006	0.0896863	0.0269058	0.0498742	0.035639	0.0897151	0.0441216	0.0392027	0.118546	0.0239124	0.0542796	0.280789	0.237462	0.0398189	0.116222
1.09994	0.221364	0.0416518	0.0536458	0.078125	0.0210891	0.231835	0.0374241	0.047817	0.102025	0.0313333	0.0586903	0.0406103	0.139221	0.133767	0.0343678	0.0369822	0.0205751	0.147318	0.104479	0.0190319	0.0510141	0.0397928	0.0342156	0.0655227	0.0484167	0.0314843	0.0730642	0.0477603	0.0922111	0.0265013	0.0215387	0.0354911	0.0681047	0.110216	0.0425393	0.103186	0.0839318	0.0441195	0.0650365	0.16916	0.050359	0.0335042	0.0902796	0.0181772	0.0486953	0.20781	0.098631	0.0742663	0.0997929
1.13605	0.271117	0.0566709	0.0602951	0.0199414	0.0201386	0.231047	0.0770165	0.0454322	0.081309	0.021	0.0613779	0.0324724	0.142907	0.0808066	0.0308176	0.0396907	0.0181317	0.132309	0.114396	0.0178766	0.0635645	0.0393264	0.0247685	0.0705309	0.0517308	0.0275895	0.142419	0.0497931	0.0751392	0.0497207	0.0101923	0.0440953	0.0627	0.125451	0.0426021	0.0300923	0.0479229	0.0133648	0.0664171	0.0995726	0.0560884	0.0535152	0.0668406	0.0202449	0.0444373	0.204087	0.116356	0.109706	0.0899811
1.17216	0.167845	0.0988823	0.06125	0.0291797	0.0151221	0.225962	0.0730356	0.0552997	0.111876	0.032697	0.0961255	0.0473086	0.153663	0.0677039	0.0383813	0.0348922	0.0173286	0.124973	0.0909583	0.0192965	0.061196	0.0226321	0.0230684	0.0713355	0.0570064	0.0372001	0.144943	0.0493445	0.0848848	0.0229993	0.00798085	0.0477427	0.0658362	0.0904317	0.0454381	0.0138081	0.0190986	0.0168318	0.0685323	0.075812	0.0376123	0.0340034	0.0741472	0.0152623	0.0350179	0.301879	0.144043	0.128381	0.124741
1.20827	0.253977	0.0471304	0.0805556	0.0768262	0.0152871	0.296336	0.0219081	0.051918	0.126056	0.0328788	0.0693997	0.0603379	0.181023	0.112384	0.0427683	0.0419306	0.00523654	0.133518	0.0586458	0.0271992	0.0614425	0.0276788	0.0214167	0.0315326	0.0427179	0.0409153	0.169051	0.0600785	0.0733816	0.0540091	0.0296153	0.0476393	0.0589191	0.0949972	0.0575415	0.0534133	0.0292556	0.023011	0.0724242	0.157479	0.0536303	0.0558387	0.077931	0.0250768	0.0263656	0.513882	0.146147	0.0331641	0.0648043
1.24438	0.269504	0.0958649	0.0509375	0.0574219	0.0193861	0.22525	0.0547441	0.044795	0.104703	0.0383737	0.0892769	0.0302086	0.14164	0.112202	0.029306	0.0192128	0.034687	0.104273	0.0640729	0.0153923	0.0740106	0.0617824	0.0109882	0.0553913	0.0201474	0.0383316	0.174078	0.0509841	0.102846	0.0495736	0.0229809	0.0545204	0.0487009	0.0918871	0.0457391	0.0604096	0.0534063	0.0285299	0.0656419	0.145541	0.0564778	0.0700836	0.0673625	0.0227377	0.029491	0.504723	0.118372	0.0199458	0.0222096
1.28049	0.306297	0.0916359	0.0811806	0.0683594	0.0184026	0.227114	0.0844666	0.0610347	0.138081	0.039404	0.109141	0.0445448	0.136674	0.087722	0.0423475	0.0541799	0.0303456	0.124536	0.0701875	0.0154619	0.0641115	0.0786114	0.0239599	0.06104	0.0274808	0.0272219	0.170449	0.0490524	0.0975346	0.052125	0.0062498	0.0355256	0.0528502	0.102075	0.0296791	0.0553505	0.0447892	0.0209434	0.0631798	0.127536	0.0618683	0.0750549	0.0892078	0.0227761	0.0313763	0.367415	0.109705	0.0576471	0.108616
1.3166	0.245531	0.0586725	0.0733854	0.0421191	0.0240132	0.220896	0.078248	0.0460315	0.0902453	0.0503636	0.123943	0.0758586	0.106294	0.0729819	0.052667	0.0371322	0.0150113	0.142173	0.0927812	0.0161025	0.0530646	0.0765181	0.02698	0.0468747	0.0320513	0.0317915	0.0433784	0.0388101	0.0874747	0.0276641	0.0442314	0.0632912	0.0447843	0.11508	0.0365839	0.0855959	0.0444915	0.0349607	0.0593511	0.140413	0.0623765	0.0669063	0.057931	0.0280297	0.0255771	0.353301	0.13477	0.0233189	0.0981199
1.35271	0.296638	0.0989205	0.040625	0.0475293	0.0215445	0.213645	0.0603469	0.0567571	0.098163	0.0536162	0.102674	0.0776414	0.0752938	0.0630604	0.0511544	0.0378257	0.00510623	0.114345	0.102156	0.0149738	0.0643592	0.0506632	0.012944	0.0466557	0.0429872	0.0382996	0.137848	0.0521992	0.0787465	0.0370221	0.0182211	0.0592418	0.0446583	0.0900221	0.0359593	0.082286	0.0351453	0.047217	0.0605604	0.184829	0.0604102	0.064538	0.0830382	0.0106547	0.0485448	0.398426	0.148052	0.0507198	0.0464735
1.38882	0.340641	0.108717	0.00215278	0.0684766	0.0144884	0.214321	0.0831743	0.0661767	0.157214	0.0544849	0.0910505	0.0822431	0.127016	0.0725257	0.0432732	0.0501312	0.00198584	0.144691	0.109031	0.0132827	0.0635293	0.0634715	0.0156393	0.052879	0.0152949	0.0425606	0.189324	0.0604168	0.0866756	0.0451439	0.0203847	0.0422458	0.05111	0.0807969	0.0371728	0.0691587	0.0201525	0.0546855	0.0605829	0.186724	0.0627158	0.0591723	0.072535	0.0205692	0.0300502	0.509201	0.11721	0.0724938	0.155167
1.42493	0.217394	0.0850461	0.0353993	0.0433008	0.0229307	0.174803	0.0811882	0.0628643	0.0988276	0.0580909	0.103397	0.105588	0.126444	0.100643	0.0506737	0.0428023	0.0305411	0.162318	0.144646	0.0220014	0.063723	0.0621244	0.0141811	0.0325889	0.0249679	0.0421014	0.20947	0.0521602	0.0830618	0.0355762	0.0447598	0.0490121	0.0474406	0.0901549	0.0415404	0.0908801	0.0418179	0.063577	0.044257	0.231481	0.0579358	0.0661934	0.055452	0.0236465	0.0329677	0.580208	0.0890134	0.0384412	0.0581869
1.46104	0.240848	0.103269	0.0375868	0.0563574	0.0228449	0.166357	0.0706592	0.0403596	0.0794721	0.0393636	0.0557708	0.0789293	0.102401	0.135495	0.0664904	0.0440581	0.0161898	0.103945	0.120292	0.0199318	0.0765387	0.036	0.0203939	0.0219923	0.0344359	0.0485465	0.270037	0.0475898	0.0950359	0.035513	0.0390391	0.0509362	0.0522976	0.0914444	0.041153	0.0421919	0.0340108	0.0633648	0.0238258	0.275114	0.0719533	0.0718201	0.0493569	0.0173586	0.0643369	0.389446	0.0913222	0.0891594	0.189394
1.49715	0.309767	0.103339	0.0108507	0.0244141	0.0169109	0.132827	0.0834779	0.0788643	0.131988	0.0479798	0.0136426	0.106681	0.116743	0.113293	0.0579151	0.0468604	0.0159348	0.0727273	0.0911458	0.0148951	0.0836268	0.0284974	0.0190048	0.0342091	0.0144231	0.0497114	0.337838	0.0298383	0.0829493	0.0398763	0.00399042	0.0631821	0.0502908	0.076093	0.0440286	0.0276753	0.0336323	0.0491352	0.0245787	0.245726	0.0745639	0.078125	0.0546225	0.029457	0.0537634	0.320069	0.0792988	0.0541796	0.0631313
[truncated: 86 more columns]
