# Supplementary material for: Visualization of endogenous G proteins on endosomes and other organelles
Source: eLife. 2024 Nov 8;13:RP97033. doi: 10.7554/eLife.97033 (PMC11548881; doi:10.7554/eLife.97033)
Supplement: Figure 5—figure supplement 1—source data 1. [file elife-97033-fig5-figsupp1-data1.xlsx]

## Sheet: panel A
	control					Iso
PM	0.344	0.323	0.306	0.323	0.263	0.3085	0.296	0.2805	0.309	0.2395
ER	0.008	0.011	0.009	0.0125	0.008	0.016	0.019	0.0135	0.019	0.012
EE	0.0365	0.036	0.037	0.039	0.024	0.0455	0.0435	0.043	0.0475	0.029
RE	0.0635	0.0725	0.0605	0.073	0.05	0.074	0.085	0.068	0.083	0.056
LE	0.0685	0.0665	0.0625	0.074	0.0455	0.0815	0.079	0.073	0.0875	0.0555
	control					DA
PM	0.2615	0.3	0.2665	0.316	0.26	0.237	0.279	0.245	0.2985	0.2365
ER	0.002	0.0075	0.0085	0.014	0.007	0.009	0.0165	0.0145	0.022	0.012
EE	0.02	0.032	0.0315	0.042	0.0255	0.024	0.0385	0.0355	0.051	0.033
RE	0.0355	0.0605	0.055	0.067	0.0415	0.0425	0.0665	0.061	0.076	0.0485
LE	0.0385	0.07	0.0625	0.0725	0.0445	0.0465	0.082	0.072	0.087	0.0525
	control					Ach
PM	0.269	0.34	0.3045	0.3565	0.2945	0.239	0.3155	0.2895	0.3295	0.265
ER	0.005	0.011	0.01	0.0165	0.005	0.01	0.0165	0.014	0.0235	0.0125
EE	0.023	0.0345	0.0335	0.0445	0.025	0.026	0.0375	0.0355	0.0505	0.0275
RE	0.043	0.0615	0.06	0.076	0.0455	0.047	0.066	0.062	0.083	0.051
LE	0.0405	0.059	0.058	0.067	0.04	0.047	0.065	0.0625	0.0755	0.045

## Sheet: panel B
Time (seconds)	D2R
0	0.00066667	0.00022222	-0.0006667	0	0.00066667	0.00077778	-0.0001111	-0.0008889	0	0	0	-0.0001111	0.00055556	-0.0007778	-0.0008889	-0.0001111	0.00011111	0.00055556	0.00022222	0.00022222	-0.0007778	0.00011111	0	-0.0005556
6.4	0.00066667	0.00022222	0.00033333	0	-0.0003333	0.00077778	-0.0001111	0.00011111	0	0	0	0.00088889	0.00055556	0.00022222	0.00011111	-0.0001111	0.00011111	0.00055556	0.00022222	0.00022222	0.00022222	0.00011111	0	-0.0005556
12.8	0.00066667	0.00022222	0.00033333	0	-0.0003333	-0.0002222	-0.0001111	0.00011111	0	0	0	-0.0001111	-0.0004444	0.00022222	0.00011111	-0.0001111	0.00011111	-0.0004444	0.00022222	0.00022222	0.00022222	0.00011111	0	0.00044444
19.2	-0.0003333	0.00022222	-0.0006667	0	-0.0003333	-0.0002222	-0.0001111	0.00011111	0	0	0	-0.0001111	-0.0004444	0.00022222	-0.0008889	-0.0001111	0.00011111	-0.0004444	-0.0007778	-0.0007778	0.00022222	0.00011111	0	0.00044444
25.6	-0.0003333	0.00022222	0.00033333	0	-0.0003333	-0.0002222	-0.0001111	0.00011111	0	0	0	-0.0001111	0.00055556	-0.0007778	0.00011111	-0.0001111	0.00011111	-0.0004444	0.00022222	0.00022222	0.00022222	0.00011111	0	-0.0005556
32	-0.0003333	-0.0007778	0.00033333	0	0.00066667	-0.0002222	-0.0001111	0.00011111	0	0	0	-0.0001111	-0.0004444	0.00022222	0.00111111	-0.0001111	0.00011111	-0.0004444	0.00022222	-0.0007778	0.00022222	0.00011111	0	0.00044444
38.4	-0.0003333	-0.0007778	0.00033333	0	0.00066667	-0.0002222	0.00088889	0.00011111	0	0	0	-0.0001111	-0.0004444	0.00022222	0.00011111	-0.0001111	0.00011111	-0.0004444	0.00022222	0.00022222	0.00022222	-0.0008889	0	0.00044444
44.8	-0.0003333	0.00022222	-0.0006667	0	-0.0003333	-0.0002222	-0.0001111	0.00011111	0	0	0	-0.0001111	-0.0004444	0.00022222	0.00011111	-0.0001111	-0.0008889	0.00055556	-0.0007778	0.00022222	-0.0007778	0.00011111	0	-0.0005556
51.2	-0.0003333	0.00022222	0.00033333	0	-0.0003333	-0.0002222	-0.0001111	0.00011111	0	0	0	-0.0001111	0.00055556	0.00022222	0.00011111	0.00088889	0.00011111	0.00055556	0.00022222	0.00022222	0.00022222	0.00011111	0	0.00044444
57.6	-0.0003333	0.00022222	0.00033333	0	-0.0003333	-0.0002222	-0.0001111	0.00011111	0	0	0	-0.0001111	0.00055556	0.00022222	0.00011111	-0.0001111	0.00011111	0.00055556	0.00022222	0.00022222	0.00022222	0.00011111	0	-0.0005556
64	-0.0013333	-0.0007778	-0.0006667	0	-0.0013333	-0.0012222	-0.0001111	0.00011111	-0.001	-0.001	0	-0.0001111	-0.0004444	-0.0017778	-0.0008889	-0.0001111	-0.0008889	-0.0004444	0.00022222	0.00022222	-0.0007778	-0.0008889	0	-0.0005556
70.4	0.00066667	0.00022222	0.00133333	0.001	0.00066667	0.00077778	0.00088889	0.00111111	0.001	0	0.001	0.00088889	0.00055556	0.00022222	0.00011111	0.00088889	0.00011111	0.00055556	0.00122222	0.00122222	0.00022222	0.00111111	0.001	0.00144444
76.8	0.00066667	0.00122222	0.00133333	0.002	0.00066667	0.00177778	0.00188889	0.00211111	0.001	0.001	0.002	0.00188889	0.00155556	0.00222222	0.00111111	0.00088889	0.00111111	0.00155556	0.00222222	0.00222222	0.00122222	0.00211111	0.002	0.00144444
83.2	0.00166667	0.00122222	0.00133333	0.003	0.00266667	0.00177778	0.00288889	0.00211111	0.002	0.001	0.002	0.00288889	0.00155556	0.00222222	0.00211111	0.00288889	0.00211111	0.00255556	0.00322222	0.00322222	0.00222222	0.00111111	0.002	0.00344444
89.6	0.00166667	0.00222222	0.00233333	0.002	0.00266667	0.00177778	0.00288889	0.00311111	0.003	0.002	0.003	0.00288889	0.00255556	0.00222222	0.00211111	0.00288889	0.00211111	0.00355556	0.00322222	0.00322222	0.00222222	0.00211111	0.002	0.00344444
96	0.00166667	0.00222222	0.00233333	0.002	0.00266667	0.00277778	0.00288889	0.00311111	0.003	0.002	0.003	0.00288889	0.00255556	0.00222222	0.00311111	0.00288889	0.00311111	0.00355556	0.00322222	0.00322222	0.00222222	0.00311111	0.003	0.00244444
102.4	0.00266667	0.00322222	0.00233333	0.003	0.00266667	0.00277778	0.00388889	0.00311111	0.003	0.003	0.003	0.00288889	0.00355556	0.00322222	0.00311111	0.00288889	0.00311111	0.00355556	0.00322222	0.00322222	0.00322222	0.00311111	0.003	0.00344444
108.8	0.00266667	0.00322222	0.00333333	0.004	0.00366667	0.00377778	0.00388889	0.00411111	0.003	0.003	0.003	0.00388889	0.00355556	0.00322222	0.00311111	0.00388889	0.00311111	0.00355556	0.00422222	0.00322222	0.00322222	0.00311111	0.003	0.00444444
115.2	0.00266667	0.00322222	0.00333333	0.003	0.00366667	0.00377778	0.00388889	0.00411111	0.004	0.003	0.004	0.00388889	0.00255556	0.00422222	0.00311111	0.00388889	0.00411111	0.00455556	0.00422222	0.00422222	0.00322222	0.00311111	0.004	0.00344444
121.6	0.00366667	0.00322222	0.00333333	0.004	0.00366667	0.00377778	0.00388889	0.00411111	0.004	0.003	0.004	0.00388889	0.00355556	0.00422222	0.00311111	0.00388889	0.00411111	0.00355556	0.00422222	0.00522222	0.00322222	0.00311111	0.004	0.00444444
128	0.00366667	0.00322222	0.00333333	0.004	0.00366667	0.00377778	0.00388889	0.00411111	0.004	0.003	0.004	0.00388889	0.00355556	0.00422222	0.00311111	0.00388889	0.00411111	0.00455556	0.00422222	0.00422222	0.00422222	0.00311111	0.004	0.00344444
134.4	0.00366667	0.00322222	0.00333333	0.004	0.00366667	0.00377778	0.00388889	0.00411111	0.004	0.003	0.004	0.00388889	0.00355556	0.00422222	0.00411111	0.00488889	0.00411111	0.00455556	0.00422222	0.00422222	0.00422222	0.00411111	0.004	0.00444444
140.8	0.00366667	0.00322222	0.00333333	0.004	0.00466667	0.00477778	0.00488889	0.00411111	0.004	0.003	0.004	0.00388889	0.00455556	0.00422222	0.00411111	0.00488889	0.00411111	0.00455556	0.00522222	0.00422222	0.00422222	0.00411111	0.004	0.00444444
147.2	0.00366667	0.00322222	0.00433333	0.004	0.00466667	0.00477778	0.00488889	0.00411111	0.004	0.004	0.004	0.00488889	0.00455556	0.00422222	0.00411111	0.00488889	0.00511111	0.00455556	0.00422222	0.00522222	0.00422222	0.00411111	0.004	0.00544444
153.6	0.00366667	0.00322222	0.00333333	0.004	0.00466667	0.00477778	0.00488889	0.00411111	0.005	0.004	0.004	0.00488889	0.00455556	0.00422222	0.00411111	0.00488889	0.00511111	0.00555556	0.00522222	0.00422222	0.00422222	0.00411111	0.004	0.00444444
160	0.00366667	0.00422222	0.00433333	0.004	0.00466667	0.00477778	0.00488889	0.00411111	0.005	0.004	0.005	0.00488889	0.00355556	0.00522222	0.00411111	0.00588889	0.00511111	0.00455556	0.00522222	0.00522222	0.00422222	0.00411111	0.004	0.00444444
166.4	0.00466667	0.00422222	0.00433333	0.004	0.00466667	0.00477778	0.00488889	0.00511111	0.005	0.004	0.005	0.00488889	0.00455556	0.00522222	0.00511111	0.00488889	0.00511111	0.00555556	0.00522222	0.00522222	0.00422222	0.00411111	0.004	0.00444444
172.8	0.00466667	0.00422222	0.00333333	0.004	0.00466667	0.00477778	0.00488889	0.00411111	0.005	0.004	0.005	0.00488889	0.00455556	0.00422222	0.00411111	0.00488889	0.00511111	0.00555556	0.00522222	0.00522222	0.00422222	0.00411111	0.004	0.00444444
179.2	0.00366667	0.00422222	0.00433333	0.004	0.00566667	0.00477778	0.00488889	0.00411111	0.005	0.004	0.005	0.00488889	0.00455556	0.00522222	0.00511111	0.00588889	0.00511111	0.00555556	0.00522222	0.00522222	0.00522222	0.00411111	0.004	0.00444444
185.6	0.00466667	0.00422222	0.00433333	0.004	0.00466667	0.00477778	0.00488889	0.00411111	0.005	0.004	0.005	0.00488889	0.00455556	0.00422222	0.00511111	0.00588889	0.00611111	0.00555556	0.00522222	0.00522222	0.00522222	0.00511111	0.004	0.00444444
192	0.00466667	0.00422222	0.00433333	0.005	0.00466667	0.00477778	0.00488889	0.00411111	0.005	0.004	0.005	0.00488889	0.00455556	0.00522222	0.00511111	0.00588889	0.00611111	0.00555556	0.00522222	0.00522222	0.00522222	0.00511111	0.005	0.00544444
198.4	0.00366667	0.00422222	0.00433333	0.005	0.00466667	0.00477778	0.00488889	0.00511111	0.005	0.004	0.005	0.00488889	0.00655556	0.00422222	0.00511111	0.00588889	0.00611111	0.00555556	0.00622222	0.00522222	0.00522222	0.00511111	0.005	0.00444444
204.8	0.00466667	0.00422222	0.00433333	0.005	0.00566667	0.00477778	0.00488889	0.00511111	0.005	0.004	0.005	0.00488889	0.00455556	0.00522222	0.00511111	0.00588889	0.00611111	0.00555556	0.00522222	0.00522222	0.00522222	0.00411111	0.005	0.00544444
211.2	0.00366667	0.00422222	0.00433333	0.004	0.00466667	0.00477778	0.00488889	0.00511111	0.005	0.004	0.005	0.00488889	0.00555556	0.00522222	0.00511111	0.00588889	0.00611111	0.00555556	0.00622222	0.00622222	0.00522222	0.00511111	0.006	0.00444444
217.6	0.00466667	0.00422222	0.00433333	0.004	0.00466667	0.00477778	0.00588889	0.00511111	0.005	0.004	0.005	0.00488889	0.00555556	0.00522222	0.00511111	0.00588889	0.00511111	0.00555556	0.00522222	0.00522222	0.00522222	0.00511111	0.005	0.00544444
224	0.00466667	0.00422222	0.00433333	0.005	0.00466667	0.00477778	0.00488889	0.00511111	0.005	0.004	0.005	0.00488889	0.00555556	0.00522222	0.00611111	0.00488889	0.00611111	0.00555556	0.00622222	0.00522222	0.00522222	0.00511111	0.005	0.00544444
230.4	0.00466667	0.00422222	0.00433333	0.005	0.00566667	0.00577778	0.00488889	0.00511111	0.005	0.005	0.004	0.00488889	0.00655556	0.00622222	0.00511111	0.00588889	0.00611111	0.00555556	0.00622222	0.00622222	0.00522222	0.00511111	0.005	0.00544444
236.8	0.00466667	0.00422222	0.00433333	0.004	0.00466667	0.00477778	0.00488889	0.00511111	0.005	0.004	0.005	0.00488889	0.00555556	0.00522222	0.00511111	0.00588889	0.00611111	0.00655556	0.00622222	0.00622222	0.00522222	0.00411111	0.005	0.00544444
243.2	0.00466667	0.00422222	0.00433333	0.005	0.00566667	0.00477778	0.00488889	0.00511111	0.005	0.004	0.005	0.00488889	0.00555556	0.00622222	0.00511111	0.00588889	0.00611111	0.00655556	0.00522222	0.00622222	0.00522222	0.00511111	0.005	0.00544444
249.6	0.00266667	0.00222222	0.00233333	0.002	0.00366667	0.00277778	0.00388889	0.00311111	0.003	0.002	0.003	0.00288889	0.00255556	0.00322222	0.00311111	0.00288889	0.00411111	0.00355556	0.00422222	0.00422222	0.00322222	0.00311111	0.003	0.00344444
256	0.00266667	0.00222222	0.00233333	0.003	0.00366667	0.00377778	0.00388889	0.00411111	0.004	0.003	0.003	0.00288889	0.00355556	0.00422222	0.00411111	0.00388889	0.00411111	0.00455556	0.00422222	0.00522222	0.00322222	0.00311111	0.003	0.00344444
262.4	0.00266667	0.00222222	0.00333333	0.003	0.00366667	0.00277778	0.00388889	0.00411111	0.004	0.002	0.003	0.00288889	0.00355556	0.00422222	0.00411111	0.00488889	0.00511111	0.00355556	0.00422222	0.00422222	0.00322222	0.00311111	0.003	0.00244444
268.8	0.00266667	0.00222222	0.00233333	0.003	0.00366667	0.00277778	0.00388889	0.00311111	0.003	0.002	0.003	0.00288889	0.00455556	0.00322222	0.00411111	0.00388889	0.00411111	0.00455556	0.00422222	0.00422222	0.00322222	0.00311111	0.003	0.00344444
275.2	0.00166667	0.00222222	0.00233333	0.002	0.00266667	0.00277778	0.00288889	0.00311111	0.003	0.002	0.003	0.00288889	0.00355556	0.00422222	0.00411111	0.00488889	0.00411111	0.00455556	0.00422222	0.00422222	0.00322222	0.00311111	0.002	0.00344444
281.6	0.00166667	0.00122222	0.00233333	0.002	0.00266667	0.00277778	0.00288889	0.00311111	0.003	0.002	0.003	0.00288889	0.00355556	0.00322222	0.00311111	0.00388889	0.00411111	0.00355556	0.00422222	0.00522222	0.00322222	0.00311111	0.003	0.00244444
288	0.00166667	0.00122222	0.00133333	0.002	0.00266667	0.00277778	0.00288889	0.00311111	0.002	0.001	0.003	0.00288889	0.00355556	0.00422222	0.00311111	0.00288889	0.00411111	0.00355556	0.00422222	0.00422222	0.00222222	0.00211111	0.003	0.00244444
294.4	0.00166667	0.00122222	0.00133333	0.002	0.00266667	0.00177778	0.00288889	0.00311111	0.002	0.001	0.002	0.00188889	0.00255556	0.00322222	0.00311111	0.00388889	0.00311111	0.00355556	0.00422222	0.00322222	0.00222222	0.00211111	0.003	0.00244444
300.8	0.00066667	0.00022222	0.00133333	0.002	0.00266667	0.00177778	0.00188889	0.00311111	0.002	0.001	0.002	0.00188889	0.00355556	0.00322222	0.00311111	0.00288889	0.00311111	0.00355556	0.00422222	0.00422222	0.00222222	0.00311111	0.001	0.00344444
307.2	0.00066667	0.00122222	0.00133333	0.002	0.00266667	0.00177778	0.00288889	0.00211111	0.002	0.001	0.002	0.00188889	0.00255556	0.00322222	0.00311111	0.00388889	0.00311111	0.00355556	0.00322222	0.00422222	0.00222222	0.00211111	0.003	0.00244444
313.6	0.00066667	0.00122222	0.00133333	0.001	0.00166667	0.00177778	0.00288889	0.00211111	0.001	0.001	0.002	0.00188889	0.00255556	0.00222222	0.00311111	0.00288889	0.00311111	0.00255556	0.00322222	0.00322222	0.00222222	0.00211111	0.002	0.00244444
320	0.00066667	0.00122222	0.00133333	0.001	0.00166667	0.00077778	0.00188889	0.00211111	0.002	0.001	0.002	0.00188889	0.00255556	0.00322222	0.00311111	0.00388889	0.00311111	0.00355556	0.00322222	0.00322222	0.00222222	0.00211111	0.002	0.00244444
326.4	0.00066667	0.00122222	0.00133333	0.001	0.00166667	0.00177778	0.00188889	0.00211111	0.002	0.001	0.001	0.00188889	0.00255556	0.00222222	0.00211111	0.00288889	0.00311111	0.00355556	0.00322222	0.00322222	0.00222222	0.00211111	0.003	0.00244444
332.8	0.00066667	0.00022222	0.00133333	0.001	0.00166667	0.00177778	0.00188889	0.00211111	0.001	0.001	0.001	0.00188889	0.00255556	0.00222222	0.00311111	0.00288889	0.00311111	0.00355556	0.00322222	0.00422222	0.00222222	0.00211111	0.001	0.00244444
339.2	0.00066667	0.00022222	0.00033333	0.001	0.00166667	0.00077778	0.00188889	0.00211111	0.001	0	0.002	0.00188889	0.00255556	0.00222222	0.00211111	0.00288889	0.00311111	0.00355556	0.00322222	0.00322222	0.00122222	0.00111111	0.001	0.00244444
345.6	-0.0003333	0.00022222	0.00033333	0.001	0.00166667	0.00177778	0.00188889	0.00211111	0.001	0.001	0.002	0.00188889	0.00155556	0.00222222	0.00311111	0.00288889	0.00211111	0.00255556	0.00322222	0.00322222	0.00222222	0.00111111	0.002	0.00144444
352	0.00066667	0.00022222	0.00033333	0.001	0.00066667	0.00177778	0.00188889	0.00211111	0.001	0.001	0.001	0.00188889	0.00255556	0.00222222	0.00211111	0.00288889	0.00311111	0.00255556	0.00322222	0.00322222	0.00122222	0.00111111	0.002	0.00144444
358.4	-0.0003333	0.00022222	0.00033333	0.001	0.00166667	0.00177778	0.00188889	0.00211111	0.001	0	0.002	0.00188889	0.00255556	0.00322222	0.00211111	0.00288889	0.00311111	0.00255556	0.00322222	0.00322222	0.00122222	0.00111111	0.001	0.00144444
364.8	-0.0003333	0.00022222	0.00033333	0.001	0.00066667	0.00077778	0.00188889	0.00111111	0.001	0	0.001	0.00188889	0.00255556	0.00222222	0.00211111	0.00288889	0.00211111	0.00255556	0.00322222	0.00322222	0.00122222	0.00111111	0.001	0.00144444
371.2	-0.0003333	0.00022222	0.00033333	0.001	0.00066667	0.00077778	0.00188889	0.00111111	0.001	0	0.001	0.00088889	0.00155556	0.00222222	0.00211111	0.00288889	0.00211111	0.00255556	0.00322222	0.00322222	0.00122222	0.00111111	0.001	0.00144444
377.6	-0.0003333	0.00022222	0.00033333	0.001	0.00066667	0.00077778	0.00188889	0.00111111	0.001	0	0.001	0.00188889	0.00155556	0.00222222	0.00211111	0.00288889	0.00211111	0.00255556	0.00222222	0.00322222	0.00122222	0.00011111	0.001	0.00144444
384	-0.0003333	0.00022222	0.00033333	0.001	0.00066667	0.00077778	0.00088889	0.00111111	0	0	0.001	0.00088889	0.00255556	0.00222222	0.00211111	0.00288889	0.00211111	0.00255556	0.00222222	0.00322222	0.00122222	0.00111111	0.001	0.00144444
390.4	-0.0003333	0.00022222	0.00033333	0.001	0.00066667	0.00077778	0.00088889	0.00111111	0	0	0.001	0.00088889	0.00155556	0.00122222	0.00211111	0.00288889	0.00211111	0.00255556	0.00322222	0.00222222	0.00022222	0.00111111	0.001	0.00144444
396.8	-0.0003333	-0.0007778	0.00033333	0.001	0.00066667	0.00077778	0.00088889	0.00111111	0	0	0.001	0.00088889	0.00255556	0.00222222	0.00211111	0.00188889	0.00211111	0.00255556	0.00222222	0.00322222	0.00122222	0.00111111	0.002	0.00144444
403.2	-0.0003333	-0.0007778	-0.0006667	0.001	0.00066667	0.00077778	0.00088889	0.00111111	0	0	0.001	0.00188889	0.00155556	0.00222222	0.00211111	0.00288889	0.00211111	0.00255556	0.00222222	0.00322222	0.00122222	0.00111111	0.001	0.00144444
409.6	-0.0003333	-0.0007778	-0.0006667	0	0.00066667	0.00077778	0.00088889	0.00111111	0	0	0.001	0.00088889	0.00155556	0.00222222	0.00111111	0.00188889	0.00211111	0.00255556	0.00222222	0.00222222	0.00122222	0.00111111	0.001	0.00044444
416	-0.0003333	-0.0007778	-0.0006667	0	0.00066667	0.00077778	0.00088889	0.00011111	0	0	0.001	0.00088889	0.00155556	0.00222222	0.00211111	0.00188889	0.00211111	0.00155556	0.00222222	0.00222222	0.00122222	0.00111111	0.001	0.00144444
422.4	-0.0013333	-0.0007778	0.00033333	0	0.00066667	0.00077778	0.00188889	0.00011111	0	0	0	0.00088889	0.00155556	0.00222222	0.00211111	0.00288889	0.00311111	0.00255556	0.00222222	0.00222222	0.00022222	0.00111111	0.001	0.00144444
428.8	-0.0013333	-0.0007778	-0.0006667	0	0.00066667	0.00077778	0.00088889	0.00111111	0	0	0	0.00188889	0.00155556	0.00222222	0.00211111	0.00188889	0.00211111	0.00255556	0.00222222	0.00322222	0.00022222	0.00111111	0.001	0.00144444
435.2	-0.0013333	-0.0007778	0.00033333	0	-0.0003333	0.00077778	0.00088889	0.00111111	0	-0.001	0	0.00088889	0.00155556	0.00122222	0.00211111	0.00288889	0.00211111	0.00255556	0.00222222	0.00222222	0.00122222	0.00011111	0.001	0.00244444
441.6	-0.0003333	-0.0007778	-0.0006667	0	0.00066667	0.00077778	0.00088889	0.00011111	0	0	0.001	0.00088889	0.00055556	0.00222222	0.00111111	0.00188889	0.00211111	0.00155556	0.00222222	0.00322222	0.00022222	0.00111111	0	0.00244444
448	-0.0003333	-0.0007778	-0.0006667	0	-0.0003333	0.00077778	0.00088889	0.00111111	0	0	0.001	0.00088889	0.00155556	0.00122222	0.00211111	0.00188889	0.00211111	0.00255556	0.00222222	0.00322222	0.00122222	0.00011111	0.001	0.00144444
454.4	-0.0013333	-0.0007778	-0.0006667	0	0.00066667	0.00077778	0.00088889	0.00111111	0	-0.001	0	0.00088889	0.00155556	0.00222222	0.00211111	0.00188889	0.00211111	0.00255556	0.00222222	0.00222222	0.00022222	0.00111111	0	0.00144444
460.8	-0.0003333	-0.0007778	-0.0006667	0	-0.0003333	0.00077778	0.00088889	0.00111111	0	0	0	0.00088889	0.00155556	0.00122222	0.00111111	0.00188889	0.00211111	0.00255556	0.00222222	0.00222222	0.00022222	0.00011111	0.001	0.00144444
467.2	-0.0013333	-0.0007778	-0.0006667	0	0.00066667	-0.0002222	0.00088889	0.00111111	0	-0.001	0	0.00088889	0.00155556	0.00122222	0.00111111	0.00288889	0.00211111	0.00255556	0.00222222	0.00222222	0.00022222	0.00111111	0	0.00144444
473.6	-0.0013333	-0.0007778	-0.0006667	0	-0.0003333	-0.0002222	0.00088889	0.00111111	0	0	0.001	0.00088889	0.00155556	0.00122222	0.00111111	0.00188889	0.00211111	0.00255556	0.00222222	0.00222222	0.00022222	0.00111111	0.001	0.00144444
480	-0.0013333	-0.0007778	-0.0006667	0	0.00066667	-0.0002222	0.00088889	0.00111111	0	-0.001	0	0.00088889	0.00155556	0.00122222	0.00211111	0.00188889	0.00111111	0.00255556	0.00222222	0.00222222	0.00022222	0.00011111	0	0.00144444
486.4	-0.0013333	-0.0007778	0.00033333	0	-0.0003333	-0.0002222	0.00088889	0.00011111	0	0	0	0.00088889	0.00155556	0.00222222	0.00111111	0.00188889	0.00211111	0.00255556	0.00222222	0.00222222	0.00022222	0.00011111	0	0.00144444
492.8
499.2
505.6
