# Supplementary material for: Visualization of endogenous G proteins on endosomes and other organelles
Source: eLife. 2024 Nov 8;13:RP97033. doi: 10.7554/eLife.97033 (PMC11548881; doi:10.7554/eLife.97033)
Supplement: Figure 5—figure supplement 2—source data 1. [file elife-97033-fig5-figsupp2-data1.xlsx]

## Sheet: panel A
	control				Iso
EE	0.115	0.0895	0.117	0.1065	0.1175	0.083	0.117	0.1105
RE	0.0945	0.068	0.096	0.085	0.107	0.075	0.1065	0.099
LE	0.0815	0.063	0.0825	0.0735	0.0935	0.066	0.0865	0.0785
	control				DA
EE	0.102	0.116	0.121	0.0975	0.1125	0.1385	0.134	0.101
RE	0.076	0.0795	0.0925	0.068	0.084	0.0875	0.099	0.075
LE	0.077	0.0815	0.083	0.064	0.09	0.098	0.098	0.084
	control				Ach
EE	0.109	0.086	0.101	0.0995	0.1035	0.085	0.106	0.0955
RE	0.082	0.076	0.09	0.071	0.0915	0.083	0.0895	0.08
LE	0.0835	0.0755	0.0805	0.076	0.0835	0.0825	0.082	0.075

## Sheet: panel B
	control				Iso
EE	0.102	0.122	0.116	0.0995	0.1045	0.1295	0.1215	0.0985
RE	0.08	0.0895	0.092	0.0785	0.0905	0.107	0.106	0.086
LE	0.072	0.0835	0.08	0.066	0.073	0.096	0.0895	0.0645
	control				DA
EE	0.108	0.0805	0.108	0.102	0.114	0.081	0.111	0.1045
RE	0.0885	0.0695	0.0875	0.0715	0.0935	0.065	0.085	0.0785
LE	0.089	0.0715	0.0815	0.074	0.0985	0.0745	0.098	0.084
	control				Ach
EE	0.095	0.0885	0.1175	0.0825	0.091	0.095	0.1165	0.0815
RE	0.0735	0.0705	0.0985	0.076	0.081	0.0755	0.097	0.0715
LE	0.073	0.073	0.0835	0.0635	0.0815	0.081	0.087	0.072
